# Supplementary material for: Comparative RNA-sequencing profiled the differential gene expression of liver in response to acetyl-CoA carboxylase inhibitor GS-0976 in a mouse model of NASH
Source: PeerJ journal article supplement (doi:10.7717/peerj.8115), 2019-12-20
Supplement: Supplemental_data_S1.docx [file Supplemental_data_S1.docx]

**Supplementary Table 1** Primer sequences used in qRT-PCR analysis for in vitro studies

| Gene name | Species | Forward primer (5'-3') | Reverse primer (5'-3') |
| --- | --- | --- | --- |
| αSMA | Human | GATGGTGGGAATGGGACAAA | GCCATGTTCTATCGGGTACTTC |
| COL1A1 | Human | CTAAAGGCGAACCTGGTGAT | TCCAGGAGCACCAACATTAC |
| CTGF | Human | GCTGACCTGGAAGAGAACATTA | TGCAGCCAGAAAGCTCAA |
| COL1A2 | Human | AGAGTGGAGCAGTGGTTACTA | GATACAGGTTTCGCCAGTAGAG |
| COL3A1 | Human | CCTCATTAGTCCTGATGGTTCTC | GGTTAGGGTCAACCCAGTATTC |
| SULF2 | Human | CCCACATCGTCCTCAACATT | GGATGGATTTCCCGTCCATATC |
| β-ACTIN | Human | GGACCTGACTGACTACCTCAT | CGTAGCACAGCTTCTCCTTAAT |
| Adipor2 | Mouse | AGGACTCCAGAGCCAGATATAC | CTCTAAGCTGGGCTCCAAATC |
| Ces1f | Mouse | GAAGACGGAGGAGGAGCTATTA | GTCACGAACTGGTCGCTATTT |
| Lipc | Mouse | ATTGCCCACTATGACTTCTACC | GGTCTGGGTTATGGCGTTTA |
| Dbi | Mouse | GCTACTGTGGGCGATGTAAATA | GGAAGTCCCTTTCAGCTTGT |
| Fabp1 | Mouse | CCAGAAAGGGAAGGACATCAA | ACTCATTGCGGACCACTTT |
| Adam8 | Mouse | CGAGTGCTGGAGGTTGTAAA | GCATAGCGGCTGATGTAGAA |
| Ccr1 | Mouse | GCTATGCAGGGATCATCAGAAT | GGTCCAGAGGAGGAAGAATAGA |
| Itgb2 | Mouse | GCAGTAATGGAGCATCGAGTAT | TCGGAAGCCATGACCTTTAC |
| Itgam | Mouse | GCTTCAGAGATGACCAGTAAGG | ACAGGGATCCAGAAGACTACA |
| Sulf2 | Mouse | GGAGAAACATGGCTCAGACTAC | CCTGTGTGGGTACATCTTCTTG |
| Col3a1 | Mouse | TCCCCTGGAATCTGTGAATC | TGAGTCGAATTGGGGAGAAT |
| Col1a2 | Mouse | CAAGCATGTCTGGTTAGGAGAG | AGGACACCCCTTCTACGTTGT |
| Mmp12 | Mouse | TTGTGGATAAACACTACTGGAGGT | AAATCAGCTTGGGGTAAGCA |
| β-actin | Mouse | GAGGTATCCTGACCCTGAAGTA | CACACGCAGCTCATTGTAGA |
