# Supplementary material for: Comparative RNA-sequencing profiled the differential gene expression of liver in response to acetyl-CoA carboxylase inhibitor GS-0976 in a mouse model of NASH
Source: PeerJ journal article supplement (doi:10.7717/peerj.8115), 2019-12-20
Supplement: Supplemental_data_S2_raw_data.xlsx [file Supplemental_data_S2_raw_data.xlsx]

## Sheet: body weight
	body weight (g)
group day	control					model					GS-0976(3mg/kg/day)
	con-1（0165）	con-2（0119）	con-3（0168）	con-4（0120）	con-5（0296）	mo-1（0178）	mo-2（0108）	mo-3（0164）	mo-4（0111）	mo-5（0173）	gs-1（0404）	gs-2（0113）	gs-3（0282）	gs-4（0437）	gs-5（0499）
1	26.2	25.7	24.4	26.6	27.5	29.1	29	25.8	26.5	25.4	30.2	27.3	27.6	25.3	28.6
4	26.3	27.4	25.4	27.9	27.2	28.5	28.1	26.9	27.5	26.1	28.9	27.4	28.2	25.3	28.1
8	26.4	27.3	26.3	27.7	27.6	27.4	26.9	26	26.2	25.8	28.6	26.7	27.4	24.9	27.9
11	27.6	27.4	26	28	28.1	26.6	26	24.9	25.4	24.8	27.6	25.5	26.4	24.3	26.6
15	27.6	26.7	25.8	27.5	27.8	26.2	25.2	23.9	24.6	23.4	26.6	24.6	25.5	23	25.6
18	27.7	28.3	26.6	28	28.1	25.8	25.2	23.9	24.6	23.8	27.5	25.1	25.4	23.9	26.1
22	27.6	28.5	26.3	27.9	28.5	26.1	24.8	24.2	25	24.2	27.6	25.2	25.6	23.8	26.4
25	27.9	28.8	26.2	28.5	28.7	25.9	24.6	24	24.5	24.2	27.6	25.7	25.1	23.9	26.1
29	28.3	29.3	27	29.1	29.1	27.3	24.3	23.7	24.3	23.8	28.1	25.8	25.7	23.9	26
32	30.2	28.6	26	27.5	28.2	26.8	24.8	23.7	24.9	24.4	29.8	27.3	26.3	24.6	26.6
36	27.7	28.4	26.2	28.2	29.4	26	24.7	24.3	24.2	24.1	29.1	26.9	25.9	24.1	26.1
39	27.7	29.1	26.7	29	29.1	26.2	23.7	22.7	23.9	22.5	28.1	26.9	26.2	24.7	23.3
43	27.6	29.6	26.9	29.1	29.1	25.9	23.9	23.3	21.9	21.2	27.6	25	25.2	24.3	22.5
46	28.2	30	27	29.5	29.6	26.1	24.2	23.7	22.9	22.3	28.5	26	26	24.4	24.3
50	28.5	30	27.2	29.7	28.9	26.3	24.4	23.3	23.4	23	28.5	25.7	25.8	24	24.8
53	28.3	30	26.9	29.3	29.4	26.1	24.3	23.4	23.5	22.9	28.6	26.2	25.9	24.2	24.8
57	28.6	29.8	26.8	29.3	29.3	26.7	24.4	23.4	24.1	23.6	29.1	27	26.3	24.6	24.5
60	28.5	30.1	27	29.5	29.6	26	24.8	23.8	22.9	23.8	29.7	26.6	26.5	24.9	24.4
64	28.7	30.4	27.4	30.2	29.6	27.5	25.3	24.1	24.3	24	30.4	27.5	26.9	25.4	25.4
67	28.6	30.6	27.2	30.4	29.8	27.5	25.4	24.2	24.9	24.2	30.2	27	26.3	25.1	25.3
71	28.9	29.5	26.8	29.8	30	27.9	25.6	24.8	25	24.4	30.6	26.6	26.8	25.5	25.6
74	29	31.1	27.6	30.7	29.9	27.6	25.2	24.7	24.7	24.7	30.6	27	26.8	25.2	25.9
78	29.7	31.1	27.7	30.3	30.3	27.7	25.4	24.9	25	24.8	30.3	27.2	27.1	25.5	26.2
81	27.1	28.7	30.5	29	28.2	27.3	24.4	24.2	24	23.9	29	26.8	26.6	24.4	25.4
liver weight(g)	1.25	1.32	1.27	1.43	1.23	2.42	1.91	1.82	1.88	1.94	1.6	1.83	1.15	1.23	1.24
liver weight/liver	0.0461255	0.045993	0.0416393	0.0493103	0.043617	0.0886447	0.0782787	0.0752066	0.0783333	0.0811715	0.0551724	0.0682836	0.0432331	0.0504098	0.0488189

## Sheet: food intake
	food intake (g)（average weight per mouse per day）
group day	control	model	GS-0976 (3mg/kg/day)
4	2.9	2.3	2.3
8	3.4	2	2.1
11	4	2.1	1.8
15	3.4	2.4	2
18	3.5	2.5	2.5
22	3.3	2.3	2.5
25	3.2	2.3	2.4
29	3	2.3	2.5
32	3	2.4	2.7
36	3	2.5	2.4
39	3.7	2.6	2.7
43	3.5	2.4	2.6
46	3.6	2.3	2.5
50	3.5	2.2	2.3
53	3.7	2.3	2.6
57	3.7	2	2.5
67	4	2.4	2.2
71	3.9	2.2	2.3
74	4.1	2	2.4
78	3.8	1.9	2.2
81	4.2	2.3	2.1

## Sheet: serum biochemistry
		ALT (U/L)	AST(U/L)	HDL(mmol/L)	LDL(mmol/L)
control	con-1（0165）	28	92	1.96	0.3
	con-2（0119）	152	207	2.73	0.65
	con-3（0168）	24	82	2.12	0.36
	con-4（0120）	98	142	1.88	0.43
	con-5（0296）	39	166	1.75	0.31
model	mo-1（0178）	662	544	0.2	0.18
	mo-2（0108）	348	411	0.32	0.13
	mo-3（0164）	441	480	0.32	0.16
	mo-4（0111）	391	464	0.52	0.12
	mo-5（0173）	593	395	0.64	0.18
GS-0976(3mg/kg/day)	gs-1（0404）	281	348	1.27	0.15
	gs-2（0113）	175	240	0.77	0.1
	gs-3（0282）	245	279	0.83	0.08
	gs-4（0437）	237	214	0.92	0.1
	gs-5（0499）	253	311	1.28	0.13

## Sheet: liver histology 
		steatosis score	lobular inflammation score	ballooning score	NAS score	fibrosis area %
control	con-1（0165）	0	0	0	0	0.7
	con-2（0119）	0	0	0	0	0.59
	con-3（0168）	0	0	0	0	0.64
	con-4（0120）	0	0	0	0	0.75
	con-5（0296）	0	0	0	0	0.71
model	mo-1（0178）	3	3	0	6	6.09
	mo-2（0108）	3	3	0	6	5.3
	mo-3（0164）	3	3	0	6	7.01
	con-4（0120）	3	3	0	6	5.08
	con-5（0296）	3	3	0	6	6.11
GS-0976 (3mg/kg/day)	gs-1（0404）	2	3	0	5	3.85
	gs-2（0113）	1	2	1	4	5.49
	gs-3（0282）	2	2	0	4	3.7
	gs-4（0437）	2	3	0	5	4.99
	gs-5（0499）	2	2	0	4	5.02

## Sheet: tissue qPCR
				Adipor2	Cse1f	Lipc	Dbi	Fabp1	Adam8	Ccr1	Itgb2	Itgam	Sulf2	Col3a1	Mmp12	Col1a2
control	1		2^-(ΔCT)	0.16912	0.400197	0.124357	4.56046	12.2403	0.000376354	0.0019657	0.00443967	0.00243286	0.00345833	0.0115038	0.00018046	0.0189332
	2			0.167763	0.417227	0.122561	4.41187	12.5883	0.000419479	0.00189868	0.00447052	0.00251285	0.00334544	0.0113548	0.000223158	0.0158588
	3			0.171987	0.409783	0.138238	4.53073	12.8858	0.000338228	0.00188488	0.0047215	0.0026467	0.00350179	0.0113336	0.000203963	0.0171752
model	1		2^-(ΔCT)	0.0468	0.0332	0.0426	1.1951	4.6022	0.0098	0.0055	0.0309	0.0091	0.0081	0.0232	0.1059	0.06
	2			0.0472	0.0308	0.0383	0.8774	3.341	0.011	0.0057	0.0258	0.0097	0.0078	0.0271	0.106	0.0735
	3			0.0547	0.0274	0.037	0.7513	2.24	0.0131	0.0062	0.0281	0.011	0.0083	0.0287	0.1192	0.0674
			average	0.0495667	0.0304667	0.0393	0.941267	3.3944	0.0113	0.0058	0.0282667	0.00993333	0.00806667	0.0263333	0.110367	0.0669667
GS-0976 (3mg/kg/day)	1		2^-(ΔCT)	0.0633361	0.0656743	0.0808735	2.86853	7.00782	0.00622981	0.00479456	0.0234457	0.00597201	0.00443841	0.0231463	0.0908782	0.0538645
	2			0.076847	0.0712787	0.0814262	2.98424	9.41076	0.00636613	0.00402175	0.0224557	0.00627677	0.00485541	0.0211562	0.0895924	0.052296
	3			0.0740376	0.0833763	0.0934558	3.08347	9.72355	0.00599718	0.00366245	0.020537	0.00699855	0.00480447	0.0213687	0.0811631	0.0594446
		control	2^-(ΔΔCT)	3.41197	13.1356	3.16431	4.84502	3.60603	0.0333057	0.338914	0.157064	0.244919	0.428719	0.436854	0.0016351	0.282726
				3.38459	13.6945	3.1186	4.68716	3.70855	0.0371221	0.327359	0.158155	0.252971	0.414723	0.431194	0.00202197	0.236816
				3.46982	13.4502	3.5175	4.81344	3.7962	0.0299317	0.32498	0.167034	0.266446	0.434106	0.430391	0.00184805	0.256474
		model	2^-(ΔΔCT)	0.944183	1.08972	1.08397	1.26967	1.35582	0.867257	0.948276	1.09316	0.916107	1.00413	0.881013	0.959529	0.895968
				0.952253	1.01094	0.974555	0.932148	0.984268	0.973451	0.982759	0.912736	0.97651	0.966942	1.02911	0.960435	1.09756
				1.10356	0.899344	0.941476	0.79818	0.65991	1.15929	1.06897	0.994104	1.10738	1.02893	1.08987	1.08004	1.00647
		GS-0976 (3mg/kg/day)	2^-(ΔΔCT)	1.2778	2.15561	2.05785	3.04753	2.06452	0.551311	0.826647	0.829446	0.601209	0.550216	0.878973	0.823421	0.804348
				1.55038	2.33956	2.07191	3.17045	2.77244	0.563375	0.693405	0.794423	0.63189	0.601911	0.8034	0.811771	0.780925
				1.4937	2.73664	2.37801	3.27588	2.86458	0.530724	0.631457	0.726546	0.704552	0.595596	0.81147	0.735395	0.887675

## Sheet:  LX-2 qPCR-1
control
		aSMA	COL1A1	CTGF			aSMA	COL1A1	CTGF			aSMA	COL1A1	CTGF
1	ΔCT	8.28	6.17	5.91		2^(-ΔCT)	0.00321715	0.0138882	0.0166308		2^(-ΔΔCT)	0.213159	0.157453	0.341175
2		9.42	5.48	6.04			0.00145981	0.0224056	0.0151977			0.580265	0.254017	0.311776
3		9.6	5.44	6.05			0.00128858	0.0230355	0.0150928			0.512202	0.261158	0.309623
Model
1		6.05	3.87	4.67			0.0150928	0.0683934	0.0392817			1	0.775392	0.80585
2		8.66	3.39	4.21			0.00247218	0.0953912	0.0540336			0.982673	1.08147	1.10848
3		8.61	3.31	4.24			0.00255936	0.10083	0.0529216			1.01733	1.14314	1.08567
							0.00251577	0.0882049	0.0487456
GS0976-8.25uM
1		6.23	4.55	6.03			0.0133224	0.0426888	0.0153034			0.882703	0.483972	0.313945
2		9	4.34	5.32			0.00195312	0.0493776	0.0250334			0.776352	0.559805	0.513553
3		9.13	4.36	4.98			0.00178483	0.0486978	0.0316862			0.709455	0.552098	0.650033
GS0976-17.5uM
1		6.91	4.91	6.33			0.00831539	0.0332616	0.0124303			0.550953	0.377094	0.255003
2		9.14	4.32	5.07			0.0017725	0.0500669	0.0297699			0.704555	0.56762	0.61072
3		9.01	4.44	5.05			0.00193963	0.0460709	0.0301855			0.77099	0.522317	0.619246
GS0976-35uM
1		6.82	4.63	6.18			0.00885066	0.040386	0.0137922			0.586417	0.457866	0.282943
2		9.51	4.39	4.99			0.00137153	0.0476956	0.0314674			0.545172	0.540736	0.645542
3		9.38	4.47	5.13			0.00150085	0.0451228	0.0285572			0.596578	0.511568	0.585842

## Sheet:  LX-2 qPCR-2
control
		COL1A2	COL3A1	SUIF2			COL1A2	COL3A1	SUIF2			COL1A2	COL3A1	SUIF2
1	ΔCT	12.9548	9.08105	18.0889		2^(-ΔCT)	0.000125958	0.00184643	3.5867e-06		2^(-ΔΔCT)	0.221285	0.689283	0.38005
2		12.5483	8.60442	17.8666			0.000166945	0.00256928	4.18429e-06			0.29329	0.959128	0.443371
3		12.6893	8.65132	18.1852			0.000151406	0.00248711	3.35506e-06			0.265992	0.928452	0.355506
Model
1		11.0457	8.88296	16.5362			0.000473045	0.00211818	1.05222e-05			0.831051	0.790727	1.11494
2		10.4676	8.24741	16.551			0.000706241	0.00329066	1.04146e-05			1.24073	1.22842	1.10354
3		10.8862	8.5721	17.0488			0.000528352	0.00262748	7.37547e-06			0.928215	0.980853	0.781511
						average	0.000569213	0.00267877	9.43744e-06
GS0976-8.25uM
1		12.0665	9.21674	17.3694			0.000233147	0.00168067	5.90591e-06			0.409596	0.627405	0.625795
2		11.7811	9.08667	16.7038			0.000284138	0.00183925	9.36809e-06			0.499177	0.686602	0.992652
3		11.8491	8.55322	17.4525			0.00027106	0.00266209	5.5753e-06			0.476201	0.993775	0.590764
GS0976-17.5uM
1		12.3758	9.59701	17.3576			0.000188153	0.00129125	5.95444e-06			0.330549	0.482031	0.630938
2		11.9682	8.9764	17.7946			0.000249583	0.00198534	4.39836e-06			0.438471	0.741138	0.466055
3		12.0613	9.30866	18.3889			0.000233988	0.00157694	2.9133e-06			0.411073	0.58868	0.308696
GS0976-35uM
1		11.9855	9.84886	17.4301			0.000246609	0.00108442	5.66275e-06			0.433247	0.404821	0.60003
2		12.3056	9.7243	17.3986			0.000197542	0.00118221	5.78771e-06			0.347044	0.441326	0.613271
3		12.2158	9.68603	17.6906			0.00021022	0.00121399	4.72708e-06			0.369317	0.453188	0.500885
