# Supplementary material for: Comparative RNA-sequencing profiled the differential gene expression of liver in response to acetyl-CoA carboxylase inhibitor GS-0976 in a mouse model of NASH
Source: PeerJ journal article supplement (doi:10.7717/peerj.8115), 2019-12-20
Supplement: Supplemental_data_S3_raw_data-bioinformatics.xlsx [file Supplemental_data_S3_raw_data-bioinformatics.xlsx]

## Sheet: GSvsM0_DEG_ALL
ID	Model_1	Model_2	Model_3	GS0976_1	GS0976_2	GS0976_3	log2FoldChange	pvalue	padj	GeneName	Chrom	Strand	Start	End	GeneLength	GeneType	GeneDescription
ENSMUSG00000097330	829.566	397.739	265.218	1.03923	0	2.14309	-3.28888	6.21e-51	9.21e-47	Gm26672	chr18	-	37746559	37768242	6918	processed_transcript	predicted_gene_26672
ENSMUSG00000003053	262.755	281.024	144.048	1525.58	1007.71	1258	1.93254	2e-26	1.48e-22	Cyp2c29	chr19	+	39269405	39330713	3061	protein_coding	cytochrome_P450_family_2_subfamily_c_polypeptide_29
ENSMUSG00000058258	981.595	1119.56	819.38	2535.71	2889.81	2376.69	1.28758	1.25e-23	6.18e-20	Idi1	chr13	+	8885501	8892451	3505	protein_coding	isopentenyl-diphosphate_delta_isomerase
ENSMUSG00000027954	390.177	396.606	360.968	1026.76	820.861	870.097	1.13992	1.91e-20	6.36e-17	Efna1	chr3	-	89271733	89281142	1830	protein_coding	ephrin_A1
ENSMUSG00000032816	301.421	453.264	558.398	41.5691	43.0375	95.3677	-1.91466	2.14e-20	6.36e-17	Igdcc4	chr9	+	65101486	65137940	6366	protein_coding	immunoglobulin_superfamily_DCC_subclass_member_4
ENSMUSG00000030498	597.569	509.922	516.879	1035.07	1229.19	1129.41	0.981583	5.72e-17	1.41e-13	Gas2	chr7	+	51862015	51994975	4993	protein_coding	growth_arrest_specific_2
ENSMUSG00000027952	686.325	712.757	643.133	1229.4	1460.13	1289.07	0.89935	3.26e-16	6.9e-13	Pmvk	chr3	+	89454541	89469013	1713	protein_coding	phosphomevalonate_kinase
ENSMUSG00000025473	1291.8	1198.88	1025.28	539.358	586.779	463.98	-1.03798	7.17e-16	1.33e-12	Adam8	chr7	-	139978932	139992562	4638	protein_coding	a_disintegrin_and_metallopeptidase_domain_8
ENSMUSG00000037071	5762.15	5236.33	3435.97	30786	50195.4	25868.2	1.67287	1.61e-14	2.66e-11	Scd1	chr19	-	44394451	44407709	4836	protein_coding	stearoyl-Coenzyme_A_desaturase_1
ENSMUSG00000024378	1377.04	1479.91	1170.18	2364.24	2756.5	2897.46	0.914257	3.49e-14	5.18e-11	Stard4	chr18	-	33199355	33213862	5586	protein_coding	StAR-related_lipid_transfer_(START)_domain_containing_4
ENSMUSG00000030701	317.239	367.144	338.089	651.595	662.357	630.07	0.861467	7.97e-14	1.08e-10	Plekhb1	chr7	-	100642892	100662414	3713	protein_coding	pleckstrin_homology_domain_containing_family_B_(evectins)_member_1
ENSMUSG00000024799	829.566	1278.2	1010.88	2601.18	2519.27	2121.66	1.07068	1.09e-13	1.34e-10	Tm7sf2	chr19	-	6062821	6068373	3484	protein_coding	transmembrane_7_superfamily_member_2
ENSMUSG00000032350	4091.59	4660.68	4143.5	7388.9	7247.09	6747.53	0.695041	2.08e-13	2.38e-10	Gclc	chr9	+	77754535	77794485	3423	protein_coding	glutamate-cysteine_ligase_catalytic_subunit
ENSMUSG00000022351	1363.86	1381.32	1128.66	2500.38	2287.29	2263.11	0.807163	2.92e-13	3.1e-10	Sqle	chr15	+	59315077	59331192	5546	protein_coding	squalene_epoxidase
ENSMUSG00000066441	597.569	617.572	552.467	1172.25	1046.55	1004.04	0.809276	3.25e-13	3.21e-10	Rdh11	chr12	-	79174337	79192293	3455	protein_coding	retinol_dehydrogenase_11
ENSMUSG00000026385	11385.4	12200.7	10605.3	18625	21044.3	18149.9	0.717543	6.15e-13	5.08e-10	Dbi	chr1	-	120113280	120121078	1422	protein_coding	diazepam_binding_inhibitor
ENSMUSG00000090555	493.873	610.773	793.112	217.198	149.057	255.028	-1.28285	6.15e-13	5.08e-10	Gm8893	chr12	-	103817856	103822243	1242	unprocessed_pseudogene	predicted_gene_8893
ENSMUSG00000038539	5313.97	5257.86	4562.94	12419.8	11935	8385.93	0.992342	6.38e-13	5.08e-10	Atf5	chr7	-	44812256	44816658	1993	protein_coding	activating_transcription_factor_5
ENSMUSG00000034936	408.632	359.211	519.421	1098.46	838.706	1080.12	1.0681	6.66e-13	5.08e-10	Arl4d	chr11	+	101665541	101667832	1382	protein_coding	ADP-ribosylation_factor-like_4D
ENSMUSG00000024694	869.111	965.452	1038.84	2372.55	2760.7	1690.9	1.0817	6.85e-13	5.08e-10	Keg1	chr19	+	12695786	12719902	5664	protein_coding	kidney_expressed_gene_1
ENSMUSG00000031349	1015.87	1306.53	800.738	2368.4	2505.62	2248.11	1.04328	9.13e-13	6.29e-10	Nsdhl	chrX	+	72918557	72958514	2853	protein_coding	NAD(P)_dependent_steroid_dehydrogenase-like
ENSMUSG00000001467	2916.66	3163.78	2173.43	5793.69	5531.89	5431.67	0.925653	9.34e-13	6.29e-10	Cyp51	chr5	-	4081145	4104746	4415	protein_coding	cytochrome_P450_family_51
ENSMUSG00000093930	5571.45	6194.98	4201.12	14069	12224.7	10089.7	1.04133	9.75e-13	6.29e-10	Hmgcs1	chr13	+	119690462	119708086	3233	protein_coding	3-hydroxy-3-methylglutaryl-Coenzyme_A_synthase_1
ENSMUSG00000029201	3405.26	3121.85	3045.35	6264.46	5263.17	5200.22	0.755853	1.22e-12	7.53e-10	Ugdh	chr5	-	65413221	65435949	6752	protein_coding	UDP-glucose_dehydrogenase
ENSMUSG00000047963	2196.94	2081.61	2003.96	3365.01	3496.53	3180.35	0.646389	1.74e-12	1.04e-09	Stbd1	chr5	+	92603041	92606579	2221	protein_coding	starch_binding_domain_1
ENSMUSG00000035356	1005.32	871.4	984.612	557.025	534.295	533.631	-0.764675	2.26e-12	1.29e-09	Nfkbiz	chr16	-	55811375	55838899	5018	protein_coding	nuclear_factor_of_kappa_light_polypeptide_gene_enhancer_in_B_cells_inhibitor_zeta
ENSMUSG00000027605	1221.5	1498.04	1294.74	2388.14	3017.87	2369.19	0.870572	4.15e-12	2.28e-09	Acss2	chr2	+	155517948	155585724	10163	protein_coding	acyl-CoA_synthetase_short-chain_family_member_2
ENSMUSG00000049580	2397.31	2495.22	3384.28	1234.6	1341.51	1468.02	-0.924827	1.07e-11	5.48e-09	Tsku	chr7	-	98350668	98361328	3050	protein_coding	tsukushi_small_leucine_rich_proteoglycan
ENSMUSG00000069919	62657.7	32272.4	44222.8	17630.5	20126.8	15903.9	-1.13773	1.07e-11	5.48e-09	Hba-a1	chr11	+	32283511	32284465	812	protein_coding	hemoglobin_alpha_adult_chain_1
ENSMUSG00000053687	299.663	269.692	237.256	125.746	119.665	108.226	-1.02075	3.52e-11	1.74e-08	Dpep2	chr8	-	105984944	105996423	4540	protein_coding	dipeptidase_2
ENSMUSG00000089672	870.869	892.93	789.723	444.789	527.997	455.408	-0.773849	4.49e-11	2.15e-08	Lilr4b	chr10	+	51480632	51486316	2107	protein_coding	leukocyte_immunoglobulin-like_receptor_subfamily_B_member_4B
ENSMUSG00000023832	1167.9	1273.67	1065.11	1834.23	2172.87	2012.37	0.727935	5.74e-11	2.66e-08	Acat2	chr17	-	12942890	12960747	2544	protein_coding	acetyl-Coenzyme_A_acetyltransferase_2
ENSMUSG00000059824	2062.49	1968.3	2042.94	3049.09	3805.14	3267.15	0.691008	9.86e-11	4.43e-08	Dbp	chr7	+	45705247	45710203	1678	protein_coding	D_site_albumin_promoter_binding_protein
ENSMUSG00000031604	2624.03	3095.79	2257.32	4857.34	4513.69	4939.83	0.776274	1.11e-10	4.85e-08	Msmo1	chr8	-	64718139	64733792	6144	protein_coding	methylsterol_monoxygenase_1
ENSMUSG00000032418	732.022	705.958	488.916	1210.7	1481.12	1994.15	1.0599	2.72e-10	1.15e-07	Me1	chr9	-	86581371	86695953	3848	protein_coding	malic_enzyme_1_NADP(+)-dependent_cytosolic
ENSMUSG00000042745	1239.08	839.671	907.503	540.398	438.772	427.547	-0.940664	4.86e-10	1.96e-07	Id1	chr2	+	152736251	152737410	1160	protein_coding	inhibitor_of_DNA_binding_1
ENSMUSG00000069601	414.783	483.859	411.808	776.302	706.445	850.809	0.764685	4.88e-10	1.96e-07	Ank3	chr10	+	69533772	70027438	33152	protein_coding	ankyrin_3_epithelial
ENSMUSG00000087141	838.354	965.452	977.833	1464.27	1466.42	1501.24	0.63416	6.88e-10	2.69e-07	Plcxd2	chr16	-	45959263	46010218	7140	protein_coding	phosphatidylinositol-specific_phospholipase_C_X_domain_containing_2
ENSMUSG00000040127	425.328	342.214	460.954	721.223	834.507	746.869	0.814079	7.29e-10	2.77e-07	Sdr9c7	chr10	+	127898518	127911761	3038	protein_coding	4short_chain_dehydrogenase/reductase_family_9C_member_7
ENSMUSG00000021273	2190.79	2721.85	1801.45	4058.18	4413.97	4201.54	0.824048	7.82e-10	2.9e-07	Fdft1	chr14	-	63145153	63177793	2860	protein_coding	farnesyl_diphosphate_farnesyl_transferase_1
ENSMUSG00000054422	34473.6	35645.8	36815.3	50346.4	51064.5	56780.2	0.54145	9.55e-10	3.41e-07	Fabp1	chr6	+	71199827	71205023	553	protein_coding	fatty_acid_binding_protein_1_liver
ENSMUSG00000026796	2395.55	2465.75	2180.21	1486.09	1563	1311.57	-0.648787	9.66e-10	3.41e-07	Fam129b	chr2	+	32876114	32925254	4672	protein_coding	family_with_sequence_similarity_129_member_B
ENSMUSG00000024039	3245.33	3971.72	4117.24	7747.43	7174.66	5778.86	0.787319	1.19e-09	4.12e-07	Cbs	chr17	-	31612623	31637199	3343	protein_coding	cystathionine_beta-synthase
ENSMUSG00000049723	9865.16	9714.57	8845.4	6263.42	6105.03	5013.77	-0.663267	1.35e-09	4.56e-07	Mmp12	chr9	+	7344381	7369499	7237	protein_coding	matrix_metallopeptidase_12
ENSMUSG00000040170	8274.57	4316.2	6582.15	2532.59	1892.6	3077.48	-1.07833	1.49e-09	4.91e-07	Fmo2	chr1	-	162874317	162898726	5609	protein_coding	flavin_containing_monooxygenase_2
ENSMUSG00000039109	262.755	222.099	183.026	91.4519	98.6713	93.2246	-1.01833	1.54e-09	4.96e-07	F13a1	chr13	-	36867178	37050244	3927	protein_coding	coagulation_factor_XIII_A1_subunit
ENSMUSG00000027996	212.664	41.9269	58.4666	8.31381	6.29817	7.50083	-1.31336	1.57e-09	4.97e-07	Sfrp2	chr3	+	83766321	83774316	2153	protein_coding	secreted_frizzled-related_protein_2
ENSMUSG00000063011	4492.31	2509.95	3997.76	1796.82	1617.58	1609.46	-0.958603	1.79e-09	5.44e-07	Msln	chr17	-	25748614	25754327	2114	protein_coding	mesothelin
ENSMUSG00000069917	10446.9	5326.98	5900.04	3132.23	3056.71	2465.63	-1.06219	1.8e-09	5.44e-07	Hba-a2	chr11	+	32296489	32297298	667	protein_coding	hemoglobin_alpha_adult_chain_2
ENSMUSG00000006445	1454.38	1224.95	1511.66	707.713	341.151	617.211	-1.0635	2.09e-09	6.21e-07	Epha2	chr4	+	141301240	141329384	4674	protein_coding	Eph_receptor_A2
ENSMUSG00000049598	678.416	666.298	578.735	140.296	323.306	128.586	-1.20316	2.17e-09	6.28e-07	Vsig8	chr1	+	172555938	172563717	1879	protein_coding	V-set_and_immunoglobulin_domain_containing_8
ENSMUSG00000071551	856.808	991.514	802.433	1345.8	1707.85	1823.77	0.793278	2.2e-09	6.28e-07	Akr1c19	chr13	+	4228700	4248681	1730	protein_coding	aldo-keto_reductase_family_1_member_C19
ENSMUSG00000054474	939.414	954.12	880.388	1389.45	1566.14	1387.65	0.610833	2.45e-09	6.81e-07	Thnsl2	chr6	-	71128166	71144439	2164	protein_coding	threonine_synthase-like_2_(bacterial)
ENSMUSG00000029380	865.596	658.366	501.627	319.042	306.511	258.243	-0.992646	2.48e-09	6.81e-07	Cxcl1	chr5	+	90891241	90893115	1875	protein_coding	chemokine_(C-X-C_motif)_ligand_1
ENSMUSG00000028521	1622.22	1596.62	1826.87	2741.48	2589.6	2468.85	0.59431	2.58e-09	6.97e-07	Slc35d1	chr4	-	103170649	103215164	8528	protein_coding	solute_carrier_family_35_(UDP-glucuronic_acid/UDP-N-acetylgalactosamine_dual_transporter)_member_D1
ENSMUSG00000015806	2464.09	2822.7	2608.12	3874.24	4336.29	3898.29	0.585396	2.74e-09	7.27e-07	Qdpr	chr5	-	45434021	45450236	1788	protein_coding	quinoid_dihydropteridine_reductase
ENSMUSG00000072596	477.176	456.663	431.297	256.689	277.119	245.384	-0.738722	3e-09	7.81e-07	Ear2	chr14	+	44102654	44103534	719	protein_coding	eosinophil-associated_ribonuclease_A_family_member_2
ENSMUSG00000052305	87895.4	40712.1	57043.1	25293.7	27697.2	21636.7	-1.04967	3.55e-09	9.08e-07	Hbb-bs	chr7	-	103826534	103828096	863	protein_coding	hemoglobin_beta_adult_s_chain
ENSMUSG00000046794	2056.34	1994.36	2855.54	531.045	849.203	1189.42	-1.09827	3.84e-09	9.65e-07	Ppp1r3b	chr8	+	35375741	35388124	4206	protein_coding	protein_phosphatase_1_regulatory_(inhibitor)_subunit_3B
ENSMUSG00000032018	5795.54	7034.65	5624.66	9318.74	10309.1	10028.6	0.640284	4.48e-09	1.11e-06	Sc5d	chr9	-	42254177	42264300	2328	protein_coding	sterol-C5-desaturase_(fungal_ERG3_delta-5-desaturase)_homolog_(S._cerevisae)
ENSMUSG00000041220	1209.2	1061.77	990.543	1765.65	2621.09	1912.71	0.836597	5.62e-09	1.35e-06	Elovl6	chr3	+	129532355	129638495	6431	protein_coding	ELOVL_family_member_6_elongation_of_long_chain_fatty_acids_(yeast)
ENSMUSG00000038526	124.786	135.979	136.422	267.081	333.803	238.955	0.919625	5.73e-09	1.35e-06	Car14	chr3	-	95897768	95904691	2543	protein_coding	carbonic_anhydrase_14
ENSMUSG00000048489	755.749	1394.92	1459.97	3798.37	2823.68	2495.63	1.05368	5.83e-09	1.35e-06	8430408G22Rik	chr6	+	116650609	116652794	1358	protein_coding	RIKEN_cDNA_8430408G22_gene
ENSMUSG00000052562	833.081	920.125	1025.28	1462.19	1904.15	1541.96	0.745375	5.84e-09	1.35e-06	Slc22a30	chr19	-	8335371	8405111	3368	protein_coding	solute_carrier_family_22_member_30
ENSMUSG00000031168	2407.85	2438.56	2777.59	3754.72	3867.08	3765.42	0.550589	6.71e-09	1.53e-06	Ebp	chrX	-	8185329	8193512	2310	protein_coding	phenylalkylamine_Ca2+_antagonist_(emopamil)_binding_protein
ENSMUSG00000014444	1254.02	993.781	1223.56	638.085	643.463	740.439	-0.714383	8.15e-09	1.82e-06	Piezo1	chr8	-	122481698	122551329	9933	protein_coding	piezo-type_mechanosensitive_ion_channel_component_1
ENSMUSG00000050335	9909.1	10052.3	8457.32	5815.51	6466.12	5186.29	-0.652782	8.21e-09	1.82e-06	Lgals3	chr14	+	47367751	47386160	1858	protein_coding	lectin_galactose_binding_soluble_3
ENSMUSG00000069833	4793.73	3235.17	4200.27	2239.53	2257.89	2365.98	-0.752331	1.09e-08	2.39e-06	Ahnak	chr19	+	8989284	9076919	18543	protein_coding	AHNAK_nucleoprotein_(desmoyokin)
ENSMUSG00000036216	608.114	668.564	520.268	963.363	1180.91	999.754	0.733873	1.14e-08	2.46e-06	Leap2	chr11	-	53422181	53423170	531	protein_coding	liver-expressed_antimicrobial_peptide_2
ENSMUSG00000023088	536.933	456.663	449.091	295.14	248.778	261.458	-0.75716	1.29e-08	2.73e-06	Abcc1	chr16	+	14361558	14475737	12366	protein_coding	ATP-binding_cassette_sub-family_C_(CFTR/MRP)_member_1
ENSMUSG00000043681	279.451	377.342	267.76	598.594	535.344	623.641	0.819253	1.33e-08	2.78e-06	Fam25c	chr14	-	34351881	34355433	408	protein_coding	family_with_sequence_similarity_25_member_C
ENSMUSG00000044468	973.686	674.23	852.426	439.593	414.629	485.411	-0.798857	1.49e-08	3.07e-06	Fam46c	chr3	-	100451628	100489324	6097	protein_coding	family_with_sequence_similarity_46_member_C
ENSMUSG00000019312	1429.77	1981.9	1391.34	2798.64	2784.84	2972.47	0.751109	1.54e-08	3.13e-06	Grb7	chr11	+	98446394	98455373	3365	protein_coding	growth_factor_receptor_bound_protein_7
ENSMUSG00000069874	1137.14	1159.22	1194.75	1855.02	1615.48	1766.98	0.554698	1.75e-08	3.5e-06	Irgm2	chr11	+	58199618	58222782	3690	protein_coding	immunity-related_GTPase_family_M_member_2
ENSMUSG00000040809	181.028	122.381	134.727	55.079	61.932	51.4343	-1.05576	1.82e-08	3.6e-06	Chil3	chr3	-	106147554	106167564	1632	protein_coding	chitinase-like_3
ENSMUSG00000015568	9194.65	9461.88	8019.25	5705.35	5531.89	4137.24	-0.721331	1.98e-08	3.87e-06	Lpl	chr8	+	68880491	68907448	6810	protein_coding	lipoprotein_lipase
ENSMUSG00000022102	565.933	523.52	497.39	304.493	338.002	305.391	-0.682389	2.02e-08	3.9e-06	Dok2	chr14	+	70766036	70778495	2902	protein_coding	docking_protein_2
ENSMUSG00000031328	6753.41	6317.36	5619.57	4252.51	4200.88	3861.86	-0.568424	2.1e-08	3.96e-06	Flna	chrX	-	74223461	74249820	9400	protein_coding	filamin_alpha
ENSMUSG00000023070	9300.98	12268.7	10701.9	16059.2	18458.9	18067.4	0.652095	2.11e-08	3.96e-06	Rgn	chrX	+	20549787	20562089	1607	protein_coding	regucalcin
ENSMUSG00000021948	1842.8	1738.27	1530.3	1088.07	1132.62	1090.84	-0.588367	2.32e-08	4.3e-06	Prkcd	chr14	-	30595356	30626210	4983	protein_coding	protein_kinase_C_delta
ENSMUSG00000049130	626.569	496.324	560.94	338.788	323.306	268.958	-0.764427	2.42e-08	4.43e-06	C5ar1	chr7	-	16246743	16259540	2570	protein_coding	complement_component_5a_receptor_1
ENSMUSG00000042010	694.234	830.606	883.778	1317.74	1496.86	1239.78	0.687544	2.78e-08	5.03e-06	Acacb	chr5	+	114146535	114250761	9632	protein_coding	acetyl-Coenzyme_A_carboxylase_beta
ENSMUSG00000032207	1470.2	1576.22	1731.12	2851.64	2550.76	2275.97	0.635007	3.18e-08	5.68e-06	Lipc	chr9	-	70798129	70934808	1919	protein_coding	lipase_hepatic
ENSMUSG00000092274	7762.24	7185.36	6744	4914.5	4637.55	3720.41	-0.653851	3.39e-08	5.94e-06	Neat1	chr19	-	5824708	5845478	20771	lincRNA	nuclear_paraspeckle_assembly_transcript_1_(non-protein_coding)
ENSMUSG00000007655	1703.95	1074.24	1126.96	697.321	471.313	633.285	-0.923878	3.4e-08	5.94e-06	Cav1	chr6	+	17306335	17341452	3444	protein_coding	caveolin_1_caveolae_protein
ENSMUSG00000000290	4364.01	4323	3505.45	2448.42	2748.1	2249.18	-0.655712	3.58e-08	6.18e-06	Itgb2	chr10	+	77530252	77565708	3052	protein_coding	integrin_beta_2
ENSMUSG00000046718	4006.35	3806.28	4766.3	8741.97	7293.28	6156.04	0.735849	3.81e-08	6.5e-06	Bst2	chr8	-	71534264	71537437	764	protein_coding	bone_marrow_stromal_cell_antigen_2
ENSMUSG00000040891	1709.22	2011.36	2289.52	1206.54	999.31	1255.85	-0.719289	3.85e-08	6.5e-06	Foxa3	chr7	-	19013284	19023538	2037	protein_coding	forkhead_box_A3
ENSMUSG00000026669	1641.56	1535.43	1539.62	2153.28	2738.65	2547.07	0.612538	4.01e-08	6.69e-06	Mcm10	chr2	-	4989714	5012791	7692	protein_coding	minichromosome_maintenance_deficient_10_(S._cerevisiae)
ENSMUSG00000045689	811.112	350.146	255.897	10.3923	8.39756	2.14309	-1.10154	4.49e-08	7.4e-06	Pcdhb4	chr18	+	37307455	37311172	3718	protein_coding	protocadherin_beta_4
ENSMUSG00000008348	2284.82	2528.08	2368.32	3845.14	3516.48	5033.06	0.712402	4.55e-08	7.42e-06	Ubc	chr5	-	125385965	125390202	2893	protein_coding	ubiquitin_C
ENSMUSG00000048612	1627.5	1604.55	1449.8	1068.32	1083.29	998.682	-0.540408	6.66e-08	1.07e-05	Myof	chr19	-	37899036	38043577	7109	protein_coding	myoferlin
ENSMUSG00000030789	1332.23	1570.56	1225.26	875.029	877.545	795.088	-0.640872	6.93e-08	1.11e-05	Itgax	chr7	+	128129547	128150657	4803	protein_coding	integrin_alpha_X
ENSMUSG00000026866	1866.52	1869.71	1963.29	2688.48	2947.54	2586.72	0.503434	9.87e-08	1.56e-05	Kynu	chr2	+	43555329	43682715	6149	protein_coding	kynureninase_(L-kynurenine_hydrolase)
ENSMUSG00000024026	2873.6	2962.08	2969.09	4355.4	4460.15	3851.14	0.499842	1.16e-07	1.82e-05	Glo1	chr17	-	30592866	30612659	1935	protein_coding	glyoxalase_1
ENSMUSG00000045282	613.387	691.227	787.181	1219.01	1223.94	1026.54	0.665483	1.19e-07	1.84e-05	Tmem86b	chr7	-	4628040	4631422	1917	protein_coding	transmembrane_protein_86B
ENSMUSG00000027048	3268.17	3262.37	3526.64	6909.82	4940.91	5096.28	0.682527	1.21e-07	1.85e-05	Abcb11	chr2	-	69238282	69342616	5146	protein_coding	ATP-binding_cassette_sub-family_B_(MDR/TAP)_member_11
ENSMUSG00000109511	514.085	507.655	486.374	319.042	327.505	303.248	-0.616783	1.22e-07	1.85e-05	Nup62	chr7	+	44816088	44830812	2854	protein_coding	nucleoporin_62
ENSMUSG00000054499	688.083	715.024	488.916	1107.82	1136.82	1084.41	0.728202	1.3e-07	1.95e-05	Dedd2	chr7	-	25199915	25220615	5981	protein_coding	death_effector_domain-containing_DNA_binding_protein_2
ENSMUSG00000040907	746.961	716.157	490.611	304.493	381.039	300.033	-0.836398	1.44e-07	2.13e-05	Atp1a3	chr7	-	24978167	25005958	5958	protein_coding	ATPase_Na+/K+_transporting_alpha_3_polypeptide
ENSMUSG00000039745	1540.5	1714.47	1426.92	2638.6	2216.96	2369.19	0.584438	1.47e-07	2.17e-05	Htatip2	chr7	+	49759115	49773975	2024	protein_coding	HIV-1_Tat_interactive_protein_2
ENSMUSG00000006800	874.384	781.88	850.731	504.025	454.518	582.922	-0.644038	1.49e-07	2.17e-05	Sulf2	chr2	-	166073089	166155663	5818	protein_coding	sulfatase_2
ENSMUSG00000020309	430.601	426.068	419.434	626.653	710.643	640.785	0.588874	1.58e-07	2.25e-05	Chac2	chr11	-	30976707	30986350	1315	protein_coding	ChaC_cation_transport_regulator_2
ENSMUSG00000029664	454.328	548.449	541.452	926.99	1190.35	771.514	0.785414	1.58e-07	2.25e-05	Tfpi2	chr6	-	3962595	3988919	1747	protein_coding	tissue_factor_pathway_inhibitor_2
ENSMUSG00000033105	1039.59	1184.15	971.054	1490.25	1841.16	1854.85	0.641678	1.63e-07	2.3e-05	Lss	chr10	+	76531588	76557138	10787	protein_coding	lanosterol_synthase
ENSMUSG00000086432	69.4234	126.914	85.5816	15.5884	34.6399	25.7171	-1.13085	1.69e-07	2.37e-05	B430119L08Rik	chr12	+	103895897	103898784	1994	antisense	RIKEN_cDNA_B430119L08_gene
ENSMUSG00000109564	736.416	417.003	859.205	251.493	228.833	340.752	-0.986268	1.74e-07	2.42e-05	Muc16	chr9	-	18495455	18674530	26350	protein_coding	mucin_16
ENSMUSG00000052688	634.478	659.499	566.025	421.926	361.095	352.539	-0.648545	2.16e-07	2.96e-05	Rab7b	chr1	+	131688695	131715439	4624	protein_coding	RAB7B_member_RAS_oncogene_family
ENSMUSG00000057751	556.266	335.415	453.328	253.571	194.194	182.163	-0.892528	2.22e-07	3e-05	Megf6	chr4	+	154170730	154275713	7877	protein_coding	multiple_EGF-like-domains_6
ENSMUSG00000035186	1877.95	1556.96	1782.81	1191.99	973.067	795.088	-0.725899	2.23e-07	3e-05	Ubd	chr17	+	37193892	37196095	931	protein_coding	ubiquitin_D
ENSMUSG00000006517	531.661	594.909	427.908	1115.09	1133.67	758.656	0.812542	2.45e-07	3.28e-05	Mvd	chr8	-	122433596	122443422	1761	protein_coding	mevalonate_(diphospho)_decarboxylase
ENSMUSG00000020532	1245.23	1213.61	1075.28	1617.04	2507.72	2187.03	0.737904	2.55e-07	3.37e-05	Acaca	chr11	+	84129672	84401651	17074	protein_coding	acetyl-Coenzyme_A_carboxylase_alpha
ENSMUSG00000037287	1417.47	1364.32	1331.17	2154.32	1989.17	1845.2	0.513238	2.56e-07	3.37e-05	Tbcel	chr9	-	42412316	42507809	5556	protein_coding	tubulin_folding_cofactor_E-like
ENSMUSG00000026489	1205.68	1796.06	1452.34	3391	2737.6	2288.83	0.79093	2.59e-07	3.37e-05	Adck3	chr1	-	180165238	180199602	5293	protein_coding	aarF_domain_containing_kinase_3
ENSMUSG00000034245	728.507	768.282	610.934	1134.84	1065.44	1079.05	0.592518	2.94e-07	3.79e-05	Hdac11	chr6	+	91156665	91174692	3849	protein_coding	histone_deacetylase_11
ENSMUSG00000024659	2592.39	2250.45	2143.78	1626.39	1504.21	1278.36	-0.610999	3.82e-07	4.88e-05	Anxa1	chr19	-	20373428	20390944	2608	protein_coding	annexin_A1
ENSMUSG00000022822	791.779	788.679	771.081	504.025	482.86	564.706	-0.560094	3.89e-07	4.94e-05	Abcc5	chr16	-	20331303	20426394	10592	protein_coding	ATP-binding_cassette_sub-family_C_(CFTR/MRP)_member_5
ENSMUSG00000040363	524.63	688.961	704.141	364.768	356.896	397.544	-0.693209	4.21e-07	5.29e-05	Bcor	chrX	-	12036740	12160355	7190	protein_coding	BCL6_interacting_corepressor
ENSMUSG00000025889	1221.5	496.324	769.387	326.317	382.089	256.1	-0.995709	4.33e-07	5.4e-05	Snca	chr6	-	60731575	60829855	2703	protein_coding	synuclein_alpha
ENSMUSG00000052435	213.543	279.89	235.561	475.966	505.953	366.469	0.768956	4.4e-07	5.44e-05	Cebpe	chr14	-	54710363	54712174	1238	protein_coding	CCAAT/enhancer_binding_protein_(C/EBP)_epsilon
ENSMUSG00000030084	887.566	905.394	897.335	587.163	558.438	654.716	-0.542911	4.87e-07	5.97e-05	Plxna1	chr6	-	89316314	89362620	9054	protein_coding	plexin_A1
ENSMUSG00000020889	700.386	602.841	658.385	1971.41	1260.68	956.892	0.876998	7.02e-07	8.54e-05	Nr1d1	chr11	-	98767932	98775333	3077	protein_coding	nuclear_receptor_subfamily_1_group_D_member_1
ENSMUSG00000038260	409.51	556.381	479.596	234.865	186.846	306.463	-0.821143	7.56e-07	9.12e-05	Trpm4	chr7	-	45303155	45333780	4245	protein_coding	transient_receptor_potential_cation_channel_subfamily_M_member_4
ENSMUSG00000039145	600.205	652.7	665.164	965.441	996.16	880.812	0.531979	8.17e-07	9.71e-05	Camk1d	chr2	-	5293457	5714515	7427	protein_coding	calcium/calmodulin-dependent_protein_kinase_ID
ENSMUSG00000037797	2714.54	2991.54	2591.17	3785.9	3839.78	3977.58	0.461713	8.19e-07	9.71e-05	Adh4	chr3	+	138415466	138430892	1450	protein_coding	alcohol_dehydrogenase_4_(class_II)_pi_polypeptide
ENSMUSG00000038894	382.268	410.204	516.879	807.479	694.898	1300.86	0.876267	8.25e-07	9.71e-05	Irs2	chr8	-	10984681	11008458	6323	protein_coding	insulin_receptor_substrate_2
ENSMUSG00000027895	237.27	123.514	190.652	82.0989	54.5841	78.223	-0.979633	8.45e-07	9.87e-05	Kcnc4	chr3	-	107438303	107459552	3667	protein_coding	potassium_voltage_gated_channel_Shaw-related_subfamily_member_4
ENSMUSG00000058135	21315.6	24287	24717.8	47799.2	35088.2	33451.6	0.653759	8.83e-07	0.00010234	Gstm1	chr3	-	108012255	108017973	1473	protein_coding	glutathione_S-transferase_mu_1
ENSMUSG00000005413	3453.6	3268.03	2998.74	1742.78	2283.09	2213.82	-0.588374	1e-06	0.00011554	Hmox1	chr8	+	75093591	75100596	2161	protein_coding	heme_oxygenase_1
ENSMUSG00000004098	295.269	284.423	261.829	420.887	451.369	451.121	0.599069	1.06e-06	0.00012114	Col5a3	chr9	-	20770050	20815067	6809	protein_coding	collagen_type_V_alpha_3
ENSMUSG00000027318	423.571	369.41	394.014	216.159	198.392	270.03	-0.700632	1.08e-06	0.00012239	Adam33	chr2	-	131050591	131063814	5394	protein_coding	a_disintegrin_and_metallopeptidase_domain_33
ENSMUSG00000059434	2594.15	2938.28	2925.87	3861.76	4099.06	3841.5	0.458188	1.09e-06	0.00012239	Gckr	chr5	+	31297443	31327314	4335	protein_coding	glucokinase_regulatory_protein
ENSMUSG00000032584	211.785	166.574	192.347	92.4911	72.4289	110.369	-0.851305	1.1e-06	0.00012239	Mst1r	chr9	+	107906873	107920383	5007	protein_coding	macrophage_stimulating_1_receptor_(c-met-related_tyrosine_kinase)
ENSMUSG00000086265	59.7569	77.0548	56.7719	118.472	154.305	147.874	0.883345	1.27e-06	0.00013948	Marcksl1-ps4	chr13	+	4248735	4249025	291	processed_pseudogene	MARCKS-like_1_pseudogene_4
ENSMUSG00000025804	182.786	165.441	138.117	84.1773	79.7768	75.0083	-0.833606	1.27e-06	0.00013948	Ccr1	chr9	-	123962126	123968692	2831	protein_coding	chemokine_(C-C_motif)_receptor_1
ENSMUSG00000025937	3201.39	4174.56	3519.86	5184.7	5946.52	5442.39	0.560798	1.34e-06	0.00014643	Lactb2	chr1	-	13623330	13660546	4566	protein_coding	lactamase_beta_2
ENSMUSG00000041012	853.293	1009.64	1001.56	1375.94	1400.29	1386.58	0.507646	1.4e-06	0.00015103	Cmtm8	chr9	-	114789345	114844152	1064	protein_coding	CKLF-like_MARVEL_transmembrane_domain_containing_8
ENSMUSG00000006574	204.755	99.718	158.453	63.3928	64.0314	39.6473	-0.997476	1.4e-06	0.00015103	Slc4a1	chr11	-	102348824	102366203	4891	protein_coding	solute_carrier_family_4_(anion_exchanger)_member_1
ENSMUSG00000072812	455.207	371.676	520.268	273.317	261.374	249.671	-0.689797	1.55e-06	0.00016499	Ahnak2	chr12	-	112772194	112802657	14163	protein_coding	AHNAK_nucleoprotein_2
ENSMUSG00000029822	973.686	1235.14	1076.97	682.772	732.687	735.082	-0.563988	1.57e-06	0.00016499	Osbpl3	chr6	-	50293330	50456201	9021	protein_coding	oxysterol_binding_protein-like_3
ENSMUSG00000058254	550.115	603.974	598.224	851.126	815.613	874.383	0.504767	1.57e-06	0.00016499	Tspan7	chrX	+	10485158	10596605	7067	protein_coding	tetraspanin_7
ENSMUSG00000028645	640.629	613.039	581.277	438.554	355.847	381.471	-0.588168	1.6e-06	0.00016753	Slc2a1	chr4	+	119108711	119137983	3506	protein_coding	solute_carrier_family_2_(facilitated_glucose_transporter)_member_1
ENSMUSG00000012428	8664.75	8947.43	9981.69	6989.84	5753.38	5332.02	-0.563894	1.62e-06	0.00016858	Steap4	chr5	+	7960457	7982213	3155	protein_coding	STEAP_family_member_4
ENSMUSG00000030306	691.598	302.554	630.423	263.963	179.498	219.667	-0.943145	1.67e-06	0.00017237	Tmtc1	chr6	-	148232430	148444389	8578	protein_coding	transmembrane_and_tetratricopeptide_repeat_containing_1
ENSMUSG00000041939	895.475	1102.56	829.548	1556.76	1516.81	1359.79	0.594415	1.83e-06	0.00018686	Mvk	chr5	+	114444269	114460591	2675	protein_coding	mevalonate_kinase
ENSMUSG00000020911	798.809	439.666	584.666	339.827	264.523	168.233	-0.921749	1.87e-06	0.00018926	Krt19	chr11	-	100140810	100148665	1855	protein_coding	keratin_19
ENSMUSG00000047822	2983.45	1142.22	2003.12	564.3	546.891	350.396	-1.05559	1.89e-06	0.00018926	Angptl8	chr9	+	21835510	21837346	864	protein_coding	angiopoietin-like_8
ENSMUSG00000040026	1801.49	1888.98	1859.07	1325.01	1103.23	830.449	-0.67822	1.89e-06	0.00018926	Saa3	chr7	-	46711998	46715676	531	protein_coding	serum_amyloid_A_3
ENSMUSG00000003528	5502.91	5810.84	5150.99	7320.31	8529.82	7467.61	0.475366	1.9e-06	0.00018926	Slc25a1	chr16	-	17925211	17928219	2176	protein_coding	solute_carrier_family_25_(mitochondrial_carrier_citrate_transporter)_member_1
ENSMUSG00000046949	1295.32	1391.52	1202.38	1719.92	1925.14	1953.43	0.495274	2.16e-06	0.00021346	Nqo2	chr13	+	33964659	33988465	3974	protein_coding	NAD(P)H_dehydrogenase_quinone_2
ENSMUSG00000030087	1521.16	2128.07	1738.75	2719.66	2719.76	3138.56	0.609278	2.22e-06	0.00021865	Klf15	chr6	+	90462576	90475238	2791	protein_coding	Kruppel-like_factor_15
ENSMUSG00000038357	39.545	81.5875	106.765	17.6668	24.143	8.57238	-1.0459	2.4e-06	0.0002331	Camp	chr9	-	109847379	109849617	758	protein_coding	cathelicidin_antimicrobial_peptide
ENSMUSG00000023994	699.507	635.702	642.285	479.083	413.58	408.26	-0.557835	2.4e-06	0.0002331	Nfya	chr17	-	48386885	48409906	7315	protein_coding	nuclear_transcription_factor-Y_alpha
ENSMUSG00000039809	293.512	368.277	350.8	547.672	510.152	533.631	0.595978	2.43e-06	0.00023413	Gabbr2	chr4	-	46662305	46991873	6686	protein_coding	gamma-aminobutyric_acid_(GABA)_B_receptor_2
ENSMUSG00000062624	2773.42	2539.41	2885.2	4930.09	3724.32	3921.86	0.567392	2.59e-06	0.00024779	Cyp2c67	chr19	-	39608842	39649051	1732	protein_coding	cytochrome_P450_family_2_subfamily_c_polypeptide_67
ENSMUSG00000054342	371.723	279.89	291.486	188.1	183.697	153.231	-0.726357	2.62e-06	0.0002488	Kcnn4	chr7	+	24370263	24386690	5115	protein_coding	potassium_intermediate/small_conductance_calcium-activated_channel_subfamily_N_member_4
ENSMUSG00000063704	101.059	84.9869	88.9709	229.669	185.796	148.945	0.829472	2.7e-06	0.00025534	Mapk15	chr15	+	75993769	75999152	2561	protein_coding	mitogen-activated_protein_kinase_15
ENSMUSG00000006360	1986.92	1358.66	1617.58	1122.36	897.489	927.96	-0.665227	2.72e-06	0.00025584	Crip1	chr12	+	113146316	113153879	2280	protein_coding	cysteine-rich_protein_1_(intestinal)
ENSMUSG00000027656	906.899	577.911	900.725	394.906	436.673	205.737	-0.899968	2.82e-06	0.00026288	Wisp2	chr2	+	163820861	163833146	1924	protein_coding	WNT1_inducible_signaling_pathway_protein_2
ENSMUSG00000030786	355.026	245.896	262.676	159.002	163.752	122.156	-0.78965	2.86e-06	0.00026539	Itgam	chr7	+	128062640	128118491	5024	protein_coding	integrin_alpha_M
ENSMUSG00000030302	23.727	21.53	11.8628	61.3144	48.286	113.584	1.03373	2.93e-06	0.00026999	Atp2b2	chr6	-	113743831	114042613	12612	protein_coding	ATPase_Ca++_transporting_plasma_membrane_2
ENSMUSG00000020437	997.413	844.204	682.11	520.652	524.847	442.549	-0.671043	2.97e-06	0.00026999	Myo1g	chr11	-	6506548	6520965	6957	protein_coding	myosin_IG
ENSMUSG00000026177	1863.89	1912.77	1692.99	1239.8	1382.45	1201.2	-0.485942	2.97e-06	0.00026999	Slc11a1	chr1	+	74375195	74386062	3705	protein_coding	solute_carrier_family_11_(proton-coupled_divalent_metal_ion_transporters)_member_1
ENSMUSG00000021136	1159.99	1239.68	1182.89	1678.35	1627.03	1584.82	0.429272	3.07e-06	0.00027746	Smoc1	chr12	+	81026808	81186414	3496	protein_coding	SPARC_related__modular_calcium_binding_1
ENSMUSG00000021252	1616.95	2007.96	1623.51	2630.28	2481.48	2587.79	0.516867	3.1e-06	0.00027752	0610007P14Rik	chr12	-	85815448	85824550	4235	protein_coding	RIKEN_cDNA_0610007P14_gene
ENSMUSG00000092341	4778.79	6652.78	7443.05	2716.54	3059.86	4276.55	-0.76167	3.11e-06	0.00027752	Malat1	chr19	-	5795690	5802672	6983	lincRNA	metastasis_associated_lung_adenocarcinoma_transcript_1_(non-coding_RNA)
ENSMUSG00000034837	521.994	603.974	587.208	758.635	969.918	995.468	0.60605	3.14e-06	0.00027752	Gnat1	chr9	-	107674474	107679712	3029	protein_coding	guanine_nucleotide_binding_protein_alpha_transducing_1
ENSMUSG00000063450	2477.27	1665.74	2589.48	1305.27	1187.2	1412.3	-0.687132	3.14e-06	0.00027752	Syne2	chr12	+	75818134	76110926	26726	protein_coding	spectrin_repeat_containing_nuclear_envelope_2
ENSMUSG00000092021	318.996	313.885	348.258	434.397	789.371	672.932	0.784037	3.22e-06	0.00028236	Gbp11	chr5	-	105323042	105346472	2692	polymorphic_pseudogene	guanylate_binding_protein_11
ENSMUSG00000030878	399.844	207.368	300.806	153.805	145.908	114.656	-0.870764	3.24e-06	0.00028269	Cdr2	chr7	-	120957036	120982312	5684	protein_coding	cerebellar_degeneration-related_2
ENSMUSG00000038206	746.082	839.671	749.05	1128.6	1190.35	1051.19	0.497964	3.26e-06	0.00028304	Fbxo8	chr8	+	56551090	56592393	3740	protein_coding	F-box_protein_8
ENSMUSG00000001025	1464.92	957.52	1082.06	651.595	755.78	582.922	-0.705973	3.36e-06	0.00028863	S100a6	chr3	+	90612882	90624181	1367	protein_coding	S100_calcium_binding_protein_A6_(calcyclin)
ENSMUSG00000052656	1209.2	1362.06	1204.07	1654.45	1909.39	1850.56	0.489762	3.37e-06	0.00028863	Rnf103	chr6	+	71493894	71510881	6602	protein_coding	ring_finger_protein_103
ENSMUSG00000103472	33.3936	15.8642	25.4203	2.07845	3.14908	2.14309	-0.985532	3.45e-06	0.00029421	Pcdhga7	chr18	+	37714764	37841873	5217	protein_coding	protocadherin_gamma_subfamily_A_7
ENSMUSG00000001755	2643.36	3502.6	3191.94	4787.72	4526.28	4549.79	0.529784	3.55e-06	0.00030099	Coasy	chr11	+	101082565	101086619	2867	protein_coding	Coenzyme_A_synthase
ENSMUSG00000028214	137.089	209.634	150.827	332.552	321.207	273.245	0.757481	3.62e-06	0.00030424	Gem	chr4	+	11704457	11714752	2104	protein_coding	GTP_binding_protein_(gene_overexpressed_in_skeletal_muscle)
ENSMUSG00000033159	1903.43	2014.76	1837.89	2625.09	2604.29	2520.28	0.411617	3.63e-06	0.00030424	Cnppd1	chr1	-	75134554	75142711	5635	protein_coding	cyclin_Pas1/PHO80_domain_containing_1
ENSMUSG00000001123	7364.16	8599.55	8085.34	13426.8	12981.6	10170.1	0.556735	3.68e-06	0.00030661	Lgals9	chr11	-	78962974	78984946	2137	protein_coding	lectin_galactose_binding_soluble_9
ENSMUSG00000002944	7394.04	7296.41	6251.69	5071.42	5067.93	4961.26	-0.447933	3.81e-06	0.00031617	Cd36	chr5	-	17781690	17888801	3590	protein_coding	CD36_antigen
ENSMUSG00000013584	157.301	95.1854	124.559	39.4906	24.143	64.2928	-0.982836	4.19e-06	0.00034525	Aldh1a2	chr9	+	71215789	71296243	2264	protein_coding	aldehyde_dehydrogenase_family_1_subfamily_A2
ENSMUSG00000027070	430.601	188.104	392.319	152.766	122.814	147.874	-0.910719	4.24e-06	0.00034761	Lrp2	chr2	-	69424340	69586065	16701	protein_coding	low_density_lipoprotein_receptor-related_protein_2
ENSMUSG00000068011	905.141	960.919	879.541	1358.27	1318.42	1199.06	0.470204	4.27e-06	0.0003478	Mkrn2os	chr6	-	115583544	115592576	2542	protein_coding	makorin_ring_finger_protein_2_opposite_strand
ENSMUSG00000031924	6481.87	6324.16	5654.31	8074.79	9262.51	8409.5	0.454823	4.31e-06	0.00034976	Cyb5b	chr8	+	107150661	107187470	4294	protein_coding	cytochrome_b5_type_B
ENSMUSG00000020182	300.542	318.418	369.441	1064.17	705.395	446.835	0.876934	4.46e-06	0.00035933	Ddc	chr11	-	11814101	11898144	4461	protein_coding	dopa_decarboxylase
ENSMUSG00000000567	298.784	358.078	333.853	226.551	174.249	165.018	-0.696511	4.52e-06	0.00036233	Sox9	chr11	+	112782224	112787760	4135	protein_coding	SRY_(sex_determining_region_Y)-box_9
ENSMUSG00000058454	1558.95	1711.07	1501.49	2453.61	2384.91	2045.58	0.495675	4.9e-06	0.00039109	Dhcr7	chr7	+	143823145	143848410	5817	protein_coding	7-dehydrocholesterol_reductase
ENSMUSG00000019880	190.695	175.64	195.736	312.807	283.418	311.82	0.617583	5.18e-06	0.00041068	Rspo3	chr10	-	29453109	29535867	2394	protein_coding	R-spondin_3
ENSMUSG00000026628	1130.11	1101.43	1251.52	846.969	794.619	660.073	-0.549773	5.29e-06	0.00041733	Atf3	chr1	-	191170296	191218039	2154	protein_coding	activating_transcription_factor_3
ENSMUSG00000071713	770.688	766.016	743.966	519.613	540.593	551.847	-0.471444	5.36e-06	0.00042086	Csf2rb	chr15	+	78325990	78351000	4764	protein_coding	colony_stimulating_factor_2_receptor_beta_low-affinity_(granulocyte-macrophage)
ENSMUSG00000008090	602.842	597.175	541.452	825.146	820.861	828.306	0.477335	5.39e-06	0.00042131	Fgfrl1	chr5	+	108692382	108706924	2782	protein_coding	fibroblast_growth_factor_receptor-like_1
ENSMUSG00000032808	252.209	333.149	243.187	616.261	375.791	791.874	0.850635	5.48e-06	0.00042423	Cyp2c38	chr19	-	39389556	39463075	2869	protein_coding	cytochrome_P450_family_2_subfamily_c_polypeptide_38
ENSMUSG00000063415	42.1813	37.3943	49.9932	95.6088	85.0253	138.23	0.914336	5.49e-06	0.00042423	Cyp26b1	chr6	-	84571414	84593908	5352	protein_coding	cytochrome_P450_family_26_subfamily_b_polypeptide_1
ENSMUSG00000024940	1815.56	1527.5	1685.36	1267.86	983.564	1061.9	-0.552845	5.56e-06	0.00042558	Ltbp3	chr19	+	5740904	5758532	5190	protein_coding	latent_transforming_growth_factor_beta_binding_protein_3
ENSMUSG00000046223	591.417	565.446	510.947	366.847	388.387	352.539	-0.543109	5.56e-06	0.00042558	Plaur	chr7	+	24462484	24475968	2617	protein_coding	plasminogen_activator_urokinase_receptor
ENSMUSG00000028780	1203.05	563.18	962.581	521.692	389.437	358.968	-0.847022	6.14e-06	0.00046534	Sema3c	chr5	+	17574281	17730268	7140	protein_coding	sema_domain_immunoglobulin_domain_(Ig)_short_basic_domain_secreted_(semaphorin)_3C
ENSMUSG00000030278	1623.1	1619.28	1722.65	1079.76	428.276	784.373	-0.851261	6.15e-06	0.00046534	Cidec	chr6	-	113424634	113435760	1856	protein_coding	cell_death-inducing_DFFA-like_effector_c
ENSMUSG00000059326	3449.2	3418.74	2999.59	2125.22	2550.76	2088.45	-0.506956	6.46e-06	0.00048626	Csf2ra	chr19	-	61224402	61228418	1849	protein_coding	colony_stimulating_factor_2_receptor_alpha_low-affinity_(granulocyte-macrophage)
ENSMUSG00000079316	1059.81	1167.15	1142.22	1449.72	1609.18	1666.26	0.460714	6.91e-06	0.00051823	Rab9	chrX	-	166457253	166479867	1749	protein_coding	RAB9_member_RAS_oncogene_family
ENSMUSG00000023169	324.269	307.086	305.043	190.178	200.492	203.594	-0.592205	6.96e-06	0.00051863	Slc38a1	chr15	-	96571418	96642913	8391	protein_coding	solute_carrier_family_38_member_1
ENSMUSG00000086771	32.5148	28.329	38.9777	69.6282	87.1247	87.8669	0.905132	7.15e-06	0.00053046	1700080G11Rik	chr4	+	127531622	127532885	436	lincRNA	RIKEN_cDNA_1700080G11_gene
ENSMUSG00000026170	4253.28	5296.39	5017.96	7657.02	6515.46	6952.2	0.499886	7.59e-06	0.0005597	Cyp27a1	chr1	+	74713574	74737892	2173	protein_coding	cytochrome_P450_family_27_subfamily_a_polypeptide_1
ENSMUSG00000049436	806.718	367.144	583.819	321.121	256.126	233.597	-0.848193	7.62e-06	0.0005597	Upk1b	chr16	-	38773184	38800203	1769	protein_coding	uroplakin_1B
ENSMUSG00000004933	241.664	220.966	175.4	133.021	92.3731	101.797	-0.777492	8.15e-06	0.00059545	Matk	chr10	+	81252935	81263365	4594	protein_coding	megakaryocyte-associated_tyrosine_kinase
ENSMUSG00000000555	816.385	901.995	990.543	657.83	575.233	594.709	-0.524485	8.19e-06	0.00059545	Itga5	chr15	-	103344289	103366763	4379	protein_coding	integrin_alpha_5_(fibronectin_receptor_alpha)
ENSMUSG00000030122	21753.3	21288.7	22967.2	28157.8	30137.8	27988.8	0.37217	8.34e-06	0.00060347	Ptms	chr6	-	124913681	124920103	1619	protein_coding	parathymosin
ENSMUSG00000020802	920.959	704.825	754.134	546.633	512.251	469.338	-0.579174	8.46e-06	0.00060928	Ube2o	chr11	-	116537740	116581447	5288	protein_coding	ubiquitin-conjugating_enzyme_E2O
ENSMUSG00000021069	5532.79	5904.89	5447.56	7458.53	8769.15	7311.17	0.452672	8.71e-06	0.00062139	Pygl	chr12	-	70190811	70231488	3828	protein_coding	liver_glycogen_phosphorylase
ENSMUSG00000024053	819.9	744.486	643.133	376.2	455.568	519.701	-0.627057	8.71e-06	0.00062139	Emilin2	chr17	-	71252176	71310965	3910	protein_coding	elastin_microfibril_interfacer_2
ENSMUSG00000040746	524.63	541.65	578.735	792.93	777.824	755.441	0.469309	8.88e-06	0.000629	Rnf167	chr11	+	70647235	70651421	3539	protein_coding	ring_finger_protein_167
ENSMUSG00000029186	352.39	375.076	377.067	545.594	516.45	546.489	0.50444	8.9e-06	0.000629	Pi4k2b	chr5	+	52741574	52769340	3760	protein_coding	phosphatidylinositol_4-kinase_type_2_beta
ENSMUSG00000005681	90085.3	114519	102410	139588	146678	146193	0.464972	9e-06	0.00063311	Apoa2	chr1	+	171225054	171226379	537	protein_coding	apolipoprotein_A-II
ENSMUSG00000026981	715.325	747.885	782.944	484.279	466.065	566.849	-0.523022	9.15e-06	0.00064069	Il1rn	chr2	+	24336853	24351494	5535	protein_coding	interleukin_1_receptor_antagonist
ENSMUSG00000047109	329.542	370.543	404.182	216.159	233.032	243.241	-0.602804	9.31e-06	0.00064824	Cldn14	chr16	-	93919031	94008837	1967	protein_coding	claudin_14
ENSMUSG00000039958	710.931	501.99	496.542	842.813	1103.23	963.321	0.665038	9.35e-06	0.00064824	Mettl20	chr6	+	149139849	149151171	2496	protein_coding	methyltransferase_like_20
ENSMUSG00000038871	3266.42	1800.59	2160.72	1349.95	1438.08	1101.55	-0.740336	9.71e-06	0.00066993	Bpgm	chr6	+	34476207	34505613	3588	protein_coding	23-bisphosphoglycerate_mutase
ENSMUSG00000024300	2185.52	2138.27	1743.83	1366.58	1466.42	1177.63	-0.546214	9.87e-06	0.0006783	Myo1f	chr17	+	33555719	33607764	4914	protein_coding	myosin_IF
ENSMUSG00000035930	491.237	213.034	305.043	184.982	106.019	85.7238	-0.929985	1.01e-05	0.0006878	Chst4	chr8	-	110029075	110039334	2000	protein_coding	carbohydrate_(chondroitin_6/keratan)_sulfotransferase_4
ENSMUSG00000031659	1067.72	1024.38	875.304	691.085	685.451	669.717	-0.49815	1.05e-05	0.00070922	Adcy7	chr8	+	88272403	88329962	6330	protein_coding	adenylate_cyclase_7
ENSMUSG00000032122	679.295	794.345	650.759	440.632	515.4	401.83	-0.580896	1.05e-05	0.00070922	Slc37a2	chr9	-	37229149	37255738	5079	protein_coding	solute_carrier_family_37_(glycerol-3-phosphate_transporter)_member_2
ENSMUSG00000029059	449.934	404.538	410.961	610.026	598.326	616.14	0.491137	1.05e-05	0.00070922	Fam213b	chr4	-	154895504	154899135	1027	protein_coding	family_with_sequence_similarity_213_member_B
ENSMUSG00000063558	1116.05	1547.9	1375.24	2058.71	1914.64	2197.74	0.55749	1.07e-05	0.00072177	Aox1	chr1	+	58029931	58106413	8690	protein_coding	aldehyde_oxidase_1
ENSMUSG00000026042	1332.23	1285	1003.25	835.538	783.072	754.369	-0.554707	1.09e-05	0.00072469	Col5a2	chr1	-	45374321	45503282	9591	protein_coding	collagen_type_V_alpha_2
ENSMUSG00000038167	291.754	299.154	367.746	542.476	501.754	466.123	0.587927	1.09e-05	0.00072469	Plekhg6	chr6	-	125362660	125380793	3299	protein_coding	pleckstrin_homology_domain_containing_family_G_(with_RhoGef_domain)_member_6
ENSMUSG00000026730	1299.71	1176.22	1053.25	1879.96	2262.09	1540.89	0.611448	1.09e-05	0.00072469	Pter	chr2	+	12924041	13003455	4682	protein_coding	phosphotriesterase_related
ENSMUSG00000031767	3726.02	3951.33	5195.05	9399.8	9721.22	5338.45	0.755354	1.11e-05	0.00073228	Nudt7	chr8	+	114133557	114154739	5618	protein_coding	nudix_(nucleoside_diphosphate_linked_moiety_X)-type_motif_7
ENSMUSG00000030161	4728.7	4891.85	4540.06	7833.69	6289.77	6218.19	0.487575	1.12e-05	0.00073228	Gabarapl1	chr6	+	129533160	129542346	2013	protein_coding	gamma-aminobutyric_acid_(GABA)_A_receptor-associated_protein-like_1
ENSMUSG00000061100	116.877	47.5927	73.7188	15.5884	10.4969	33.218	-0.973922	1.12e-05	0.00073228	Retnla	chr16	+	48842552	48844461	598	protein_coding	resistin_like_alpha
ENSMUSG00000034765	362.935	262.893	275.386	179.786	151.156	181.092	-0.694926	1.13e-05	0.00073228	Dusp5	chr19	+	53529109	53542431	2473	protein_coding	dual_specificity_phosphatase_5
ENSMUSG00000020027	589.66	497.457	410.961	759.674	811.414	799.374	0.593595	1.13e-05	0.00073228	Socs2	chr10	-	95385362	95417180	9531	protein_coding	suppressor_of_cytokine_signaling_2
ENSMUSG00000022178	879.657	636.836	1002.41	571.574	400.983	346.11	-0.759158	1.16e-05	0.00074575	Ajuba	chr14	-	54567469	54577661	3503	protein_coding	ajuba_LIM_protein
ENSMUSG00000038623	405.117	413.603	354.189	259.807	233.032	260.386	-0.575537	1.16e-05	0.00074737	Tm6sf1	chr7	+	81859001	81884434	5921	protein_coding	transmembrane_6_superfamily_member_1
ENSMUSG00000045294	4507.25	5393.84	3913.87	5912.16	8658.93	8622.74	0.651023	1.21e-05	0.00077533	Insig1	chr5	+	28071363	28078662	3093	protein_coding	insulin_induced_gene_1
ENSMUSG00000002409	244.3	256.094	205.904	366.847	377.89	361.111	0.584325	1.22e-05	0.00077761	Dyrk1b	chr7	+	28179469	28187294	2695	protein_coding	dual-specificity_tyrosine-(Y)-phosphorylation_regulated_kinase_1b
ENSMUSG00000031725	1445.59	2166.6	1780.27	2612.61	2832.08	3277.86	0.615338	1.26e-05	0.0008011	Ces1f	chr8	-	93256236	93279747	3285	protein_coding	carboxylesterase_1F
ENSMUSG00000052520	3250.6	4015.92	4320.6	6230.16	5678.85	5314.88	0.526037	1.27e-05	0.00080328	Cyp2j5	chr4	-	96628773	96664154	2345	protein_coding	cytochrome_P450_family_2_subfamily_j_polypeptide_5
ENSMUSG00000040128	1391.98	1269.14	1095.61	1871.65	1855.86	1705.9	0.495138	1.29e-05	0.00080596	Pnrc1	chr4	-	33245423	33290163	2095	protein_coding	proline-rich_nuclear_receptor_coactivator_1
ENSMUSG00000004035	1023.78	1193.22	1186.28	1740.7	1585.04	1511.95	0.475195	1.29e-05	0.00080596	Gstm7	chr3	-	107926334	107931817	1601	protein_coding	glutathione_S-transferase_mu_7
ENSMUSG00000029153	800.567	795.478	744.814	993.5	1177.76	1279.43	0.516659	1.31e-05	0.00081417	Ociad2	chr5	-	73322199	73341028	2722	protein_coding	OCIA_domain_containing_2
ENSMUSG00000024158	3752.38	4404.59	4187.56	5229.39	5910.83	6367.14	0.472078	1.33e-05	0.00082782	Hagh	chr17	+	24840143	24864450	1908	protein_coding	hydroxyacyl_glutathione_hydrolase
ENSMUSG00000032357	2.63633	5.6658	3.38937	27.0199	17.8448	31.0749	0.938799	1.34e-05	0.00083104	Tinag	chr9	-	76951693	77045794	1735	protein_coding	tubulointerstitial_nephritis_antigen
ENSMUSG00000001750	3251.48	3407.41	3249.56	2554.42	2403.8	2592.07	-0.376378	1.37e-05	0.00084486	Tcirg1	chr19	-	3896050	3907133	4470	protein_coding	T_cell_immune_regulator_1_ATPase_H+_transporting_lysosomal_V0_protein_A3
ENSMUSG00000074578	470.146	528.052	497.39	756.557	856.551	655.787	0.5486	1.44e-05	0.00088235	Zfos1	chr2	+	167062934	167065862	2929	protein_coding	zinc_finger_NFX1-type_containing_1_opposite_strand_RNA_1
ENSMUSG00000001739	668.75	312.752	496.542	282.67	202.591	210.023	-0.824173	1.47e-05	0.00089846	Cldn15	chr5	+	136966616	136975858	2124	protein_coding	claudin_15
ENSMUSG00000040564	36951.7	47347.9	46228.4	60922.6	61847	62405.9	0.471991	1.48e-05	0.0009003	Apoc1	chr7	-	19689481	19692660	744	protein_coding	apolipoprotein_C-I
ENSMUSG00000030536	2729.48	2266.32	2210.72	1719.92	1738.29	1559.1	-0.486506	1.5e-05	0.00090827	Iqgap1	chr7	-	80711583	80825974	16538	protein_coding	IQ_motif_containing_GTPase_activating_protein_1
ENSMUSG00000028152	218.816	143.911	144.048	84.1773	89.2241	75.0083	-0.799328	1.51e-05	0.00090827	Tspan5	chr3	+	138742195	138907905	7389	protein_coding	tetraspanin_5
ENSMUSG00000062593	1390.23	1223.81	1060.02	789.812	884.893	771.514	-0.536498	1.51e-05	0.00090827	Lilrb4a	chr10	+	51480640	51496613	1491	protein_coding	leukocyte_immunoglobulin-like_receptor_subfamily_B_member_4A
ENSMUSG00000058297	1887.61	827.206	1592.16	825.146	561.587	637.571	-0.823266	1.55e-05	0.00092713	Spock2	chr10	+	60106219	60135198	5533	protein_coding	sparc/osteonectin_cwcv_and_kazal-like_domains_proteoglycan_2
ENSMUSG00000030670	149.392	179.039	144.895	259.807	330.654	238.955	0.688863	1.58e-05	0.00094406	Cyp2r1	chr7	-	114550166	114562972	1631	protein_coding	cytochrome_P450_family_2_subfamily_r_polypeptide_1
ENSMUSG00000105703	248.694	159.775	172.01	305.533	392.586	361.111	0.717488	1.63e-05	0.00096844	Gm43305	chr14	-	54292443	54297343	4901	TEC	predicted_gene_43305
ENSMUSG00000031808	638.871	766.016	771.929	539.358	366.344	412.546	-0.632366	1.65e-05	0.00097334	Slc27a1	chr8	+	71568927	71586708	2795	protein_coding	solute_carrier_family_27_(fatty_acid_transporter)_member_1
ENSMUSG00000032294	8834.35	8079.43	7426.95	5925.67	6120.77	4980.55	-0.480488	1.67e-05	0.0009793	Pkm	chr9	+	59656368	59679375	2599	protein_coding	pyruvate_kinase_muscle
ENSMUSG00000070047	898.111	872.533	1012.57	658.869	573.133	679.361	-0.502398	1.67e-05	0.0009793	Fat1	chr8	+	44935447	45052257	15586	protein_coding	FAT_atypical_cadherin_1
ENSMUSG00000024863	1610.8	805.676	1078.67	2547.14	1723.6	2802.1	0.791411	1.69e-05	0.00098785	Mbl2	chr19	+	30232928	30239685	1101	protein_coding	mannose-binding_lectin_(protein_C)_2
ENSMUSG00000023122	76.4537	73.6554	67.7874	138.217	151.156	122.156	0.745239	1.7e-05	0.00099037	Sult1c2	chr17	-	53829637	53846339	1846	protein_coding	sulfotransferase_family_cytosolic_1C_member_2
ENSMUSG00000063193	593.175	643.634	514.337	350.219	413.58	379.328	-0.555988	1.71e-05	0.00099374	Cd300lb	chr11	-	114922781	114934386	2917	protein_coding	CD300_antigen_like_family_member_B
ENSMUSG00000038370	269.785	465.728	259.287	95.6088	137.51	193.95	-0.861798	1.86e-05	0.00107346	Pcp4l1	chr1	-	171173262	171196268	1577	protein_coding	Purkinje_cell_protein_4-like_1
ENSMUSG00000029223	73.8173	49.859	39.8251	17.6668	17.8448	16.0732	-0.935737	1.98e-05	0.00114117	Uchl1	chr5	+	66676091	66687234	1632	protein_coding	ubiquitin_carboxy-terminal_hydrolase_L1
ENSMUSG00000022884	4335.89	4379.66	4507.01	6255.1	6142.81	5357.74	0.404794	2.01e-05	0.00115274	Eif4a2	chr16	+	23107444	23114136	5338	protein_coding	eukaryotic_translation_initiation_factor_4A2
ENSMUSG00000024747	5763.03	6029.54	5731.42	8615.19	8327.23	7086.14	0.43053	2.02e-05	0.00115274	Aldh1a7	chr19	-	20692953	20727562	2066	protein_coding	aldehyde_dehydrogenase_family_1_subfamily_A7
ENSMUSG00000002996	1476.35	1566.03	1339.65	1904.9	2004.92	2124.88	0.436286	2.05e-05	0.001163	Hbp1	chr12	-	31926254	31950535	6167	protein_coding	high_mobility_group_box_transcription_factor_1
ENSMUSG00000034285	4227.8	4853.32	4960.34	6158.46	6306.57	6405.71	0.405853	2.06e-05	0.00116462	Nipsnap1	chr11	+	4873951	4894200	2649	protein_coding	4-nitrophenylphosphatase_domain_and_non-neuronal_SNAP25-like_protein_homolog_1_(C._elegans)
ENSMUSG00000020098	4711.13	5118.48	5094.22	6153.26	6743.24	6867.55	0.387483	2.06e-05	0.00116462	Pcbd1	chr10	+	61089343	61094328	809	protein_coding	pterin_4_alpha_carbinolamine_dehydratase/dimerization_cofactor_of_hepatocyte_nuclear_factor_1_alpha_(TCF1)_1
ENSMUSG00000032014	6071.48	7257.89	6599.1	9386.29	8493.08	10735.8	0.48496	2.09e-05	0.00117739	Oaf	chr9	-	43221278	43239816	2388	protein_coding	OAF_homolog_(Drosophila)
ENSMUSG00000032300	511.449	495.191	537.215	381.396	343.25	322.536	-0.515065	2.11e-05	0.00118421	1700017B05Rik	chr9	-	57252322	57262599	4934	protein_coding	RIKEN_cDNA_1700017B05_gene
ENSMUSG00000020272	1002.69	908.794	754.134	522.731	649.761	527.201	-0.580045	2.13e-05	0.00119054	Stk10	chr11	+	32533305	32624587	5187	protein_coding	serine/threonine_kinase_10
ENSMUSG00000067158	304.936	231.164	304.196	165.237	171.1	168.233	-0.640706	2.19e-05	0.0012156	Col4a4	chr1	-	82448423	82586849	10612	protein_coding	collagen_type_IV_alpha_4
ENSMUSG00000031841	57.1206	65.7232	61.856	113.276	108.119	152.16	0.786907	2.21e-05	0.00122125	Cdh13	chr8	+	118283733	119324921	11144	protein_coding	cadherin_13
ENSMUSG00000036611	445.54	568.846	455.023	673.419	810.364	761.87	0.555119	2.27e-05	0.00124973	Eepd1	chr9	+	25481547	25604110	2935	protein_coding	endonuclease/exonuclease/phosphatase_family_domain_containing_1
ENSMUSG00000030142	222.331	277.624	166.079	109.119	97.6216	130.729	-0.767658	2.37e-05	0.00130008	Clec4e	chr6	-	123281789	123289870	4965	protein_coding	C-type_lectin_domain_family_4_member_e
ENSMUSG00000031708	3419.32	3955.86	3773.21	4893.72	4835.94	5114.5	0.394167	2.38e-05	0.00130341	Tecr	chr8	-	83571700	83594491	1334	protein_coding	trans-23-enoyl-CoA_reductase
ENSMUSG00000025002	73.8173	33.9948	43.2144	131.982	110.218	117.87	0.862103	2.39e-05	0.00130622	Cyp2c55	chr19	+	39007019	39042693	1995	protein_coding	cytochrome_P450_family_2_subfamily_c_polypeptide_55
ENSMUSG00000051343	423.571	361.478	334.7	231.747	244.579	238.955	-0.57788	2.44e-05	0.00132137	Rab11fip5	chr6	-	85334962	85374634	6124	protein_coding	RAB11_family_interacting_protein_5_(class_I)
ENSMUSG00000024292	2300.64	2473.69	2739.46	4113.26	4021.38	3093.56	0.52878	2.44e-05	0.00132137	Cyp4f14	chr17	-	32905071	32917342	2405	protein_coding	cytochrome_P450_family_4_subfamily_f_polypeptide_14
ENSMUSG00000015647	1208.32	917.859	1046.47	707.713	509.102	727.581	-0.618769	2.45e-05	0.00132137	Lama5	chr2	-	180176373	180225859	11388	protein_coding	laminin_alpha_5
ENSMUSG00000032310	8806.23	10181.4	11763.7	16929	14670.5	13900.1	0.51789	2.47e-05	0.00132167	Cyp1a2	chr9	-	57676937	57683655	1892	protein_coding	cytochrome_P450_family_1_subfamily_a_polypeptide_2
ENSMUSG00000028583	639.75	284.423	507.558	265.003	219.386	184.306	-0.81691	2.48e-05	0.00132167	Pdpn	chr4	-	143267431	143299564	1817	protein_coding	podoplanin
ENSMUSG00000045314	279.451	327.483	371.983	229.669	156.405	141.444	-0.726176	2.48e-05	0.00132167	Sowahb	chr5	-	93041123	93045022	3900	protein_coding	sosondowah_ankyrin_repeat_domain_family_member_B
ENSMUSG00000064254	995.655	930.324	932.924	1571.31	1497.91	1174.42	0.521308	2.51e-05	0.00133334	Ethe1	chr7	+	24587543	24608925	1484	protein_coding	ethylmalonic_encephalopathy_1
ENSMUSG00000053559	439.389	523.52	491.458	877.107	813.514	618.283	0.592038	2.61e-05	0.00138382	Smagp	chr15	-	100621342	100636865	1142	protein_coding	small_cell_adhesion_glycoprotein
ENSMUSG00000001670	10345	11877.8	13082.1	15930.3	18077.8	28921.1	0.694615	2.66e-05	0.00140414	Tat	chr8	+	109990437	109999803	2405	protein_coding	tyrosine_aminotransferase
ENSMUSG00000040212	1000.93	788.679	763.455	591.32	564.736	528.273	-0.543982	2.67e-05	0.00140414	Emp3	chr7	-	45918023	45921426	972	protein_coding	epithelial_membrane_protein_3
ENSMUSG00000004207	51843.5	50808.6	47219.8	40398.9	37803.7	35586.1	-0.380034	2.71e-05	0.00142087	Psap	chr10	+	60277627	60302597	2744	protein_coding	prosaposin
ENSMUSG00000020473	3732.17	1809.66	3174.99	1699.14	1254.39	1590.18	-0.748923	2.72e-05	0.00142087	Aebp1	chr11	+	5861947	5872088	4058	protein_coding	AE_binding_protein_1
ENSMUSG00000057346	1885.86	2377.37	3116.52	4094.55	4039.23	3842.57	0.612074	2.74e-05	0.00142633	Apol9a	chr15	-	77403789	77411080	1573	protein_coding	apolipoprotein_L_9a
ENSMUSG00000108105	72.9386	79.3212	55.9246	15.5884	31.4908	28.9318	-0.898778	2.78e-05	0.00144226	Gm5340	chr7	-	3284595	3285474	880	processed_pseudogene	predicted_gene_5340
ENSMUSG00000070780	931.505	979.05	956.649	1180.56	1470.62	1650.18	0.532414	2.79e-05	0.00144229	Rbm47	chr5	-	66016549	66173118	7163	protein_coding	RNA_binding_motif_protein_47
ENSMUSG00000028600	1687.25	1069.7	1387.1	857.362	741.085	920.459	-0.625334	2.84e-05	0.00146464	Podn	chr4	-	108014791	108096445	4270	protein_coding	podocan
ENSMUSG00000000673	5234.88	7331.54	6885.5	9344.72	11176.1	9194.95	0.551315	2.99e-05	0.0015276	Haao	chr17	-	83831356	83846790	1222	protein_coding	3-hydroxyanthranilate_34-dioxygenase
ENSMUSG00000021250	298.784	189.238	259.287	126.786	148.007	137.158	-0.708894	3e-05	0.0015276	Fos	chr12	+	85473890	85477273	2352	protein_coding	FBJ_osteosarcoma_oncogene
ENSMUSG00000020653	170.483	194.903	163.537	302.415	259.275	280.745	0.596007	3e-05	0.0015276	Klf11	chr12	+	24651371	24662774	4228	protein_coding	Kruppel-like_factor_11
ENSMUSG00000055653	2686.42	1175.09	1815.01	1113.01	733.737	916.173	-0.789781	3.02e-05	0.00153279	Gpc3	chrX	-	52272426	52613950	2690	protein_coding	glypican_3
ENSMUSG00000037681	92.2717	55.5248	77.1081	38.4514	19.9442	23.574	-0.896257	3.12e-05	0.00157995	Esyt3	chr9	-	99309963	99358557	7138	protein_coding	extended_synaptotagmin-like_protein_3
ENSMUSG00000038768	87.8778	99.718	83.0395	194.335	180.548	132.872	0.732843	3.15e-05	0.00158822	9130409I23Rik	chr1	+	181051237	181060667	1898	protein_coding	RIKEN_cDNA_9130409I23_gene
ENSMUSG00000030107	475.419	608.507	770.234	1465.31	1011.91	921.531	0.71383	3.16e-05	0.00158822	Usp18	chr6	+	121245906	121270917	2790	protein_coding	ubiquitin_specific_peptidase_18
ENSMUSG00000025105	435.874	175.64	291.486	166.276	88.1744	110.369	-0.869374	3.22e-05	0.00161538	Bnc1	chr7	-	81966672	81992292	4646	protein_coding	basonuclin_1
ENSMUSG00000030144	526.388	628.903	432.144	342.945	327.505	226.097	-0.685369	3.27e-05	0.00163447	Clec4d	chr6	+	123262111	123275265	1599	protein_coding	C-type_lectin_domain_family_4_member_d
ENSMUSG00000056035	40392.1	42690.6	31513.5	61763.3	49235.9	64467.5	0.552915	3.36e-05	0.00167256	Cyp3a11	chr5	-	145854426	145879964	5093	protein_coding	cytochrome_P450_family_3_subfamily_a_polypeptide_11
ENSMUSG00000049103	890.202	812.475	566.872	459.338	424.077	483.268	-0.631169	3.38e-05	0.00167517	Ccr2	chr9	+	124101950	124113557	6393	protein_coding	chemokine_(C-C_motif)_receptor_2
ENSMUSG00000029776	3689.99	4397.79	4569.72	5504.78	6060.94	6010.31	0.444173	3.43e-05	0.00169479	Hibadh	chr6	-	52546228	52640389	10179	protein_coding	3-hydroxyisobutyrate_dehydrogenase
ENSMUSG00000017167	340.087	385.274	377.067	256.689	148.007	215.381	-0.68881	3.44e-05	0.00169479	Cntnap1	chr11	+	101170523	101190724	5875	protein_coding	contactin_associated_protein-like_1
ENSMUSG00000017400	106.332	140.512	117.781	65.4713	59.8326	62.1498	-0.750355	3.57e-05	0.00175444	Stac2	chr11	-	98036623	98053462	3139	protein_coding	SH3_and_cysteine_rich_domain_2
ENSMUSG00000028871	1407.8	671.963	1190.52	679.654	497.555	458.622	-0.770235	3.63e-05	0.00177844	Rspo1	chr4	+	124986430	125009099	1938	protein_coding	R-spondin_1
ENSMUSG00000040896	143.241	72.5222	88.9709	45.726	30.4412	43.9334	-0.871597	3.73e-05	0.00182215	Kcnd3	chr3	+	105452330	105674002	9587	protein_coding	potassium_voltage-gated_channel_Shal-related_family_member_3
ENSMUSG00000023039	945.565	545.05	873.61	535.202	358.996	336.466	-0.744453	3.8e-05	0.00184681	Krt7	chr15	+	101411043	101430313	7055	protein_coding	keratin_7
ENSMUSG00000023905	1326.95	890.663	1144.76	813.714	608.823	602.21	-0.630955	3.85e-05	0.00186187	Tnfrsf12a	chr17	-	23675447	23677449	963	protein_coding	tumor_necrosis_factor_receptor_superfamily_member_12a
ENSMUSG00000101514	262.755	291.222	239.798	373.082	419.878	405.045	0.539253	3.86e-05	0.00186187	Gm5524	chr1	+	27884046	27902396	2002	lincRNA	predicted_gene_5524
ENSMUSG00000030657	224.088	179.039	168.621	115.354	104.969	105.012	-0.678862	3.86e-05	0.00186187	Xylt1	chr7	+	117380979	117673580	9651	protein_coding	xylosyltransferase_1
ENSMUSG00000003423	1230.29	1227.21	1204.07	1603.53	1567.19	1593.39	0.364078	3.88e-05	0.00186561	Pih1d1	chr7	+	45154398	45160064	1222	protein_coding	PIH1_domain_containing_1
ENSMUSG00000054889	1210.08	1319	1438.79	1926.73	1675.31	1972.72	0.457328	3.92e-05	0.00187574	Dsp	chr13	+	38151328	38198577	9625	protein_coding	desmoplakin
ENSMUSG00000055730	642.387	1013.04	827.006	1306.31	1243.89	1404.8	0.592504	4e-05	0.00190364	Ces2a	chr8	+	104734003	104741634	2359	protein_coding	carboxylesterase_2A
ENSMUSG00000086841	695.113	872.533	773.623	1320.86	1226.04	997.611	0.540963	4e-05	0.00190364	2410006H16Rik	chr11	+	62602877	62604807	462	processed_transcript	RIKEN_cDNA_2410006H16_gene
ENSMUSG00000001240	266.27	275.358	260.981	432.318	398.884	364.326	0.523642	4.04e-05	0.00191383	Ramp2	chr11	+	101246028	101259546	3301	protein_coding	receptor_(calcitonin)_activity_modifying_protein_2
ENSMUSG00000055013	761.022	614.172	688.889	428.161	414.629	520.772	-0.540755	4.16e-05	0.00196191	Agap1	chr1	+	89454806	89897617	17469	protein_coding	ArfGAP_with_GTPase_domain_ankyrin_repeat_and_PH_domain_1
ENSMUSG00000020620	994.777	991.514	960.886	1451.8	1259.63	1291.21	0.417203	4.16e-05	0.00196191	Abca8b	chr11	-	109932190	109995845	7423	protein_coding	ATP-binding_cassette_sub-family_A_(ABC1)_member_8b
ENSMUSG00000027358	423.571	656.099	611.781	785.655	975.167	1218.35	0.679831	4.19e-05	0.00196627	Bmp2	chr2	+	133552159	133562885	3555	protein_coding	bone_morphogenetic_protein_2
ENSMUSG00000020101	1623.98	1522.97	1463.36	1215.89	1111.63	1057.62	-0.42028	4.2e-05	0.00196627	Vsir	chr10	+	60346851	60372684	5014	protein_coding	V-set_immunoregulatory_receptor
ENSMUSG00000030157	1791.83	2492.95	2418.31	3082.35	3330.68	3958.3	0.562259	4.25e-05	0.00198497	Clec2d	chr6	+	129180615	129186534	1213	protein_coding	C-type_lectin_domain_family_2_member_d
ENSMUSG00000083012	1405.17	895.196	1158.32	693.164	791.47	635.428	-0.613908	4.28e-05	0.00199093	Fam220a	chr5	+	143548706	143564531	4475	protein_coding	family_with_sequence_similarity_220_member_A
ENSMUSG00000031146	353.269	252.695	244.035	137.178	188.945	140.373	-0.70542	4.3e-05	0.00199448	Plp2	chrX	-	7667941	7671390	1334	protein_coding	proteolipid_protein_2
ENSMUSG00000044254	1129.23	1260.07	1007.49	1479.86	1683.71	1646.97	0.467238	4.32e-05	0.00199587	Pcsk9	chr4	-	106442329	106464329	3521	protein_coding	proprotein_convertase_subtilisin/kexin_type_9
ENSMUSG00000031093	313.724	327.483	228.782	160.041	184.746	163.947	-0.652888	4.36e-05	0.00200887	Dock11	chrX	+	35888832	36076562	9240	protein_coding	dedicator_of_cytokinesis_11
ENSMUSG00000078853	630.084	632.303	825.311	1259.54	943.676	1071.55	0.574834	4.38e-05	0.00201375	Igtp	chr11	+	58199556	58207591	2022	protein_coding	interferon_gamma_induced_GTPase
ENSMUSG00000040751	260.997	237.963	171.163	135.099	122.814	107.155	-0.70868	4.41e-05	0.00201794	Lat2	chr5	-	134600022	134615025	2621	protein_coding	linker_for_activation_of_T_cells_family_member_2
ENSMUSG00000042331	340.087	244.762	276.234	183.943	170.051	166.09	-0.627889	4.42e-05	0.00201794	Specc1	chr11	+	61956763	62223013	14840	protein_coding	sperm_antigen_with_calponin_homology_and_coiled-coil_domains_1
ENSMUSG00000017868	515.843	524.653	673.637	1219.01	938.427	756.513	0.648905	4.47e-05	0.0020348	Sgk2	chr2	+	162987330	163014127	3412	protein_coding	serum/glucocorticoid_regulated_kinase_2
ENSMUSG00000042644	637.993	469.128	634.659	371.004	372.642	383.614	-0.562101	4.51e-05	0.00204522	Itpr3	chr17	+	27057304	27122223	8990	protein_coding	inositol_145-triphosphate_receptor_3
ENSMUSG00000024965	1192.5	1190.95	1108.32	814.753	924.781	761.87	-0.44903	4.59e-05	0.00207837	Fermt3	chr19	-	6998958	7019469	2587	protein_coding	fermitin_family_member_3
ENSMUSG00000022751	2776.06	3211.37	2843.68	4017.65	4684.79	3736.49	0.46005	4.68e-05	0.00211301	Nit2	chr16	-	57156671	57167332	1280	protein_coding	nitrilase_family_member_2
ENSMUSG00000044017	1135.38	529.185	802.433	514.417	341.151	366.469	-0.770529	4.73e-05	0.00212823	Adgrd1	chr5	+	129096750	129204599	8321	protein_coding	adhesion_G_protein-coupled_receptor_D1
ENSMUSG00000025175	138.847	157.509	111.002	187.061	304.412	277.531	0.729965	4.76e-05	0.00213389	Fn3k	chr11	+	121434913	121450491	4399	protein_coding	fructosamine_3_kinase
ENSMUSG00000010797	57.1206	82.7206	78.8028	130.943	125.963	174.662	0.757946	4.79e-05	0.00213861	Wnt2	chr6	-	17988940	18030585	2255	protein_coding	wingless-type_MMTV_integration_site_family_member_2
ENSMUSG00000022895	1724.16	1424.38	1729.43	1219.01	1132.62	1146.56	-0.448741	4.8e-05	0.00213861	Ets2	chr16	+	95702075	95721051	4710	protein_coding	E26_avian_leukemia_oncogene_2_3'_domain
ENSMUSG00000067813	231.997	205.102	222.851	365.808	377.89	294.676	0.576663	4.84e-05	0.00215117	Xkr9	chr1	+	13668771	13701723	1926	protein_coding	X_Kell_blood_group_precursor_related_family_member_9_homolog
ENSMUSG00000020248	651.174	649.3	629.575	864.636	881.744	847.594	0.404141	4.86e-05	0.00215462	Nfyb	chr10	-	82748701	82764144	5068	protein_coding	nuclear_transcription_factor-Y_beta
ENSMUSG00000028970	464.873	183.572	356.731	177.708	128.063	141.444	-0.821871	4.98e-05	0.00219798	Abcb1b	chr5	+	8798147	8866315	7990	protein_coding	ATP-binding_cassette_sub-family_B_(MDR/TAP)_member_1B
ENSMUSG00000026604	691.598	373.943	639.743	322.16	280.269	330.037	-0.706092	5.15e-05	0.00226627	Ptpn14	chr1	+	189728268	189876695	13413	protein_coding	protein_tyrosine_phosphatase_non-receptor_type_14
ENSMUSG00000032599	663.477	836.272	570.261	954.01	1089.58	1370.51	0.622265	5.2e-05	0.00228509	Ip6k2	chr9	+	108783796	108806337	4067	protein_coding	inositol_hexaphosphate_kinase_2
ENSMUSG00000025372	954.353	1153.56	1269.32	629.771	647.662	860.453	-0.581121	5.25e-05	0.0022961	Baiap2	chr11	+	119942763	120006782	4992	protein_coding	brain-specific_angiogenesis_inhibitor_1-associated_protein_2
ENSMUSG00000074971	152.029	56.658	149.132	48.8436	45.1369	35.3611	-0.877676	5.31e-05	0.00231936	Fibin	chr2	-	110360917	110363183	2267	protein_coding	fin_bud_initiation_factor_homolog_(zebrafish)
ENSMUSG00000062825	6803.5	5553.61	6349.13	4886.44	4166.24	3493.24	-0.522332	5.35e-05	0.0023295	Actg1	chr11	-	120345690	120348542	2658	protein_coding	actin_gamma_cytoplasmic_1
ENSMUSG00000004038	6167.26	4184.76	4459.56	12125.7	7401.4	7137.58	0.69271	5.37e-05	0.00233005	Gstm3	chr3	-	107963696	107969283	1311	protein_coding	glutathione_S-transferase_mu_3
ENSMUSG00000027761	5000.25	5475.43	5878.86	6943.07	7189.36	7573.7	0.388137	5.53e-05	0.00239254	Aadac	chr3	+	60025717	60040160	1501	protein_coding	arylacetamide_deacetylase_(esterase)
ENSMUSG00000042305	1896.4	2063.48	1937.02	2434.91	2602.19	2732.45	0.379389	5.68e-05	0.00244543	Tmem183a	chr1	-	134346097	134361979	3564	protein_coding	transmembrane_protein_183A
ENSMUSG00000045725	168.725	87.2533	101.681	61.3144	41.9878	48.2196	-0.835701	5.69e-05	0.00244543	Prr15	chr6	+	54325835	54330201	3157	protein_coding	proline_rich_15
ENSMUSG00000068762	2208.37	2081.61	2281.89	3554.15	3100.8	2681.01	0.46855	5.76e-05	0.00246841	Gstm6	chr3	-	107938847	107943749	1989	protein_coding	glutathione_S-transferase_mu_6
ENSMUSG00000061451	733.779	329.749	610.086	335.67	217.287	250.742	-0.782557	5.86e-05	0.00250253	Tmem151a	chr19	-	5070859	5085531	4807	protein_coding	transmembrane_protein_151A
ENSMUSG00000057729	108.09	116.715	138.117	77.942	45.1369	37.5042	-0.817882	5.87e-05	0.00250253	Prtn3	chr10	+	79874476	79883174	1732	protein_coding	proteinase_3
ENSMUSG00000031822	486.843	588.11	644.827	345.023	365.294	412.546	-0.549519	5.93e-05	0.00252168	Gse1	chr8	+	120230536	120581390	8098	protein_coding	genetic_suppressor_element_1
ENSMUSG00000043740	472.782	439.666	507.558	312.807	354.797	285.032	-0.522038	6.16e-05	0.00261039	B430306N03Rik	chr17	+	48316141	48327024	6937	protein_coding	RIKEN_cDNA_B430306N03_gene
ENSMUSG00000033216	541.327	524.653	555.009	707.713	810.364	729.724	0.439947	6.29e-05	0.00266067	Eefsec	chr6	-	88257334	88446539	2801	protein_coding	eukaryotic_elongation_factor_selenocysteine-tRNA-specific
ENSMUSG00000020988	782.991	793.212	838.869	1016.36	1097.98	1182.99	0.421772	6.37e-05	0.00268511	L2hgdh	chr12	-	69690436	69724874	3338	protein_coding	L-2-hydroxyglutarate_dehydrogenase
ENSMUSG00000024827	726.749	761.483	907.503	1383.21	1090.63	1104.77	0.522707	6.44e-05	0.00270623	Gldc	chr19	-	30098449	30175418	3754	protein_coding	glycine_decarboxylase
ENSMUSG00000007837	990.383	983.582	915.977	1312.54	1257.53	1250.5	0.383363	6.53e-05	0.00272399	Prrg2	chr7	-	45053613	45061652	1295	protein_coding	proline-rich_Gla_(G-carboxyglutamic_acid)_polypeptide_2
ENSMUSG00000068246	2333.16	3281.63	3861.34	5447.62	5227.48	4570.15	0.59647	6.53e-05	0.00272399	Apol9b	chr15	+	77729121	77736381	1545	protein_coding	apolipoprotein_L_9b
ENSMUSG00000032501	1436.8	1416.45	1538.77	1174.33	968.868	1052.26	-0.430217	6.54e-05	0.00272399	Trib1	chr15	+	59648350	59656550	5699	protein_coding	tribbles_homolog_1_(Drosophila)
ENSMUSG00000036257	2106.43	2237.99	2225.97	2643.79	3050.41	3068.91	0.393852	6.57e-05	0.00273039	Pnpla8	chr12	+	44221370	44312343	3947	protein_coding	patatin-like_phospholipase_domain_containing_8
ENSMUSG00000040441	143.241	167.708	188.957	249.414	262.424	306.463	0.611584	6.66e-05	0.00276114	Slc26a10	chr10	-	127172426	127180645	2215	protein_coding	solute_carrier_family_26_member_10
ENSMUSG00000039959	942.929	905.394	858.358	681.732	679.153	636.499	-0.412807	6.69e-05	0.00276367	Hip1	chr5	-	135406531	135545120	12729	protein_coding	huntingtin_interacting_protein_1
ENSMUSG00000032066	213.543	277.624	305.89	452.063	441.922	382.542	0.592289	6.79e-05	0.00279966	Bco2	chr9	-	50533087	50555181	2118	protein_coding	beta-carotene_oxygenase_2
ENSMUSG00000100094	799.688	692.36	599.071	1136.91	1445.43	893.671	0.625429	6.83e-05	0.00280553	1810008I18Rik	chr7	+	65803111	65806449	2463	lincRNA	RIKEN_cDNA_1810008I18_gene
ENSMUSG00000035722	643.265	622.104	535.52	410.494	436.673	405.045	-0.481056	6.85e-05	0.00280802	Abca7	chr10	+	79996494	80015572	6752	protein_coding	ATP-binding_cassette_sub-family_A_(ABC1)_member_7
ENSMUSG00000061808	58199.7	77278.1	72291	87854.1	104773	115935	0.516595	6.9e-05	0.00282016	Ttr	chr18	+	20665250	20674324	1219	protein_coding	transthyretin
ENSMUSG00000034593	713.568	743.353	566.872	473.887	460.816	367.541	-0.561775	6.99e-05	0.00284999	Myo5a	chr9	+	75071015	75223688	14803	protein_coding	myosin_VA
ENSMUSG00000003032	507.934	232.298	469.428	186.022	202.591	212.166	-0.761119	7.03e-05	0.00285627	Klf4	chr4	-	55527143	55532466	3049	protein_coding	Kruppel-like_factor_4_(gut)
ENSMUSG00000073700	700.386	766.016	646.522	947.774	957.322	990.11	0.42749	7.05e-05	0.00285741	Klhl21	chr4	+	152008803	152017680	3986	protein_coding	kelch-like_21
ENSMUSG00000066637	325.148	336.548	361.815	516.495	522.748	446.835	0.491791	7.14e-05	0.00288841	Ttc32	chr12	+	9029997	9036394	1000	protein_coding	tetratricopeptide_repeat_domain_32
ENSMUSG00000064294	4401.8	5670.33	5636.52	7052.19	7180.96	8543.45	0.49058	7.23e-05	0.00291611	Aox3	chr1	+	58113130	58200698	7033	protein_coding	aldehyde_oxidase_3
ENSMUSG00000028111	766.294	930.324	653.301	496.75	555.289	474.696	-0.551422	7.45e-05	0.00299711	Ctsk	chr3	+	95499256	95509362	1512	protein_coding	cathepsin_K
ENSMUSG00000070704	8712.2	8775.19	9330.08	13088	11019.7	11455.9	0.386428	7.48e-05	0.00299823	Ugt2b36	chr5	-	87065927	87092555	2059	protein_coding	UDP_glucuronosyltransferase_2_family_polypeptide_B36
ENSMUSG00000032081	30077.1	37333.1	39625.1	48594.2	53838.9	48303.2	0.457709	7.55e-05	0.0030194	Apoc3	chr9	-	46232933	46235636	1014	protein_coding	apolipoprotein_C-III
ENSMUSG00000032484	37.7874	66.8564	111.849	24.9414	25.1927	10.7155	-0.876884	7.65e-05	0.0030526	Ngp	chr9	+	110419747	110423012	1222	protein_coding	neutrophilic_granule_protein
ENSMUSG00000027562	971.05	940.522	751.592	553.908	590.978	656.859	-0.510445	7.71e-05	0.00306548	Car2	chr3	+	14886273	14900770	2422	protein_coding	carbonic_anhydrase_2
ENSMUSG00000028931	391.935	364.877	295.722	225.512	239.33	192.879	-0.589008	7.74e-05	0.00306548	Kcnab2	chr4	-	152390742	152477871	5578	protein_coding	potassium_voltage-gated_channel_shaker-related_subfamily_beta_member_2
ENSMUSG00000075602	612.508	652.7	937.16	1930.88	1287.98	976.18	0.725136	7.75e-05	0.00306548	Ly6a	chr15	-	74994877	74998031	1205	protein_coding	lymphocyte_antigen_6_complex_locus_A
ENSMUSG00000028051	84.3627	58.9243	56.7719	88.3342	323.306	163.947	0.865255	7.99e-05	0.0031522	Hcn3	chr3	-	89146074	89160196	4154	protein_coding	hyperpolarization-activated_cyclic_nucleotide-gated_K+_3
ENSMUSG00000027890	1117.81	1207.95	1146.45	2636.52	1792.88	1443.37	0.638361	8.01e-05	0.0031527	Gstm4	chr3	-	108040408	108044894	1707	protein_coding	glutathione_S-transferase_mu_4
ENSMUSG00000029771	1532.59	1316.73	1397.27	1046.5	1069.64	828.306	-0.484158	8.36e-05	0.00328149	Irf5	chr6	+	29526625	29541871	2905	protein_coding	interferon_regulatory_factor_5
ENSMUSG00000001918	848.021	649.3	723.63	521.692	500.704	510.057	-0.490348	8.42e-05	0.00329669	Slc1a5	chr7	+	16781340	16798274	4173	protein_coding	solute_carrier_family_1_(neutral_amino_acid_transporter)_member_5
ENSMUSG00000025279	570.327	767.149	859.205	1095.34	1053.89	1349.08	0.584664	8.47e-05	0.00330935	Dnase1l3	chr14	-	7964533	7994573	5151	protein_coding	deoxyribonuclease_1-like_3
ENSMUSG00000028443	386.662	400.005	349.952	576.771	544.792	501.484	0.474172	8.56e-05	0.00333201	Nudt2	chr4	+	41465151	41480926	845	protein_coding	nudix_(nucleoside_diphosphate_linked_moiety_X)-type_motif_2
ENSMUSG00000025731	1756.68	2014.76	1824.33	2532.59	2667.27	2316.69	0.40229	8.59e-05	0.00333869	0610011F06Rik	chr17	+	25875464	25886007	1109	protein_coding	RIKEN_cDNA_0610011F06_gene
ENSMUSG00000050931	884.051	864.601	746.508	1153.54	1091.68	1169.06	0.424405	8.75e-05	0.00338882	Sgms2	chr3	-	131318985	131491411	6227	protein_coding	sphingomyelin_synthase_2
ENSMUSG00000038486	72.0598	39.6606	49.9932	17.6668	22.0436	18.2163	-0.855949	8.99e-05	0.00347523	Sv2a	chr3	+	96181151	96195521	4636	protein_coding	synaptic_vesicle_glycoprotein_2_a
ENSMUSG00000025137	9098.87	11033.6	10340.1	12675.4	14263.3	14110.1	0.40505	9.19e-05	0.00353687	Pcyt2	chr11	-	120610087	120617936	4346	protein_coding	phosphate_cytidylyltransferase_2_ethanolamine
ENSMUSG00000040562	2473.76	2463.49	2675.91	4491.54	3414.66	3223.21	0.498046	9.22e-05	0.00353687	Gstm2	chr3	-	107981702	107986453	1679	protein_coding	glutathione_S-transferase_mu_2
ENSMUSG00000030946	1103.74	1431.18	1671.81	2506.61	2200.16	1905.21	0.571499	9.22e-05	0.00353687	Lhpp	chr7	+	132610638	132706420	2085	protein_coding	phospholysine_phosphohistidine_inorganic_pyrophosphate_phosphatase
ENSMUSG00000054630	8043.45	9036.95	9386.86	14127.2	11111	11727	0.447381	9.32e-05	0.00356519	Ugt2b5	chr5	-	87124960	87140318	1858	protein_coding	UDP_glucuronosyltransferase_2_family_polypeptide_B5
ENSMUSG00000046694	81.7263	30.5953	54.2299	13.5099	15.7454	21.4309	-0.864472	9.62e-05	0.00366477	Fam46b	chr4	+	133480132	133487938	2287	protein_coding	family_with_sequence_similarity_46_member_B
ENSMUSG00000032757	1000.93	979.05	815.143	1248.11	1704.7	1283.71	0.535863	9.63e-05	0.00366477	Bet1	chr6	-	4076899	4086972	3730	protein_coding	Bet1_golgi_vesicular_membrane_trafficking_protein
ENSMUSG00000021375	650.296	557.514	722.783	425.044	390.486	478.982	-0.520335	9.68e-05	0.00367407	Kif13a	chr13	-	46749087	46929718	6866	protein_coding	kinesin_family_member_13A
ENSMUSG00000017969	1493.04	958.653	1126.12	767.988	732.687	794.017	-0.563924	9.83e-05	0.00371635	Ptgis	chr2	-	167191805	167240604	2567	protein_coding	prostaglandin_I2_(prostacyclin)_synthase
ENSMUSG00000025950	6970.47	7933.25	7295.62	8962.29	10444.5	10046.8	0.386494	9.84e-05	0.00371635	Idh1	chr1	-	65158616	65186500	2771	protein_coding	isocitrate_dehydrogenase_1_(NADP+)_soluble
ENSMUSG00000025780	611.629	761.483	767.692	547.672	432.474	425.404	-0.539662	9.88e-05	0.00371635	Itih5	chr2	+	10153571	10256529	7900	protein_coding	inter-alpha_(globulin)_inhibitor_H5
ENSMUSG00000059743	84.3627	95.1854	55.9246	120.55	222.535	159.661	0.781655	9.89e-05	0.00371635	Fdps	chr3	-	89093588	89101959	4208	protein_coding	farnesyl_diphosphate_synthetase
ENSMUSG00000059195	144.998	128.047	129.643	85.2166	75.578	61.0782	-0.688086	0.00010236	0.0038358	Gm12715	chr4	+	103563402	103564529	1128	processed_pseudogene	predicted_gene_12715
ENSMUSG00000022707	3214.57	3064.06	2683.53	4095.59	4043.42	3796.49	0.390967	0.0001044	0.00390227	Gbe1	chr16	+	70313949	70569716	5352	protein_coding	glucan_(14-alpha-)_branching_enzyme_1
ENSMUSG00000025324	151.15	97.4517	132.185	76.9027	55.6338	58.9351	-0.745274	0.00010555	0.00393545	Atp10a	chr7	+	58656166	58829420	5587	protein_coding	ATPase_class_V_type_10A
ENSMUSG00000064210	1038.72	937.123	939.702	710.831	686.5	758.656	-0.409596	0.00010636	0.00395549	Ano6	chr15	+	95790843	95975464	5640	protein_coding	anoctamin_6
ENSMUSG00000056708	1569.5	1347.33	1387.1	1046.5	1054.94	743.654	-0.532878	0.00010693	0.00396679	Ier5	chr1	-	155096361	155099636	3276	protein_coding	immediate_early_response_5
ENSMUSG00000029385	303.178	324.084	210.988	426.083	450.319	471.481	0.59316	0.00010785	0.00399105	Ccng2	chr5	+	93267257	93276231	5458	protein_coding	cyclin_G2
ENSMUSG00000086437	27.2421	23.7963	22.8782	53.0005	62.9817	57.8636	0.811011	0.00011028	0.00407064	Gm13021	chr4	+	140424644	140431931	280	lincRNA	predicted_gene_13021
ENSMUSG00000026600	965.777	847.603	810.059	644.32	622.469	637.571	-0.431066	0.00011088	0.00408275	Soat1	chr1	-	156424525	156474331	9791	protein_coding	sterol_O-acyltransferase_1
ENSMUSG00000063889	463.995	356.945	444.855	669.262	624.568	575.421	0.50567	0.0001116	0.00409897	Crem	chr18	-	3266048	3337748	5895	protein_coding	cAMP_responsive_element_modulator
ENSMUSG00000090610	10.5453	20.3969	13.5575	44.6867	45.1369	38.5757	0.850417	0.00011246	0.00411033	Gm3571	chr10	+	93778611	93779772	1161	pseudogene	predicted_gene_3571
ENSMUSG00000032352	290.875	141.645	160.148	103.923	85.0253	91.0815	-0.773397	0.00011246	0.00411033	Lrrc1	chr9	-	77430823	77544870	8247	protein_coding	leucine_rich_repeat_containing_1
ENSMUSG00000005320	806.718	820.407	899.877	1126.52	1187.2	1074.76	0.398378	0.0001145	0.0041747	Fgfr4	chr13	+	55152640	55168759	3542	protein_coding	fibroblast_growth_factor_receptor_4
ENSMUSG00000041607	501.782	303.687	387.235	270.199	214.138	198.236	-0.660035	0.00011495	0.0041809	Mbp	chr18	+	82475146	82585637	8403	protein_coding	myelin_basic_protein
ENSMUSG00000042428	287.36	171.107	166.079	127.825	95.5222	84.6523	-0.75212	0.00011548	0.0041896	Mgat3	chr15	+	80173721	80215519	4665	protein_coding	mannoside_acetylglucosaminyltransferase_3
ENSMUSG00000038279	869.111	734.287	1101.54	584.045	556.338	620.426	-0.548585	0.00011585	0.00419284	Nop2	chr6	+	125131909	125144753	2772	protein_coding	NOP2_nucleolar_protein
ENSMUSG00000055737	4929.94	6034.07	6191.53	7478.27	9215.27	7661.56	0.464845	0.00011841	0.0042686	Ghr	chr15	-	3317760	3583492	9053	protein_coding	growth_hormone_receptor
ENSMUSG00000052974	4148.71	4347.93	5653.47	6531.54	7004.61	6657.52	0.470416	0.00011852	0.0042686	Cyp2f2	chr7	+	27119909	27133660	2025	protein_coding	cytochrome_P450_family_2_subfamily_f_polypeptide_2
ENSMUSG00000029632	7475.76	8282.26	7737.08	9648.18	10270.2	9900.03	0.330561	0.00011957	0.00429308	Ndufa4	chr6	-	11900292	11907497	1381	protein_coding	NADH_dehydrogenase_(ubiquinone)_1_alpha_subcomplex_4
ENSMUSG00000000120	199.483	247.029	188.957	438.554	341.151	288.246	0.629974	0.00011977	0.00429308	Ngfr	chr11	-	95568818	95587735	3446	protein_coding	nerve_growth_factor_receptor_(TNFR_superfamily_member_16)
ENSMUSG00000064337	4985.31	5540.02	5087.44	6145.98	7690.06	8807.05	0.488137	0.00012016	0.00429648	mt-Rnr1	chrMT	+	70	1024	955	Mt_rRNA	mitochondrially_encoded_12S_rRNA
ENSMUSG00000001119	3337.6	2421.56	2568.29	2094.04	1825.42	1655.54	-0.519242	0.0001208	0.00430899	Col6a1	chr10	-	76708792	76726168	4380	protein_coding	collagen_type_VI_alpha_1
ENSMUSG00000031673	286.482	141.645	160.148	116.393	73.4786	75.0083	-0.789951	0.0001224	0.00435571	Cdh11	chr8	-	102632995	102785111	4216	protein_coding	cadherin_11
ENSMUSG00000037526	272.421	277.624	255.05	351.258	406.232	420.047	0.497286	0.00013076	0.00463552	Atg14	chr14	-	47540894	47568434	3450	protein_coding	autophagy_related_14
ENSMUSG00000036570	4170.68	4478.25	4840.02	5933.98	6020	5583.83	0.360679	0.00013089	0.00463552	Fxyd1	chr7	-	31051678	31057199	2186	protein_coding	FXYD_domain-containing_ion_transport_regulator_1
ENSMUSG00000019689	681.053	743.353	670.248	912.441	914.284	975.108	0.396497	0.0001317	0.0046532	1110001J03Rik	chr6	+	38533502	38539449	689	protein_coding	RIKEN_cDNA_1110001J03_gene
ENSMUSG00000026304	612.508	593.775	570.261	941.539	754.731	800.446	0.453128	0.00013245	0.00466859	Rab17	chr1	-	90958133	90969661	1992	protein_coding	RAB17_member_RAS_oncogene_family
ENSMUSG00000036368	672.265	732.021	621.949	878.146	1062.29	909.744	0.455004	0.00013294	0.0046745	Rmdn2	chr17	+	79614900	79682152	1802	protein_coding	regulator_of_microtubule_dynamics_2
ENSMUSG00000064080	1140.65	518.987	931.229	349.18	376.84	568.992	-0.741677	0.00013494	0.00473166	Fbln2	chr6	+	91212455	91272540	6370	protein_coding	fibulin_2
ENSMUSG00000105096	87.8778	86.1201	116.933	234.865	204.691	130.729	0.729104	0.0001352	0.00473166	Gbp10	chr5	-	105215699	105239533	3873	protein_coding	guanylate-binding_protein_10
ENSMUSG00000043822	495.631	276.491	425.366	212.002	244.579	229.311	-0.657323	0.00013642	0.00476302	Adamtsl5	chr10	-	80339110	80348412	4722	protein_coding	ADAMTS-like_5
ENSMUSG00000028743	3348.14	3875.4	3557.14	4550.77	4702.63	4651.59	0.350934	0.0001395	0.00485916	Akr7a5	chr4	+	139310744	139318426	1793	protein_coding	aldo-keto_reductase_family_7_member_A5_(aflatoxin_aldehyde_reductase)
ENSMUSG00000057110	639.75	783.013	765.15	540.398	436.673	522.915	-0.49265	0.00014142	0.00491452	Cntrl	chr2	+	35109492	35178822	10194	protein_coding	centriolin
ENSMUSG00000002083	398.086	417.003	344.868	696.282	639.264	475.767	0.56233	0.00014358	0.00497794	Bbc3	chr7	+	16309616	16318205	2008	protein_coding	BCL2_binding_component_3
ENSMUSG00000003051	109.847	107.65	136.422	78.9812	47.2363	39.6473	-0.768767	0.00014413	0.00498558	Elf3	chr1	-	135253575	135258568	2217	protein_coding	E74-like_factor_3
ENSMUSG00000028236	32.5148	24.9295	16.9468	2.07845	7.34786	4.28619	-0.812654	0.00014456	0.00498856	Sdr16c5	chr4	-	3995936	4019663	1568	protein_coding	short_chain_dehydrogenase/reductase_family_16C_member_5
ENSMUSG00000037411	486.843	316.151	398.251	275.395	234.082	225.025	-0.604	0.0001463	0.00503712	Serpine1	chr5	-	137061504	137072268	3876	protein_coding	serine_(or_cysteine)_peptidase_inhibitor_clade_E_member_1
ENSMUSG00000045136	117.756	46.4595	68.6347	33.2552	27.2921	24.6456	-0.831357	0.00014738	0.00505656	Tubb2b	chr13	-	34127008	34130354	1922	protein_coding	tubulin_beta_2B_class_IIB
ENSMUSG00000024580	833.081	777.347	729.562	1053.78	1008.76	1369.44	0.498698	0.00014755	0.00505656	Grpel2	chr18	-	61712440	61726331	4030	protein_coding	GrpE-like_2_mitochondrial
ENSMUSG00000060803	26474.9	25829.2	25974.4	33106.6	32598.3	31019.2	0.295526	0.00014805	0.00505687	Gstp1	chr19	-	4035407	4037921	757	protein_coding	glutathione_S-transferase_pi_1
ENSMUSG00000042759	349.754	367.144	329.616	230.708	257.175	227.168	-0.495347	0.00014824	0.00505687	Apobr	chr7	+	126584942	126589112	3779	protein_coding	apolipoprotein_B_receptor
ENSMUSG00000030562	623.932	639.102	687.194	870.872	886.992	843.308	0.391234	0.00014867	0.00505983	Nox4	chr7	+	87246096	87398710	8471	protein_coding	NADPH_oxidase_4
ENSMUSG00000025270	6054.78	3826.68	4258.74	2664.58	3414.66	2847.1	-0.574293	0.00015017	0.00509921	Alas2	chrX	+	150547375	150570638	2403	protein_coding	aminolevulinic_acid_synthase_2_erythroid
ENSMUSG00000023044	1586.19	2111.08	1452.34	2943.09	4297.45	6613.59	0.828411	0.00015102	0.005103	Csad	chr15	-	102176998	102189043	2265	protein_coding	cysteine_sulfinic_acid_decarboxylase
ENSMUSG00000026728	9522.44	6937.2	7715.9	5857.08	5852.05	5415.6	-0.457504	0.00015105	0.005103	Vim	chr2	+	13573927	13582826	4743	protein_coding	vimentin
ENSMUSG00000087006	180.149	157.509	130.491	338.788	291.815	204.666	0.670072	0.00015131	0.005103	Gm13889	chr2	-	93955810	93957201	1392	protein_coding	predicted_gene_13889
ENSMUSG00000032633	885.808	925.791	837.174	1072.48	1297.42	1255.85	0.42274	0.00015302	0.00514898	Flcn	chr11	-	59791408	59810016	4322	protein_coding	folliculin
ENSMUSG00000022415	385.783	500.856	352.494	292.023	245.629	238.955	-0.578265	0.00015337	0.00514903	Syngr1	chr15	+	80091334	80119501	4808	protein_coding	synaptogyrin_1
ENSMUSG00000027589	692.477	675.363	662.622	934.264	865.998	885.098	0.38134	0.00015393	0.00515629	Pcmtd2	chr2	+	181837854	181857461	4183	protein_coding	protein-L-isoaspartate_(D-aspartate)_O-methyltransferase_domain_containing_2
ENSMUSG00000028820	3434.26	3384.75	3844.39	2615.73	2763.85	2828.89	-0.359567	0.00015442	0.00516078	Sfpq	chr4	+	127021324	127037013	4743	protein_coding	splicing_factor_proline/glutamine_rich_(polypyrimidine_tract_binding_protein_associated)
ENSMUSG00000002808	295.269	218.7	244.882	146.531	150.106	173.591	-0.592167	0.00015562	0.00518934	Epdr1	chr13	-	19591709	19619830	2386	protein_coding	ependymin_related_protein_1_(zebrafish)
ENSMUSG00000030800	422.692	429.467	320.295	798.126	731.637	473.624	0.638064	0.00015678	0.00521634	Prss8	chr7	-	127925716	127930104	1852	protein_coding	protease_serine_8_(prostasin)
ENSMUSG00000030168	4917.64	5496.96	6274.57	8021.79	7777.19	7041.14	0.421849	0.00015722	0.00521933	Adipor2	chr6	-	119353150	119417704	5979	protein_coding	adiponectin_receptor_2
ENSMUSG00000027015	309.33	139.379	269.455	136.139	80.8265	115.727	-0.771628	0.0001587	0.00525647	Cybrd1	chr2	+	71117923	71142926	5339	protein_coding	cytochrome_b_reductase_1
ENSMUSG00000038286	1859.49	2227.79	2270.03	2817.34	2998.98	2751.73	0.404034	0.00016119	0.00532704	Bphl	chr13	+	34037641	34074074	1209	protein_coding	biphenyl_hydrolase-like_(serine_hydrolase_breast_epithelial_mucin-associated_antigen)
ENSMUSG00000039989	420.056	428.334	477.054	334.631	294.964	293.604	-0.475833	0.0001656	0.0054607	Cbx4	chr11	-	119077573	119086221	5210	protein_coding	chromobox_4
ENSMUSG00000027540	1910.46	2000.03	1837.04	1414.39	1519.96	1519.45	-0.350492	0.00016779	0.00550906	Ptpn1	chr2	+	167932057	167979385	5533	protein_coding	protein_tyrosine_phosphatase_non-receptor_type_1
ENSMUSG00000054226	1773.37	2241.39	2054.8	2792.4	2688.27	2705.66	0.405104	0.00016801	0.00550906	Tprkb	chr6	+	85911865	85930284	5355	protein_coding	Tp53rk_binding_protein
ENSMUSG00000019791	413.026	555.248	548.23	771.106	712.743	732.938	0.495403	0.00016844	0.00550906	Hint3	chr10	-	30608141	30618479	990	protein_coding	histidine_triad_nucleotide_binding_protein_3
ENSMUSG00000002980	5082.85	2563.21	3796.09	2497.26	1901	2215.96	-0.645782	0.00016855	0.00550906	Bcam	chr7	-	19756131	19771016	3199	protein_coding	basal_cell_adhesion_molecule
ENSMUSG00000029816	16574.6	21243.3	17645.9	14126.2	13502.2	10658.7	-0.484787	0.0001695	0.00552796	Gpnmb	chr6	+	49036546	49070929	6514	protein_coding	glycoprotein_(transmembrane)_nmb
ENSMUSG00000034957	16470.1	16679	17118.9	20203.6	23008.3	20711.9	0.332327	0.00017112	0.00555749	Cebpa	chr7	+	35119293	35121928	2636	protein_coding	CCAAT/enhancer_binding_protein_(C/EBP)_alpha
ENSMUSG00000045667	437.631	260.627	317.753	223.434	150.106	192.879	-0.67205	0.0001715	0.00555749	Smtnl2	chr11	-	72389164	72411713	3815	protein_coding	smoothelin-like_2
ENSMUSG00000052397	4269.98	2236.86	3361.41	2322.67	1699.46	1596.61	-0.656528	0.00017173	0.00555749	Ezr	chr17	-	6738041	6782784	3290	protein_coding	ezrin
ENSMUSG00000002769	15884.8	22614.5	24208.6	26697.7	35018.9	37177.3	0.568734	0.0001719	0.00555749	Gnmt	chr17	-	46725664	46729168	1206	protein_coding	glycine_N-methyltransferase
ENSMUSG00000030236	10408.2	12888.6	12013.6	17451.7	14900.4	15563.2	0.411706	0.00017239	0.00556092	Slco1b2	chr6	+	141629518	141686646	4929	protein_coding	solute_carrier_organic_anion_transporter_family_member_1b2
ENSMUSG00000020340	415.662	338.815	327.074	213.041	247.728	248.599	-0.537521	0.00017315	0.00557355	Cyfip2	chr11	-	46193850	46312859	7103	protein_coding	cytoplasmic_FMR1_interacting_protein_2
ENSMUSG00000025764	556.266	589.243	627.033	850.087	750.532	811.161	0.41454	0.00017634	0.005664	Jade1	chr3	+	41555731	41616864	8492	protein_coding	jade_family_PHD_finger_1
ENSMUSG00000001604	1460.53	1474.24	1429.47	1734.47	2076.3	1969.5	0.382725	0.00017868	0.00572662	Tcea3	chr4	+	136247729	136274898	1400	protein_coding	transcription_elongation_factor_A_(SII)_3
ENSMUSG00000032959	5970.42	6570.06	5842.42	7562.45	8045.91	7791.22	0.333688	0.00017981	0.00574555	Pebp1	chr5	-	117282654	117287625	1768	protein_coding	phosphatidylethanolamine_binding_protein_1
ENSMUSG00000038119	544.842	256.094	543.994	252.532	154.305	245.384	-0.748679	0.00018004	0.00574555	Cdon	chr9	+	35421128	35507652	7715	protein_coding	cell_adhesion_molecule-related/down-regulated_by_oncogenes
ENSMUSG00000035472	185.422	228.898	199.125	297.219	355.847	288.246	0.544938	0.00018081	0.00575744	Slc25a21	chr12	-	56712634	57197472	4803	protein_coding	solute_carrier_family_25_(mitochondrial_oxodicarboxylate_carrier)_member_21
ENSMUSG00000021286	958.747	916.726	818.532	1125.48	1384.55	1227.99	0.437386	0.0001812	0.00575769	Zfyve21	chr12	+	111814170	111828388	1310	protein_coding	zinc_finger_FYVE_domain_containing_21
ENSMUSG00000034785	2984.33	3839.14	3945.22	2892.17	2066.85	2078.8	-0.539397	0.00018926	0.00600085	Dio1	chr4	-	107291465	107307169	1970	protein_coding	deiodinase_iodothyronine_type_I
ENSMUSG00000024925	1249.62	1328.06	1186.28	1659.64	1645.92	1571.96	0.356497	0.00019101	0.00604343	Rnaseh2c	chr19	+	5601873	5603439	1455	protein_coding	ribonuclease_H2_subunit_C
ENSMUSG00000022231	396.329	276.491	368.594	253.571	103.92	148.945	-0.745148	0.00019194	0.00606013	Sema5a	chr15	+	32244813	32696341	10809	protein_coding	sema_domain_seven_thrombospondin_repeats_(type_1_and_type_1-like)_transmembrane_domain_(TM)_and_short_cytoplasmic_domain_(semaphorin)_5A
ENSMUSG00000056737	3050.24	3100.32	2551.35	1991.16	2300.93	1585.89	-0.506332	0.00019545	0.0061578	Capg	chr6	+	72544391	72562983	2529	protein_coding	capping_protein_(actin_filament)_gelsolin-like
ENSMUSG00000020806	733.779	745.619	788.028	604.83	541.643	518.629	-0.415314	0.00019646	0.00617636	Rhbdf2	chr11	-	116598165	116627019	5293	protein_coding	rhomboid_5_homolog_2_(Drosophila)
ENSMUSG00000061048	405.995	222.099	293.18	205.767	151.156	123.228	-0.710312	0.00019731	0.00619006	Cdh3	chr8	+	106510913	106556908	3973	protein_coding	cadherin_3
ENSMUSG00000032452	111.605	49.859	71.1767	36.3729	29.3915	26.7887	-0.80484	0.00020121	0.00629893	Clstn2	chr9	-	97444395	98033181	5691	protein_coding	calsyntenin_2
ENSMUSG00000029575	444.662	552.982	503.321	712.909	733.737	655.787	0.448814	0.00020284	0.0063367	Mmab	chr5	-	114431034	114444060	3670	protein_coding	methylmalonic_aciduria_(cobalamin_deficiency)_type_B_homolog_(human)
ENSMUSG00000005442	1498.32	1417.58	1376.93	1024.68	1097.98	1154.06	-0.369147	0.00020415	0.00636428	Cic	chr7	+	25267704	25294159	10294	protein_coding	capicua_transcriptional_repressor
ENSMUSG00000008540	40702.4	47287.9	44151.6	60584.8	57507.5	53461.6	0.357881	0.00020509	0.00638012	Mgst1	chr6	+	138140316	138156755	2013	protein_coding	microsomal_glutathione_S-transferase_1
ENSMUSG00000034175	290.875	356.945	300.806	495.711	499.655	407.188	0.507042	0.00020596	0.00639394	Rhbdd3	chr11	+	5098926	5106093	2790	protein_coding	rhomboid_domain_containing_3
ENSMUSG00000000326	11585.8	14329.9	13577	20992.4	18438.9	16046.4	0.450359	0.00020814	0.00644784	Comt	chr16	-	18406886	18426852	2532	protein_coding	catechol-O-methyltransferase
ENSMUSG00000042677	397.208	403.405	310.975	220.316	258.225	249.671	-0.535054	0.00020935	0.00646722	Zc3h12a	chr4	-	125118423	125127840	2882	protein_coding	zinc_finger_CCCH_type_containing_12A
ENSMUSG00000024427	175.756	197.17	221.156	139.256	115.466	99.6539	-0.617939	0.00020963	0.00646722	Spry4	chr18	-	38586268	38601268	4587	protein_coding	sprouty_homolog_4_(Drosophila)
ENSMUSG00000096210	4107.41	4383.06	3713.9	5032.97	5567.58	5335.23	0.365119	0.00021257	0.0065344	H1f0	chr15	+	79028212	79030498	2287	protein_coding	H1_histone_family_member_0
ENSMUSG00000006378	1326.08	1657.81	1526.06	1926.73	2074.2	2088.45	0.405638	0.00021297	0.0065344	Gcat	chr15	+	79030874	79043558	3851	protein_coding	glycine_C-acetyltransferase_(2-amino-3-ketobutyrate-coenzyme_A_ligase)
ENSMUSG00000027244	926.232	933.723	783.791	1124.44	1503.16	1204.42	0.484515	0.00021313	0.0065344	Atg13	chr2	-	91674618	91710576	4368	protein_coding	autophagy_related_13
ENSMUSG00000001323	480.691	537.118	540.604	670.301	779.923	697.577	0.429082	0.00021773	0.0066615	Srr	chr11	-	74906359	74925948	4560	protein_coding	serine_racemase
ENSMUSG00000003452	119.514	37.3943	109.307	39.4906	22.0436	27.8602	-0.818241	0.0002198	0.00671116	Bicd1	chr6	+	149408886	149563329	27373	protein_coding	bicaudal_D_homolog_1_(Drosophila)
ENSMUSG00000020390	2312.06	2235.72	2199.7	2812.15	2882.46	2754.95	0.312218	0.00022598	0.00688558	Ube2b	chr11	-	51985497	52000762	2126	protein_coding	ubiquitin-conjugating_enzyme_E2B
ENSMUSG00000053175	1219.74	1239.68	1693.84	978.951	924.781	941.89	-0.491351	0.00022808	0.00693547	Bcl3	chr7	-	19808462	19822770	2475	protein_coding	B_cell_leukemia/lymphoma_3
ENSMUSG00000063590	10.5453	24.9295	18.6415	62.3536	79.7768	30.0033	0.816678	0.00023038	0.00699092	Slc22a28	chr19	-	8062209	8131982	2004	protein_coding	solute_carrier_family_22_member_28
ENSMUSG00000007872	3443.05	2855.56	2964.85	2477.52	2227.45	2219.17	-0.394085	0.00023141	0.00700801	Id3	chr4	+	136143497	136145755	1791	protein_coding	inhibitor_of_DNA_binding_3
ENSMUSG00000041044	14.9392	20.3969	24.5729	57.1574	32.5405	92.1531	0.815066	0.00023481	0.00709658	Lrit1	chr14	+	37054830	37064946	4325	protein_coding	leucine-rich_repeat_immunoglobulin-like_and_transmembrane_domains_1
ENSMUSG00000022890	3892.99	4029.51	4063.01	4719.13	5182.34	5232.37	0.322748	0.00023653	0.00713394	Atp5j	chr16	-	84827866	84835625	3130	protein_coding	ATP_synthase_H+_transporting_mitochondrial_F0_complex_subunit_F
ENSMUSG00000021213	1768.98	2170	1944.65	2614.69	2644.18	2520.28	0.380328	0.00023914	0.00719032	Akr1c13	chr13	+	4191184	4205596	1400	protein_coding	aldo-keto_reductase_family_1_member_C13
ENSMUSG00000058613	90.5141	100.851	116.086	67.5497	39.8884	45.005	-0.729258	0.00023937	0.00719032	Cyp2d41-ps	chr15	-	82777931	82782110	1503	unprocessed_pseudogene	cytochrome_P450_family_2_subfamily_d_member_41_pseudogene
ENSMUSG00000025161	379.632	359.211	241.492	193.296	217.287	170.376	-0.620126	0.00024078	0.00721793	Slc16a3	chr11	+	120948480	120960868	5318	protein_coding	solute_carrier_family_16_(monocarboxylic_acid_transporters)_member_3
ENSMUSG00000031150	273.3	247.029	377.067	202.649	145.908	178.948	-0.628388	0.00024636	0.00737058	Ccdc120	chrX	-	7731714	7750905	4165	protein_coding	coiled-coil_domain_containing_120
ENSMUSG00000035107	253.967	143.911	227.088	110.158	119.665	117.87	-0.66768	0.00024758	0.0073921	Dcbld2	chr16	+	58408443	58469727	8401	protein_coding	discoidin_CUB_and_LCCL_domain_containing_2
ENSMUSG00000024998	809.354	707.091	801.586	480.123	480.76	632.213	-0.487913	0.00024835	0.00740004	Plce1	chr19	+	38481109	38785030	15998	protein_coding	phospholipase_C_epsilon_1
ENSMUSG00000008384	533.418	410.204	451.633	312.807	344.3	281.817	-0.509586	0.00024932	0.00741424	Sertad1	chr7	+	27486910	27490316	1344	protein_coding	SERTA_domain_containing_1
ENSMUSG00000027827	333.057	157.509	183.873	129.903	106.019	58.9351	-0.774194	0.00025165	0.00746834	Kcnab1	chr3	+	65109384	65378223	8593	protein_coding	potassium_voltage-gated_channel_shaker-related_subfamily_beta_member_1
ENSMUSG00000035403	412.147	203.969	295.722	194.335	134.361	150.017	-0.700539	0.00025391	0.00752041	Crb2	chr2	+	37776249	37799103	6698	protein_coding	crumbs_family_member_2
ENSMUSG00000070576	413.026	430.601	512.642	325.278	250.877	322.536	-0.524132	0.00025742	0.00760934	Mn1	chr5	+	111417362	111457033	6940	protein_coding	meningioma_1
ENSMUSG00000040859	1238.2	1238.54	1294.74	1667.96	1633.33	1530.17	0.340593	0.00025794	0.00760934	Bsdc1	chr4	+	129461581	129488498	5630	protein_coding	BSD_domain_containing_1
ENSMUSG00000031889	803.203	705.958	723.63	919.715	1022.4	1158.34	0.43572	0.00025964	0.00764455	D230025D16Rik	chr8	+	105225145	105253053	4704	protein_coding	RIKEN_cDNA_D230025D16_gene
ENSMUSG00000028465	4795.49	4592.69	4457.02	3561.43	3649.79	3832.93	-0.313416	0.00026176	0.00769174	Tln1	chr4	-	43531519	43562691	9801	protein_coding	talin_1
ENSMUSG00000044162	107.211	71.389	51.6879	29.0983	36.7393	30.0033	-0.782997	0.00026751	0.00784492	Tnip3	chr6	+	65590398	65634040	10647	protein_coding	TNFAIP3_interacting_protein_3
ENSMUSG00000026348	192.452	197.17	249.119	385.553	413.58	265.744	0.609289	0.00027129	0.00794033	Acmsd	chr1	+	127729413	127767978	2831	protein_coding	amino_carboxymuconate_semialdehyde_decarboxylase
ENSMUSG00000026272	2633.7	3696.37	3913.87	5411.25	4726.78	4924.83	0.497252	0.00027389	0.00800046	Agxt	chr1	+	93135240	93145421	1697	protein_coding	alanine-glyoxylate_aminotransferase
ENSMUSG00000057069	697.75	721.822	603.308	954.01	1263.83	847.594	0.527423	0.00027446	0.00800136	Ero1lb	chr13	+	12565883	12609526	4237	protein_coding	ERO1-like_beta_(S._cerevisiae)
ENSMUSG00000045679	282.088	230.031	233.866	172.512	162.703	147.874	-0.545276	0.00027757	0.00807475	Pqlc3	chr12	-	16988648	17000408	5408	protein_coding	PQ_loop_repeat_containing
ENSMUSG00000028518	797.052	858.935	786.333	1155.62	1047.6	1024.4	0.379529	0.00027806	0.00807475	Prkaa2	chr4	-	105029874	105109890	7969	protein_coding	protein_kinase_AMP-activated_alpha_2_catalytic_subunit
ENSMUSG00000025197	3919.35	4214.22	4718.85	5265.76	5685.15	6512.87	0.411248	0.00027953	0.00808969	Cyp2c44	chr19	-	44005022	44029247	1964	protein_coding	cytochrome_P450_family_2_subfamily_c_polypeptide_44
ENSMUSG00000040703	1333.98	664.031	1034.6	686.929	520.649	511.128	-0.651361	0.00027967	0.00808969	Cyp2s1	chr7	-	25802475	25816913	4938	protein_coding	cytochrome_P450_family_2_subfamily_s_polypeptide_1
ENSMUSG00000017831	928.868	925.791	822.769	1148.35	1300.57	1135.84	0.394582	0.0002865	0.00827104	Rab5a	chr17	+	53479234	53507671	2357	protein_coding	RAB5A_member_RAS_oncogene_family
ENSMUSG00000038704	1138.9	1505.97	1387.95	1885.16	1918.84	1761.62	0.429614	0.00028854	0.0083138	Aspdh	chr7	+	44465391	44467758	1470	protein_coding	aspartate_dehydrogenase_domain_containing
ENSMUSG00000047492	1985.16	1818.72	2411.54	1684.59	1070.69	857.238	-0.632124	0.00030004	0.0086124	Inhbe	chr10	-	127349402	127351772	2135	protein_coding	inhibin_beta-E
ENSMUSG00000019917	401.601	361.478	349.952	514.417	525.897	493.983	0.427094	0.00030006	0.0086124	2019-09-10	chr10	-	59164113	59221847	2539	protein_coding	septin_10
ENSMUSG00000025940	962.262	1037.97	1051.55	1309.43	1377.2	1266.57	0.35438	0.0003019	0.00864106	Tmem70	chr1	+	16665207	16678275	1820	protein_coding	transmembrane_protein_70
ENSMUSG00000036596	492.116	356.945	319.448	247.336	240.38	246.456	-0.570963	0.00030271	0.00864106	Cpz	chr5	-	35502218	35525698	2245	protein_coding	carboxypeptidase_Z
ENSMUSG00000029627	87.8778	82.7206	92.3603	145.492	132.262	158.589	0.603094	0.00030281	0.00864106	Zkscan14	chr5	-	145194946	145201868	3621	protein_coding	zinc_finger_with_KRAB_and_SCAN_domains_14
ENSMUSG00000085139	90.5141	15.8642	81.3448	19.7453	14.6957	10.7155	-0.783767	0.0003071	0.0087468	A730046J19Rik	chrX	+	144153695	144166274	4707	lincRNA	RIKEN_cDNA_A730046J19_gene
ENSMUSG00000036078	2573.06	2886.16	2774.2	3877.35	3668.68	3257.5	0.370016	0.00030796	0.00875005	Sigmar1	chr4	-	41738493	41756157	3136	protein_coding	sigma_non-opioid_intracellular_receptor_1
ENSMUSG00000038600	326.905	131.446	268.607	144.452	104.969	81.4376	-0.755185	0.0003084	0.00875005	Atp6v0a4	chr6	-	38048483	38124586	4973	protein_coding	ATPase_H+_transporting_lysosomal_V0_subunit_A4
ENSMUSG00000033416	2291.85	2463.49	2248	2971.15	3027.32	2843.89	0.322596	0.00030917	0.00875534	Gucd1	chr10	-	75351111	75517972	8206	protein_coding	guanylyl_cyclase_domain_containing_1
ENSMUSG00000020321	7354.49	8821.65	8586.96	10400.6	11099.5	10646.9	0.356781	0.00031525	0.00891038	Mdh1	chr11	-	21556787	21572367	2567	protein_coding	malate_dehydrogenase_1_NAD_(soluble)
ENSMUSG00000040557	367.329	404.538	355.036	551.829	480.76	529.344	0.434728	0.00032783	0.00924845	Wbscr27	chr5	+	134932368	134942637	3347	protein_coding	Williams_Beuren_syndrome_chromosome_region_27_(human)
ENSMUSG00000006931	538.691	354.679	470.275	332.552	239.33	273.245	-0.582107	0.00033298	0.00937591	P3h4	chr11	-	100408456	100414836	2178	protein_coding	prolyl_3-hydroxylase_family_member_4_(non-enzymatic)
ENSMUSG00000047414	379.632	142.778	275.386	141.335	112.317	128.586	-0.734719	0.00033569	0.00942272	Flrt2	chr12	+	95692226	95785215	7721	protein_coding	fibronectin_leucine_rich_transmembrane_protein_2
ENSMUSG00000001473	1208.32	1020.98	1089.68	835.538	863.899	691.148	-0.435234	0.00033591	0.00942272	Tubb6	chr18	+	67390717	67402748	1757	protein_coding	tubulin_beta_6_class_V
ENSMUSG00000063576	2157.4	2372.84	2174.28	2735.24	2805.83	3028.19	0.337699	0.00033805	0.00946483	Klhdc3	chr17	-	46674550	46680930	2126	protein_coding	kelch_domain_containing_3
ENSMUSG00000029017	2164.43	2390.97	2091.24	2787.2	2756.5	3063.55	0.353922	0.00034122	0.0095356	Pmpcb	chr5	+	21737141	21757152	5141	protein_coding	peptidase_(mitochondrial_processing)_beta
ENSMUSG00000041698	1751.4	1660.08	2363.24	3061.56	3825.09	2353.12	0.573301	0.00034212	0.00954267	Slco1a1	chr6	-	141907282	141946962	5276	protein_coding	solute_carrier_organic_anion_transporter_family_member_1a1
ENSMUSG00000056529	499.146	558.648	473.664	387.631	369.493	313.963	-0.465032	0.00034504	0.00960465	Ptafr	chr4	+	132564067	132582683	3637	protein_coding	platelet-activating_factor_receptor
ENSMUSG00000075229	456.086	483.859	458.412	613.144	634.016	610.782	0.385201	0.00034564	0.00960465	Ccdc58	chr16	+	36071660	36092118	1225	protein_coding	coiled-coil_domain_containing_58
ENSMUSG00000028211	970.171	1071.97	823.617	1131.72	1526.26	1643.75	0.516058	0.00035105	0.00973678	Trp53inp1	chr4	+	11156431	11174379	6475	protein_coding	transformation_related_protein_53_inducible_nuclear_protein_1
ENSMUSG00000030905	210.907	108.783	186.415	87.295	81.8762	96.4393	-0.693148	0.00035694	0.00988173	Crym	chr7	-	120186380	120202111	3391	protein_coding	crystallin_mu
ENSMUSG00000038520	965.777	999.447	961.733	1398.8	1297.42	1166.92	0.376642	0.00036281	0.0100256	Tbc1d17	chr7	-	44834623	44849079	9726	protein_coding	TBC1_domain_family_member_17
ENSMUSG00000038893	175.756	101.984	141.506	69.6282	76.6277	80.3661	-0.676606	0.00036542	0.0100789	Fam117a	chr11	+	95337018	95381872	3029	protein_coding	family_with_sequence_similarity_117_member_A
ENSMUSG00000046034	1008.84	914.46	938.008	1306.31	1204	1205.49	0.356192	0.00037179	0.0102352	Otulin	chr15	-	27605919	27630693	1491	protein_coding	OTU_deubiquitinase_with_linear_linkage_specificity
ENSMUSG00000037278	2670.61	2940.55	2776.74	3589.49	3412.56	3501.82	0.311712	0.00037246	0.0102352	Tmem97	chr11	-	78541817	78550777	1375	protein_coding	transmembrane_protein_97
ENSMUSG00000027611	275.057	257.227	220.309	138.217	166.901	177.877	-0.548877	0.00038098	0.01045	Procr	chr2	+	155751117	155755471	2031	protein_coding	protein_C_receptor_endothelial
ENSMUSG00000025212	482.449	397.739	435.534	340.866	281.318	289.318	-0.47673	0.00038452	0.0105275	Sfxn3	chr19	+	45047576	45056383	2966	protein_coding	sideroflexin_3
ENSMUSG00000021594	625.69	664.031	662.622	1393.6	979.365	770.443	0.57722	0.00038732	0.0105846	Srd5a1	chr13	-	69573449	69611442	2881	protein_coding	steroid_5_alpha-reductase_1
ENSMUSG00000060568	63.272	46.4595	49.9932	14.5492	27.2921	23.574	-0.769812	0.00038979	0.0106277	Fam78b	chr1	+	167001417	167091302	6325	protein_coding	family_with_sequence_similarity_78_member_B
ENSMUSG00000037148	376.117	332.016	353.342	260.846	256.126	200.379	-0.501104	0.00039033	0.0106277	Arhgap10	chr8	-	77250366	77517907	3038	protein_coding	Rho_GTPase_activating_protein_10
ENSMUSG00000034926	15043.8	21314.7	17839.1	23767.1	24425.4	33826.6	0.522281	0.00039183	0.0106491	Dhcr24	chr4	+	106561038	106589113	4028	protein_coding	24-dehydrocholesterol_reductase
ENSMUSG00000001632	554.509	565.446	589.75	386.592	431.425	442.549	-0.40811	0.00039355	0.0106517	Brpf1	chr6	+	113307137	113324860	6779	protein_coding	bromodomain_and_PHD_finger_containing_1
ENSMUSG00000027187	27200.8	33832.7	32462.5	39157	41172.2	42524.4	0.370701	0.00039396	0.0106517	Cat	chr2	-	103453849	103485160	2613	protein_coding	catalase
ENSMUSG00000093916	45.6964	52.1253	29.657	72.7458	136.46	79.2945	0.754693	0.00039408	0.0106517	Gm379	chrX	-	108664004	108664891	888	protein_coding	predicted_gene_379
ENSMUSG00000052135	140.604	75.9217	121.17	65.4713	30.4412	54.6489	-0.751531	0.00039701	0.0107114	Foxo6	chr4	-	120267079	120287349	2615	protein_coding	forkhead_box_O6
ENSMUSG00000021775	1928.92	1921.84	1750.61	2150.16	2718.71	2851.39	0.425978	0.0003979	0.010716	Nr1d2	chr14	-	18204054	18239127	5001	protein_coding	nuclear_receptor_subfamily_1_group_D_member_2
ENSMUSG00000005686	182.786	158.642	165.232	80.0204	117.566	106.083	-0.605474	0.00039889	0.0107231	Ampd3	chr7	+	110768206	110812405	5605	protein_coding	adenosine_monophosphate_deaminase_3
ENSMUSG00000020283	800.567	820.407	865.984	1066.25	1088.53	1045.83	0.345161	0.0004005	0.0107469	Pex13	chr11	-	23646479	23665959	4644	protein_coding	peroxisomal_biogenesis_factor_13
ENSMUSG00000031400	642.387	599.441	561.788	438.554	472.363	392.186	-0.43023	0.00040563	0.0108649	G6pdx	chrX	-	74409483	74429194	3080	protein_coding	glucose-6-phosphate_dehydrogenase_X-linked
ENSMUSG00000057722	141.483	165.441	178.789	64.432	70.3296	121.085	-0.685914	0.00040724	0.010885	Lepr	chr4	+	101717404	101815352	7049	protein_coding	leptin_receptor
ENSMUSG00000032549	469.267	265.159	370.288	267.081	159.554	178.948	-0.66456	0.00040835	0.010885	Rab6b	chr9	+	103111787	103185276	5031	protein_coding	RAB6B_member_RAS_oncogene_family
ENSMUSG00000029247	3842.02	3643.11	3963.02	4681.71	5275.77	4644.09	0.334063	0.00040858	0.010885	Paics	chr5	+	76951307	76967509	3139	protein_coding	phosphoribosylaminoimidazole_carboxylase_phosphoribosylaminoribosylaminoimidazole_succinocarboxamide_synthetase
ENSMUSG00000000402	137.968	57.7911	75.4134	42.6083	33.5902	37.5042	-0.763527	0.00041391	0.0110073	Egfl6	chrX	-	166523007	166585720	2704	protein_coding	EGF-like-domain_multiple_6
ENSMUSG00000041731	23.727	21.53	43.2144	53.0005	61.932	136.087	0.779861	0.00042717	0.0113197	Pgm5	chr19	-	24683016	24861855	3611	protein_coding	phosphoglucomutase_5
ENSMUSG00000021182	235.512	239.097	167.774	114.315	125.963	145.73	-0.600207	0.00042719	0.0113197	Ccdc88c	chr12	-	100912700	101028983	6313	protein_coding	coiled-coil_domain_containing_88C
ENSMUSG00000024011	117.756	80.4543	78.8028	48.8436	52.4847	32.1464	-0.723393	0.00042844	0.0113327	Pi16	chr17	+	29318877	29329413	3987	protein_coding	peptidase_inhibitor_16
ENSMUSG00000006386	156.422	227.765	255.897	336.709	306.511	438.263	0.612733	0.00043341	0.0114437	Tek	chr4	+	94739289	94874976	4712	protein_coding	endothelial-specific_receptor_tyrosine_kinase
ENSMUSG00000028024	538.691	784.146	643.133	829.303	1025.55	1104.77	0.517177	0.00044236	0.0116593	Enpep	chr3	-	129269175	129332720	4706	protein_coding	glutamyl_aminopeptidase
ENSMUSG00000028680	829.566	1079.9	685.5	1349.95	3682.33	4332.27	0.769746	0.00044953	0.0118272	Plk3	chr4	-	117128655	117133963	2531	protein_coding	polo-like_kinase_3
ENSMUSG00000021785	733.779	733.154	791.418	949.853	989.862	978.323	0.349382	0.00045397	0.0119229	Ngly1	chr14	+	16249280	16311926	5274	protein_coding	N-glycanase_1
ENSMUSG00000034282	182.786	96.3185	169.468	92.4911	53.5344	73.9368	-0.715871	0.00045676	0.0119751	Evpl	chr11	-	116220559	116238077	6384	protein_coding	envoplakin
ENSMUSG00000028782	71.181	35.1279	68.6347	20.7845	24.143	25.7171	-0.764779	0.00046246	0.0121032	Adgrb2	chr4	+	129984870	130022633	6487	protein_coding	adhesion_G_protein-coupled_receptor_B2
ENSMUSG00000052911	1209.2	793.212	1124.42	757.596	561.587	702.935	-0.540831	0.0004692	0.0122578	Lamb2	chr9	+	108479736	108490530	6082	protein_coding	laminin_beta_2
ENSMUSG00000033107	377.874	557.514	321.143	620.418	645.562	768.3	0.580599	0.00047061	0.0122732	Rnf125	chr18	+	20944625	20983848	1334	protein_coding	ring_finger_protein_125
ENSMUSG00000072664	524.63	598.308	571.956	751.361	738.985	744.725	0.375354	0.00047285	0.0122886	Ugt3a1	chr15	+	9273319	9315032	2670	protein_coding	UDP_glycosyltransferases_3_family_polypeptide_A1
ENSMUSG00000028538	1067.72	1351.86	1268.47	1735.51	1563	1665.18	0.398812	0.00047347	0.0122886	St3gal3	chr4	-	117932154	118134914	2768	protein_coding	ST3_beta-galactoside_alpha-23-sialyltransferase_3
ENSMUSG00000072964	152.907	201.702	144.048	64.432	107.069	101.797	-0.658699	0.00047369	0.0122886	Bhlhb9	chrX	+	135797594	135891081	4800	protein_coding	basic_helix-loop-helix_domain_containing_class_B9
ENSMUSG00000027822	826.051	786.413	765.997	1071.44	1326.81	956.892	0.450042	0.00048644	0.0125975	Slc33a1	chr3	-	63933507	63964768	3548	protein_coding	solute_carrier_family_33_(acetyl-CoA_transporter)_member_1
ENSMUSG00000029484	1452.62	1244.21	1240.51	968.559	1052.84	798.303	-0.439173	0.00049108	0.0126955	Anxa3	chr5	+	96793339	96845966	3643	protein_coding	annexin_A3
ENSMUSG00000057103	1493.04	1853.85	1870.93	2320.59	2242.15	2410.98	0.390127	0.0004985	0.0128582	Cml1	chr6	-	85910154	85915687	1345	protein_coding	camello-like_1
ENSMUSG00000020130	1069.47	1226.08	1135.44	1474.66	1525.21	1420.87	0.347067	0.00050003	0.0128582	Tbc1d15	chr10	-	115197877	115251493	3773	protein_coding	TBC1_domain_family_member_15
ENSMUSG00000022211	61.5144	69.1227	70.3294	29.0983	32.5405	37.5042	-0.708538	0.00050005	0.0128582	Lrrc16b	chr14	+	55491093	55508246	4580	protein_coding	leucine_rich_repeat_containing_16B
ENSMUSG00000068115	185.422	129.18	144.895	93.5304	98.6713	68.579	-0.639037	0.00050085	0.0128582	Ninl	chr2	-	150934519	151039382	5952	protein_coding	ninein-like
ENSMUSG00000038059	206.513	169.974	160.148	124.707	97.6216	107.155	-0.582653	0.00050405	0.0129181	Smim3	chr18	-	60474193	60501983	1984	protein_coding	small_integral_membrane_protein_3
ENSMUSG00000046056	110.726	78.188	97.4443	56.1182	41.9878	53.5774	-0.678336	0.00050862	0.0130128	Sbsn	chr7	+	30751471	30756134	3625	protein_coding	suprabasin
ENSMUSG00000021262	822.536	743.353	667.706	565.339	560.537	448.978	-0.455113	0.00051235	0.0130856	Evl	chr12	+	108554720	108688513	2695	protein_coding	Ena-vasodilator_stimulated_phosphoprotein
ENSMUSG00000026043	11010.2	10227.9	9468.2	8226.52	8069	6449.64	-0.401238	0.00051461	0.0131207	Col3a1	chr1	+	45311538	45349706	9816	protein_coding	collagen_type_III_alpha_1
ENSMUSG00000050721	1155.59	1186.42	1031.22	870.872	886.992	815.448	-0.366163	0.00051875	0.0132036	Plekho2	chr9	-	65554386	65580040	3271	protein_coding	pleckstrin_homology_domain_containing_family_O_member_2
ENSMUSG00000030148	450.813	411.337	363.51	270.199	318.058	242.17	-0.495131	0.00052417	0.0133188	Clec4a2	chr6	+	123106428	123143999	2926	protein_coding	C-type_lectin_domain_family_4_member_a2
ENSMUSG00000022443	9152.47	8733.26	9724.95	7369.15	6987.82	7696.93	-0.310513	0.00052548	0.0133293	Myh9	chr15	-	77760587	77842175	12928	protein_coding	myosin_heavy_polypeptide_9_non-muscle
ENSMUSG00000020607	391.056	177.906	227.088	155.884	132.262	127.514	-0.6838	0.00052821	0.0133756	Fam84a	chr12	-	14147599	14152038	3379	protein_coding	family_with_sequence_similarity_84_member_A
ENSMUSG00000034205	338.329	299.154	294.875	223.434	223.585	201.451	-0.469596	0.00053367	0.0134909	Loxl2	chr14	+	69609068	69695834	5405	protein_coding	lysyl_oxidase-like_2
ENSMUSG00000022130	264.512	310.486	289.791	383.475	411.48	407.188	0.435264	0.00053555	0.0134985	Tgds	chr14	-	118111911	118132765	2265	protein_coding	TDP-glucose_46-dehydratase
ENSMUSG00000028599	1871.8	1987.56	1687.91	1432.05	1474.82	1381.22	-0.350289	0.00053579	0.0134985	Tnfrsf1b	chr4	-	145213463	145246870	3818	protein_coding	tumor_necrosis_factor_receptor_superfamily_member_1b
ENSMUSG00000035314	265.391	156.376	233.866	149.649	112.317	111.441	-0.636024	0.00053708	0.013508	Gdpd5	chr7	+	99381414	99461877	6724	protein_coding	glycerophosphodiester_phosphodiesterase_domain_containing_5
ENSMUSG00000062901	1009.72	1137.69	785.486	1223.17	1453.83	1854.85	0.538221	0.00054185	0.0136049	Klhl24	chr16	+	20097554	20127744	6683	protein_coding	kelch-like_24
ENSMUSG00000046159	53.6054	49.859	36.4357	113.276	79.7768	81.4376	0.693935	0.00054785	0.0137323	Chrm3	chr13	-	9875486	10360844	4507	protein_coding	cholinergic_receptor_muscarinic_3_cardiac
ENSMUSG00000028603	59553	68705.7	67883.1	81954.4	81702	81911.2	0.310295	0.00056218	0.0140677	Scp2	chr4	-	108043839	108144998	3478	protein_coding	sterol_carrier_protein_2_liver
ENSMUSG00000031271	2201.34	1916.17	1637.06	3309.94	2757.55	2330.62	0.483841	0.00056751	0.014172	Serpina7	chrX	-	139079257	139085236	2448	protein_coding	serine_(or_cysteine)_peptidase_inhibitor_clade_A_(alpha-1_antiproteinase_antitrypsin)_member_7
ENSMUSG00000026463	342.723	293.488	297.417	219.277	203.641	226.097	-0.470224	0.00056826	0.014172	Atp2b4	chr1	-	133699457	133801041	12248	protein_coding	ATPase_Ca++_transporting_plasma_membrane_4
ENSMUSG00000074738	285.603	232.298	164.384	109.119	76.6277	160.732	-0.692929	0.00057363	0.014282	B930041F14Rik	chr4	+	155694342	155696481	2140	protein_coding	RIKEN_cDNA_B930041F14_gene
ENSMUSG00000037280	320.754	307.086	332.158	184.982	233.032	238.955	-0.485813	0.00057647	0.0143127	Galnt6	chr15	-	100691813	100729376	3871	protein_coding	UDP-N-acetyl-alpha-D-galactosamine:polypeptide_N-acetylgalactosaminyltransferase_6
ENSMUSG00000028497	474.54	373.943	413.503	309.689	303.362	265.744	-0.468612	0.00057679	0.0143127	Hacd4	chr4	-	88396144	88438928	6756	protein_coding	3-hydroxyacyl-CoA_dehydratase_4
ENSMUSG00000086165	10.5453	5.6658	8.47342	19.7453	28.3418	38.5757	0.756928	0.00058043	0.0143769	Gm15690	chr5	-	120479842	120480903	432	antisense	predicted_gene_15690
ENSMUSG00000036295	28.1209	46.4595	33.8937	72.7458	77.6774	67.5075	0.703931	0.00058132	0.0143769	Lrrn3	chr12	-	41451673	41485751	3180	protein_coding	leucine_rich_repeat_protein_3_neuronal
ENSMUSG00000032013	51.8479	54.3916	31.3517	12.4707	23.0933	15.0017	-0.760395	0.00058288	0.0143915	Trim29	chr9	+	43310763	43336125	2830	protein_coding	tripartite_motif-containing_29
ENSMUSG00000066113	326.905	209.634	326.227	182.904	178.448	174.662	-0.573188	0.0005856	0.0144346	Adamtsl1	chr4	+	86053915	86428385	10870	protein_coding	ADAMTS-like_1
ENSMUSG00000091345	55.363	27.1958	86.4289	16.6276	12.5963	25.7171	-0.760777	0.00059397	0.0146167	Col6a5	chr9	-	105856070	105960643	9421	protein_coding	collagen_type_VI_alpha_5
ENSMUSG00000034573	865.596	429.467	660.927	447.907	315.958	360.04	-0.627184	0.00059768	0.0146816	Ptpn13	chr5	+	103425192	103598303	12102	protein_coding	protein_tyrosine_phosphatase_non-receptor_type_13
ENSMUSG00000026176	3881.56	3968.32	3883.37	4785.64	4951.41	4622.66	0.281214	0.00059858	0.0146816	Ctdsp1	chr1	+	74391509	74397285	3334	protein_coding	CTD_(carboxy-terminal_domain_RNA_polymerase_II_polypeptide_A)_small_phosphatase_1
ENSMUSG00000022488	1831.37	1783.59	1538.77	1381.13	1315.27	1158.34	-0.389071	0.00060473	0.0147863	Nckap1l	chr15	+	103453825	103498800	4717	protein_coding	NCK_associated_protein_1_like
ENSMUSG00000025534	2048.43	2199.46	1992.1	1658.61	1699.46	1593.39	-0.31786	0.00060517	0.0147863	Gusb	chr5	-	129989011	130003049	4548	protein_coding	glucuronidase_beta
ENSMUSG00000030231	543.085	540.517	504.169	704.595	688.6	680.433	0.36252	0.00060584	0.0147863	Plekha5	chr6	+	140424054	140597110	9338	protein_coding	pleckstrin_homology_domain_containing_family_A_member_5
ENSMUSG00000090877	710.931	653.833	1114.25	372.043	423.027	626.855	-0.627585	0.00061285	0.0149175	Hspa1b	chr17	-	34956436	34959238	2803	protein_coding	heat_shock_protein_1B
ENSMUSG00000020029	3796.32	3827.81	3768.13	4758.62	4828.6	4432.99	0.288319	0.00061419	0.0149175	Nudt4	chr10	-	95547007	95564167	3231	protein_coding	nudix_(nucleoside_diphosphate_linked_moiety_X)-type_motif_4
ENSMUSG00000033715	4871.07	5707.72	4749.35	5923.59	8408.06	7276.88	0.44792	0.00061423	0.0149175	Akr1c14	chr13	+	4049011	4090422	2973	protein_coding	aldo-keto_reductase_family_1_member_C14
ENSMUSG00000064215	4486.16	4900.91	5087.44	7267.31	7261.79	5423.1	0.42363	0.0006217	0.015014	Ifi27	chr12	+	103434211	103440239	1467	protein_coding	interferon_alpha-inducible_protein_27
ENSMUSG00000021200	30.7572	52.1253	65.2453	84.1773	176.349	88.9384	0.742517	0.00062184	0.015014	Asb2	chr12	-	103321142	103356001	3542	protein_coding	ankyrin_repeat_and_SOCS_box-containing_2
ENSMUSG00000039304	165.21	226.632	198.278	301.376	286.567	287.175	0.501364	0.00062203	0.015014	Tnfsf10	chr3	+	27317028	27342427	5266	protein_coding	tumor_necrosis_factor_(ligand)_superfamily_member_10
ENSMUSG00000046447	3015.09	2773.97	3060.6	3573.9	4119	3636.83	0.337502	0.00062225	0.015014	Camk2n1	chr4	+	138454314	138460123	4444	protein_coding	calcium/calmodulin-dependent_protein_kinase_II_inhibitor_1
ENSMUSG00000040536	449.055	487.258	484.68	651.595	656.059	586.136	0.386191	0.00062472	0.015049	Necab1	chr4	-	14952245	15149794	5237	protein_coding	N-terminal_EF-hand_calcium_binding_protein_1
ENSMUSG00000043702	422.692	427.201	426.213	275.395	332.753	313.963	-0.427912	0.00062608	0.0150575	Pde12	chr14	-	26659958	26669883	7725	protein_coding	phosphodiesterase_12
ENSMUSG00000025877	1196.02	1197.75	1212.55	867.754	1022.4	792.945	-0.395278	0.00062821	0.0150841	Hk3	chr13	-	55005985	55021385	3682	protein_coding	hexokinase_3
ENSMUSG00000091694	81.7263	37.3943	64.398	21.8238	32.5405	18.2163	-0.751124	0.0006349	0.0152201	Apol11b	chr15	-	77633951	77643286	2458	protein_coding	apolipoprotein_L_11b
ENSMUSG00000033256	527.267	483.859	517.726	663.026	712.743	645.072	0.375005	0.00063863	0.0152849	Shf	chr2	-	122348892	122369162	2305	protein_coding	Src_homology_2_domain_containing_F
ENSMUSG00000073940	12943.5	5465.23	7720.13	3508.43	3885.97	2558.86	-0.753918	0.00063981	0.0152885	Hbb-bt	chr7	-	103812524	103813996	703	protein_coding	hemoglobin_beta_adult_t_chain
ENSMUSG00000001663	4944	5526.42	5200.14	6553.36	6211.04	6847.19	0.309668	0.00064351	0.0153431	Gstt1	chr10	-	75783813	75798584	1528	protein_coding	glutathione_S-transferase_theta_1
ENSMUSG00000035242	15521.9	15840.4	14481.9	19030.3	19343.8	18050.2	0.288339	0.00064417	0.0153431	Oaz1	chr10	+	80826656	80829290	2558	protein_coding	ornithine_decarboxylase_antizyme_1
ENSMUSG00000022323	6951.13	7686.22	8389.53	9285.49	9909.12	10788.3	0.358089	0.00064921	0.0154153	Hrsp12	chr15	-	34484021	34495255	3192	protein_coding	heat-responsive_protein_12
ENSMUSG00000029234	848.021	779.614	741.424	655.752	546.891	500.413	-0.433083	0.00064927	0.0154153	Tmem165	chr5	+	76183880	76209245	2588	protein_coding	transmembrane_protein_165
ENSMUSG00000048661	535.176	568.846	638.896	401.141	369.493	468.266	-0.445717	0.00065197	0.0154547	Lemd3	chr10	-	120923413	120979332	4809	protein_coding	LEM_domain_containing_3
ENSMUSG00000078783	64.1508	56.658	26.2676	7.27458	23.0933	15.0017	-0.752876	0.00065631	0.0155328	Gm9733	chr3	-	15296551	15332302	618	protein_coding	predicted_gene_9733
ENSMUSG00000053644	7528.49	9330.43	9828.32	11275.6	11654.8	13168.2	0.402294	0.000664	0.0156897	Aldh7a1	chr18	-	56509687	56572951	5181	protein_coding	aldehyde_dehydrogenase_family_7_member_A1
ENSMUSG00000041695	156.422	131.446	111.002	83.1381	79.7768	69.6506	-0.614066	0.00066692	0.0157118	Kcnj2	chr11	+	111066164	111076821	5444	protein_coding	potassium_inwardly-rectifying_channel_subfamily_J_member_2
ENSMUSG00000019966	442.025	257.227	348.258	216.159	207.84	226.097	-0.571405	0.00066785	0.0157118	Kitl	chr10	+	100015630	100100413	5765	protein_coding	kit_ligand
ENSMUSG00000062309	176.634	82.7206	134.727	87.295	44.0872	40.7188	-0.733964	0.00066811	0.0157118	Rpp25	chr9	+	57504102	57505447	1346	protein_coding	ribonuclease_P/MRP_25_subunit
ENSMUSG00000058818	990.383	853.269	735.493	625.614	652.91	532.559	-0.457473	0.00067517	0.0158526	Pirb	chr7	-	3711409	3720391	4471	protein_coding	paired_Ig-like_receptor_B
ENSMUSG00000016984	119.514	118.982	122.865	175.629	179.498	191.807	0.516001	0.00068011	0.0159433	Etaa1	chr11	-	17938756	17953875	4185	protein_coding	Ewing_tumor-associated_antigen_1
ENSMUSG00000018102	2485.18	2270.85	2354.76	2908.79	3117.59	2869.6	0.308657	0.00068246	0.0159733	Hist1h2bc	chr13	+	23684199	23692488	736	protein_coding	histone_cluster_1_H2bc
ENSMUSG00000036437	143.241	45.3264	60.1613	16.6276	37.789	30.0033	-0.752897	0.00068374	0.015978	Npy1r	chr8	+	66697422	66706798	3007	protein_coding	neuropeptide_Y_receptor_Y1
ENSMUSG00000031245	536.933	554.115	584.666	644.32	838.706	893.671	0.453029	0.00069002	0.0160994	Hmgn5	chrX	-	109004534	109013404	1934	protein_coding	high-mobility_group_nucleosome_binding_domain_5
ENSMUSG00000031351	208.27	104.251	204.209	97.6873	98.6713	64.2928	-0.690882	0.00069158	0.0161104	Zfp185	chrX	+	72987339	73031543	3707	protein_coding	zinc_finger_protein_185
ENSMUSG00000029048	3081	3006.27	3048.74	3879.43	3815.64	3561.82	0.289515	0.00069413	0.0161446	Rer1	chr4	-	155074110	155086382	1814	protein_coding	RER1_retention_in_endoplasmic_reticulum_1_homolog_(S._cerevisiae)
ENSMUSG00000021950	346.238	132.58	301.654	159.002	118.616	82.5092	-0.719579	0.00069545	0.0161499	Anxa8	chr14	+	34085981	34100571	1880	protein_coding	annexin_A8
ENSMUSG00000030934	8220.97	10887.4	12136.5	19323.4	14536.2	13258.3	0.512748	0.00071119	0.0164895	Oat	chr7	-	132557475	132576398	2155	protein_coding	ornithine_aminotransferase
ENSMUSG00000051674	445.54	479.326	510.1	637.046	643.463	619.354	0.377309	0.00071494	0.0165507	Dcun1d4	chr5	+	73481000	73560794	5807	protein_coding	DCN1_defective_in_cullin_neddylation_1_domain_containing_4_(S._cerevisiae)
ENSMUSG00000015627	176.634	89.5196	117.781	82.0989	38.8387	56.792	-0.71729	0.00071792	0.0165523	Gata5	chr2	-	180325133	180334699	3277	protein_coding	GATA_binding_protein_5
ENSMUSG00000013236	775.961	726.355	654.995	561.182	440.872	545.418	-0.434726	0.00071823	0.0165523	Ptprs	chr17	-	56412431	56476483	6970	protein_coding	protein_tyrosine_phosphatase_receptor_type_S
ENSMUSG00000021210	28613	34216.9	29528.2	38166.6	42088.6	38368.9	0.341358	0.00071835	0.0165523	Akr1c6	chr13	+	4434306	4457530	1849	protein_coding	aldo-keto_reductase_family_1_member_C6
ENSMUSG00000029381	1261.92	803.41	938.008	710.831	623.519	680.433	-0.502623	0.00072043	0.0165743	Shroom3	chr5	+	92683435	92965318	13128	protein_coding	shroom_family_member_3
ENSMUSG00000005148	32.5148	26.0627	28.8096	8.31381	12.5963	7.50083	-0.748697	0.00072445	0.0166409	Klf5	chr14	+	99298691	99313405	1721	protein_coding	Kruppel-like_factor_5
ENSMUSG00000039197	8200.75	8815.98	8819.98	10080.5	10730	11701.3	0.316093	0.00072677	0.016646	Adk	chr14	+	21052574	21448568	1781	protein_coding	adenosine_kinase
ENSMUSG00000020422	3730.41	3126.39	3368.18	2563.77	2609.54	2792.45	-0.340867	0.00072691	0.016646	Tns3	chr11	-	8431652	8664535	11182	protein_coding	tensin_3
ENSMUSG00000027864	913.05	900.862	823.617	721.223	577.332	657.93	-0.397586	0.00073665	0.0168429	Ptgfrn	chr3	-	101040232	101110278	10464	protein_coding	prostaglandin_F2_receptor_negative_regulator
ENSMUSG00000022436	536.054	498.59	471.122	342.945	405.182	342.895	-0.423846	0.00073909	0.0168729	Sh3bp1	chr15	+	78899667	78919517	4649	protein_coding	SH3-domain_binding_protein_1
ENSMUSG00000015087	1216.23	1168.29	1193.91	931.147	965.719	950.463	-0.314706	0.0007477	0.0170431	Rabl6	chr2	-	25583018	25608521	6379	protein_coding	RAB_member_RAS_oncogene_family-like_6
ENSMUSG00000031502	2900.85	3142.25	2960.61	2581.44	2209.61	2240.61	-0.337166	0.00075665	0.0172207	Col4a1	chr8	-	11198423	11312826	7447	protein_coding	collagen_type_IV_alpha_1
ENSMUSG00000037979	114.241	60.0574	93.2076	51.9613	40.9381	36.4326	-0.702748	0.00075989	0.0172681	Ccdc92	chr5	-	124834418	124862424	2729	protein_coding	coiled-coil_domain_containing_92
ENSMUSG00000028487	80.8476	33.9948	73.7188	16.6276	22.0436	33.218	-0.74418	0.00076242	0.017299	Bnc2	chr4	-	84275095	84675275	8174	protein_coding	basonuclin_2
ENSMUSG00000001053	181.028	140.512	226.24	109.119	113.367	107.155	-0.592604	0.00077255	0.0175021	N4bp3	chr11	-	51643063	51650842	2728	protein_coding	NEDD4_binding_protein_3
ENSMUSG00000041836	334.814	332.016	270.302	183.943	244.579	190.735	-0.513566	0.00079924	0.0180792	Ptpre	chr7	+	135537824	135686294	5411	protein_coding	protein_tyrosine_phosphatase_receptor_type_E
ENSMUSG00000090523	301.421	339.948	377.915	248.375	227.784	236.812	-0.460364	0.00080565	0.0181964	Gypc	chr18	-	32528322	32560034	2331	protein_coding	glycophorin_C
ENSMUSG00000026675	976.322	1167.15	1071.04	1586.9	1228.14	1702.69	0.443073	0.00080775	0.0182162	Hsd17b7	chr1	-	169949535	169969241	5104	protein_coding	hydroxysteroid_(17-beta)_dehydrogenase_7
ENSMUSG00000043079	1443.83	1354.13	1716.72	1149.38	914.284	1172.27	-0.435433	0.00081009	0.0182356	Synpo	chr18	-	60593973	60660142	9533	protein_coding	synaptopodin
ENSMUSG00000055407	39.545	32.8616	39.8251	6.23536	8.39756	21.4309	-0.740666	0.00081194	0.0182356	Map6	chr7	+	99267447	99337137	9152	protein_coding	microtubule-associated_protein_6
ENSMUSG00000032531	1423.62	1260.07	1562.5	1100.54	925.831	1112.27	-0.402123	0.0008123	0.0182356	Amotl2	chr9	+	102716672	102733418	6289	protein_coding	angiomotin-like_2
ENSMUSG00000002129	798.809	819.274	1004.1	676.536	594.127	646.143	-0.414355	0.00081456	0.0182587	Sf3a1	chr11	+	4160350	4182541	6147	protein_coding	splicing_factor_3a_subunit_1
ENSMUSG00000054675	864.717	515.587	560.94	445.828	423.027	321.464	-0.575771	0.00082583	0.018467	Tmem119	chr5	-	113793729	113800516	2315	protein_coding	transmembrane_protein_119
ENSMUSG00000001930	256.603	166.574	335.547	377.239	374.741	739.368	0.679558	0.00082634	0.018467	Vwf	chr6	+	125546774	125686679	16064	protein_coding	Von_Willebrand_factor_homolog
ENSMUSG00000054733	3551.14	3963.79	3831.68	4514.4	4762.47	4790.89	0.297299	0.00083922	0.0187033	Msra	chr14	-	64122623	64455903	1862	protein_coding	methionine_sulfoxide_reductase_A
ENSMUSG00000057400	23648.8	28308.6	26559.1	33486	31523.4	42017.5	0.409623	0.00083944	0.0187033	Ces1c	chr8	-	93099015	93131283	2323	protein_coding	carboxylesterase_1C
ENSMUSG00000049109	362.056	447.598	374.525	304.493	257.175	265.744	-0.458928	0.00084367	0.0187695	Themis	chr10	+	28668360	28883818	9031	protein_coding	thymocyte_selection_associated
ENSMUSG00000041481	521.994	531.452	579.582	653.673	819.812	742.582	0.404031	0.00086209	0.0191505	Serpina3g	chr12	+	104236245	104241939	2105	protein_coding	serine_(or_cysteine)_peptidase_inhibitor_clade_A_member_3G
ENSMUSG00000036599	325.148	226.632	253.355	173.551	151.156	191.807	-0.540619	0.00086722	0.0192357	Chst12	chr5	+	140505550	140525724	2362	protein_coding	carbohydrate_sulfotransferase_12
ENSMUSG00000040663	196.846	174.507	188.957	108.08	120.715	137.158	-0.525158	0.00087117	0.0192945	Clcf1	chr19	+	4214238	4223490	3713	protein_coding	cardiotrophin-like_cytokine_factor_1
ENSMUSG00000041261	1547.53	1839.12	1543.01	1973.49	2192.81	2382.05	0.380932	0.00088121	0.0194877	Car8	chr4	-	8143362	8239041	3853	protein_coding	carbonic_anhydrase_8
ENSMUSG00000033685	7103.16	6447.68	6011.04	5391.51	4991.3	5078.06	-0.322343	0.00088279	0.0194935	Ucp2	chr7	+	100493337	100502020	6989	protein_coding	uncoupling_protein_2_(mitochondrial_proton_carrier)
ENSMUSG00000042682	1803.25	1953.57	1706.55	2709.26	2645.23	2061.66	0.405054	0.00088764	0.0195716	Selk	chr14	+	29968308	29975074	1240	protein_coding	selenoprotein_K
ENSMUSG00000049577	1299.71	1025.51	1389.64	1543.25	1754.04	1859.13	0.427811	0.00090409	0.0199048	Zfpm1	chr8	+	122282141	122337251	3503	protein_coding	zinc_finger_protein_multitype_1
ENSMUSG00000056999	1218.86	1317.86	1387.95	1673.15	1699.46	1598.75	0.323702	0.00090654	0.0199192	Ide	chr19	-	37268743	37337852	5823	protein_coding	insulin_degrading_enzyme
ENSMUSG00000029762	572.963	503.123	511.795	358.533	378.94	426.476	-0.410853	0.00090743	0.0199192	Akr1b8	chr6	+	34354119	34368463	1499	protein_coding	aldo-keto_reductase_family_1_member_B8
ENSMUSG00000050565	2562.52	2840.83	3050.43	3742.25	3783.1	3358.23	0.343422	0.00090878	0.0199194	Tor1aip2	chr1	+	156035403	156068861	9218	protein_coding	torsin_A_interacting_protein_2
ENSMUSG00000032607	630.084	661.765	598.224	1099.5	815.613	779.015	0.456724	0.00091597	0.0200333	Amt	chr9	+	108296853	108302302	2437	protein_coding	aminomethyltransferase
ENSMUSG00000037573	3036.18	2965.48	2640.32	3189.39	4305.85	6098.18	0.545634	0.00091684	0.0200333	Tob1	chr11	+	94211454	94215495	2288	protein_coding	transducer_of_ErbB-2.1
ENSMUSG00000024065	972.807	1204.55	1280.33	1402.96	1601.83	2080.95	0.486848	0.00091895	0.0200333	Ehd3	chr17	+	73804841	73832093	3658	protein_coding	EH-domain_containing_3
ENSMUSG00000063286	788.264	620.971	642.285	467.652	522.748	500.413	-0.420252	0.00091983	0.0200333	Gm8995	chr7	-	106504239	106511671	7433	transcribed_unprocessed_pseudogene	predicted_gene_8995
ENSMUSG00000022408	98.4231	167.708	166.926	62.3536	81.8762	88.9384	-0.650952	0.00092293	0.0200333	Fam83f	chr15	+	80671847	80700420	2988	protein_coding	family_with_sequence_similarity_83_member_F
ENSMUSG00000029635	678.416	622.104	719.393	862.558	847.104	933.318	0.361293	0.00092307	0.0200333	Cdk8	chr5	+	146231230	146302874	9832	protein_coding	cyclin-dependent_kinase_8
ENSMUSG00000057229	537.812	574.512	560.093	698.36	700.146	834.735	0.386348	0.00092453	0.0200333	Atp5sl	chr7	+	25619414	25625551	3020	protein_coding	ATP5S-like
ENSMUSG00000037235	1738.22	1890.11	1670.11	2214.59	2262.09	2159.17	0.31025	0.00092565	0.0200333	Mxd4	chr5	-	34173883	34187720	8483	protein_coding	Max_dimerization_protein_4
ENSMUSG00000032330	2802.42	2983.61	2982.64	3453.35	3615.15	3724.7	0.287802	0.00092613	0.0200333	Cox7a2	chr9	-	79755241	79759853	754	protein_coding	cytochrome_c_oxidase_subunit_VIIa_2
ENSMUSG00000053062	336.572	341.081	399.098	470.77	478.661	529.344	0.415901	0.00093191	0.0201199	Jam2	chr16	+	84774123	84825928	5872	protein_coding	junction_adhesion_molecule_2
ENSMUSG00000069206	327.784	342.214	355.036	432.318	468.164	476.839	0.392871	0.00093285	0.0201199	Zfp874a	chr13	-	67424549	67451624	5263	protein_coding	zinc_finger_protein_874a
ENSMUSG00000029272	225.846	318.418	410.114	67.5497	58.7829	9.64393	-0.643388	0.00094361	0.0203225	Sult1e1	chr5	-	87575969	87591594	1242	protein_coding	sulfotransferase_family_1E_member_1
ENSMUSG00000015890	2705.76	3017.6	3554.6	4280.57	3769.45	4461.92	0.396918	0.00094871	0.0204028	Amdhd1	chr10	-	93523338	93540033	2421	protein_coding	amidohydrolase_domain_containing_1
ENSMUSG00000035621	2538.79	2364.9	2204.78	1991.16	1812.82	1742.34	-0.337754	0.00095286	0.0204624	Midn	chr10	+	80148272	80158368	4307	protein_coding	midnolin
ENSMUSG00000041650	1198.65	1424.38	1376.93	1707.45	1705.75	1705.9	0.336644	0.00095558	0.0204911	Pcca	chr14	+	122534324	122891100	5210	protein_coding	propionyl-Coenzyme_A_carboxylase_alpha_polypeptide
ENSMUSG00000002588	7503.88	9741.77	9359.74	11740.1	11039.6	12611	0.381555	0.00096715	0.0207093	Pon1	chr6	-	5168090	5193946	2898	protein_coding	paraoxonase_1
ENSMUSG00000003352	432.359	337.681	344.868	261.885	242.48	272.173	-0.464001	0.0009708	0.0207155	Cacnb3	chr15	+	98632220	98644530	3120	protein_coding	calcium_channel_voltage-dependent_beta_3_subunit
ENSMUSG00000029373	392.814	296.888	313.517	232.787	213.088	241.098	-0.480781	0.0009716	0.0207155	Pf4	chr5	+	90772435	90773383	721	protein_coding	platelet_factor_4
ENSMUSG00000020034	404.238	371.676	275.386	481.162	487.058	618.283	0.510341	0.00097163	0.0207155	Tcp11l2	chr10	+	84576626	84614359	3438	protein_coding	t-complex_11_(mouse)_like_2
ENSMUSG00000056413	498.267	458.93	475.359	377.239	361.095	318.25	-0.403192	0.00097995	0.0208582	Adap1	chr5	-	139271876	139325622	3292	protein_coding	ArfGAP_with_dual_PH_domains_1
ENSMUSG00000060509	20.2119	18.1305	16.0995	56.1182	40.9381	34.2895	0.722778	0.00098113	0.0208582	Xcr1	chr9	-	123852315	123862029	4453	protein_coding	chemokine_(C_motif)_receptor_1
ENSMUSG00000031844	1862.13	1933.17	2386.96	3957.37	2868.82	2458.13	0.505131	0.00098298	0.0208677	Hsd17b2	chr8	+	117701946	117759029	1280	protein_coding	hydroxysteroid_(17-beta)_dehydrogenase_2
ENSMUSG00000049858	1151.2	1278.2	1471.83	1996.35	1588.19	1747.69	0.411443	0.00099045	0.0209962	Suox	chr10	-	128669887	128673918	2349	protein_coding	sulfite_oxidase
ENSMUSG00000024583	2560.76	2506.55	2122.59	3045.97	3412.56	2944.61	0.361999	0.00099217	0.0210026	Txnl1	chr18	-	63662801	63692359	2558	protein_coding	thioredoxin-like_1
ENSMUSG00000034993	3227.75	3095.79	2963.16	2513.89	2600.09	2340.26	-0.302757	0.00099382	0.0210076	Vat1	chr11	-	101458745	101466230	2766	protein_coding	vesicle_amine_transport_protein_1_homolog_(T_californica)
ENSMUSG00000060212	335.693	191.504	283.012	194.335	131.212	146.802	-0.607264	0.00099684	0.0210414	Pcnxl2	chr8	-	125751508	125898317	9574	protein_coding	pecanex-like_2_(Drosophila)
ENSMUSG00000048402	79.09	64.5901	90.6656	39.4906	38.8387	46.0765	-0.657456	0.00100341	0.02115	Gli2	chr1	-	118834132	119053619	6869	protein_coding	GLI-Kruppel_family_member_GLI2
ENSMUSG00000061778	716.204	741.086	684.652	896.852	886.992	951.534	0.333974	0.00100709	0.0211975	Mospd2	chrX	-	164936169	164980375	7914	protein_coding	motile_sperm_domain_containing_2
ENSMUSG00000039238	229.361	250.428	390.625	200.571	158.504	158.589	-0.593656	0.00100864	0.0212	Zfp750	chr11	-	121510978	121519333	3232	protein_coding	zinc_finger_protein_750
ENSMUSG00000043088	159.938	95.1854	133.033	85.2166	65.0811	65.3644	-0.634938	0.00101459	0.0212711	Il17re	chr6	+	113458484	113470758	5868	protein_coding	interleukin_17_receptor_E
ENSMUSG00000067786	119.514	64.5901	75.4134	42.6083	15.7454	47.1481	-0.723301	0.00101489	0.0212711	Nnat	chr2	+	157560078	157562522	1829	protein_coding	neuronatin
ENSMUSG00000024981	4736.61	5121.88	5260.3	5737.57	6810.42	6881.48	0.340864	0.00102297	0.0214103	Acsl5	chr19	+	55253369	55296627	3150	protein_coding	acyl-CoA_synthetase_long-chain_family_member_5
ENSMUSG00000053560	1757.56	1011.91	910.045	787.734	808.265	557.205	-0.602978	0.00102992	0.0215252	Ier2	chr8	-	84661331	84662852	1522	protein_coding	immediate_early_response_2
ENSMUSG00000028793	2200.46	2447.62	2148.86	2615.73	3255.1	3038.91	0.364614	0.00103168	0.0215319	Rnf19b	chr4	+	129058271	129085886	2872	protein_coding	ring_finger_protein_19B
ENSMUSG00000046916	108.968	115.582	129.643	164.198	176.349	206.809	0.527983	0.00105886	0.0220576	Myct1	chr10	+	5593728	5606787	2775	protein_coding	myc_target_1
ENSMUSG00000024038	1664.41	1628.35	1650.62	2111.71	2105.69	1922.36	0.298762	0.00105985	0.0220576	Ndufv3	chr17	+	31520115	31531326	2490	protein_coding	NADH_dehydrogenase_(ubiquinone)_flavoprotein_3
ENSMUSG00000058099	755.749	717.29	623.644	466.613	560.537	513.271	-0.406242	0.0010623	0.0220759	Nfam1	chr15	-	82997721	83033306	3222	protein_coding	Nfat_activating_molecule_with_ITAM_motif_1
ENSMUSG00000026305	1594.1	1469.71	1530.3	1226.29	1197.7	1260.14	-0.304275	0.0010637	0.0220759	Lrrfip1	chr1	+	90998737	91128944	6469	protein_coding	leucine_rich_repeat_(in_FLII)_interacting_protein_1
ENSMUSG00000022667	224.088	250.428	197.431	144.452	167.951	121.085	-0.529363	0.0010706	0.0221664	Cd200r1	chr16	+	44765736	44794978	2034	protein_coding	CD200_receptor_1
ENSMUSG00000071337	319.875	291.222	308.433	194.335	219.386	236.812	-0.447509	0.00107105	0.0221664	Tia1	chr6	+	86404219	86433405	15750	protein_coding	cytotoxic_granule-associated_RNA_binding_protein_1
ENSMUSG00000037060	398.086	249.295	307.585	228.63	196.293	180.02	-0.54737	0.00107397	0.0221959	Prkcdbp	chr7	-	105480607	105482197	1035	protein_coding	protein_kinase_C_delta_binding_protein
ENSMUSG00000041920	209.149	175.64	268.607	139.256	151.156	107.155	-0.577493	0.00107579	0.0222027	Slc16a6	chr11	-	109450855	109473598	4883	protein_coding	solute_carrier_family_16_(monocarboxylic_acid_transporters)_member_6
ENSMUSG00000027457	37.7874	23.7963	28.8096	6.23536	13.646	9.64393	-0.722323	0.0010843	0.0223264	Snph	chr2	-	151590549	151632593	7861	protein_coding	syntaphilin
ENSMUSG00000042249	389.299	400.005	341.479	251.493	285.517	276.459	-0.427901	0.00108627	0.0223264	Adrbk2	chr5	-	112910482	113015791	8693	protein_coding	adrenergic_receptor_kinase_beta_2
ENSMUSG00000033429	935.898	1017.58	978.68	1209.66	1284.83	1200.13	0.317262	0.00108959	0.0223264	Mcee	chr7	+	64392607	64412125	956	protein_coding	methylmalonyl_CoA_epimerase
ENSMUSG00000034156	79.09	48.7258	60.1613	36.3729	26.2424	25.7171	-0.695551	0.00109002	0.0223264	Bzrap1	chr11	+	87760541	87785928	9499	protein_coding	benzodiazepine_receptor_associated_protein_1
ENSMUSG00000028776	1007.96	1219.28	1225.26	1561.96	1405.54	1583.75	0.370933	0.00109092	0.0223264	Tinagl1	chr4	-	130164454	130175122	4358	protein_coding	tubulointerstitial_nephritis_antigen-like_1
ENSMUSG00000069515	137.089	109.916	117.781	82.0989	74.5283	60.0067	-0.592716	0.00109102	0.0223264	Lyz1	chr10	-	117287796	117292868	1264	protein_coding	lysozyme_1
ENSMUSG00000008305	1482.5	1612.49	1607.41	1972.45	1915.69	1938.43	0.296036	0.00109232	0.0223264	Tle1	chr4	-	72117142	72200919	8711	protein_coding	transducin-like_enhancer_of_split_1_homolog_of_Drosophila_E(spl)
ENSMUSG00000020282	1034.32	994.914	1071.04	854.244	720.091	814.376	-0.352791	0.0010959	0.0223412	Rhbdf1	chr11	-	32209585	32222300	5433	protein_coding	rhomboid_family_1_(Drosophila)
ENSMUSG00000018927	2482.55	1837.98	1930.25	1354.11	1617.58	1549.46	-0.423578	0.00109748	0.0223412	Ccl6	chr11	-	83587882	83593087	1795	protein_coding	chemokine_(C-C_motif)_ligand_6
ENSMUSG00000006395	1103.74	1303.13	1004.95	1514.15	1867.41	1400.51	0.438319	0.00109798	0.0223412	Hyi	chr4	+	118359990	118362744	2209	polymorphic_pseudogene	hydroxypyruvate_isomerase_(putative)
ENSMUSG00000026197	705.659	856.668	739.73	1011.17	1135.77	941.89	0.391828	0.00109907	0.0223412	Zfand2b	chr1	+	75168646	75171629	1772	protein_coding	zinc_finger_AN1_type_domain_2B
ENSMUSG00000058806	86.999	117.849	145.743	210.963	175.299	192.879	0.578626	0.00110568	0.0224449	Col13a1	chr10	-	61838236	61979108	4605	protein_coding	collagen_type_XIII_alpha_1
ENSMUSG00000037104	448.177	404.538	378.762	314.886	238.281	305.391	-0.460638	0.00112802	0.0228671	Socs5	chr17	+	87107679	87137583	4392	protein_coding	suppressor_of_cytokine_signaling_5
ENSMUSG00000055298	19.3331	19.2637	28.8096	4.15691	9.44725	3.21464	-0.697726	0.00113279	0.0229325	Ctsj	chr13	-	61000278	61005916	1276	protein_coding	cathepsin_J
ENSMUSG00000040732	180.149	259.493	270.302	308.65	375.791	422.19	0.535573	0.00113924	0.0229603	Erg	chr16	-	95359169	95586593	3466	protein_coding	avian_erythroblastosis_virus_E-26_(v-ets)_oncogene_related
ENSMUSG00000028461	1013.23	1308.8	1241.36	1613.92	1627.03	1496.95	0.380837	0.0011403	0.0229603	Ccdc107	chr4	+	43492900	43495921	1547	protein_coding	coiled-coil_domain_containing_107
ENSMUSG00000056054	699.507	960.919	739.73	410.494	658.159	277.531	-0.624661	0.00114197	0.0229603	S100a8	chr3	+	90668978	90670035	694	protein_coding	S100_calcium_binding_protein_A8_(calgranulin_A)
ENSMUSG00000028238	1185.47	1479.91	1137.98	937.382	957.322	936.532	-0.390582	0.0011425	0.0229603	Atp6v0d2	chr4	-	19876841	19922605	2716	protein_coding	ATPase_H+_transporting_lysosomal_V0_subunit_D2
ENSMUSG00000068747	731.143	797.744	629.575	547.672	542.692	507.914	-0.396188	0.00114352	0.0229603	Sort1	chr3	+	108284082	108361511	7569	protein_coding	sortilin_1
ENSMUSG00000048677	538.691	540.517	406.724	312.807	343.25	376.113	-0.463101	0.00114465	0.0229603	Tpcn2	chr7	-	145186524	145284011	5256	protein_coding	two_pore_segment_channel_2
ENSMUSG00000033059	1148.56	1016.44	969.359	750.321	807.215	839.022	-0.361423	0.001145	0.0229603	Pygb	chr2	+	150786735	150831758	4809	protein_coding	brain_glycogen_phosphorylase
ENSMUSG00000085890	23.727	19.2637	18.6415	4.15691	4.19878	7.50083	-0.700447	0.00114671	0.0229635	Tnfsf13os	chr11	+	69682138	69691141	1109	antisense	tumor_necrosis_factor_(ligand)_superfamily_member_13_opposite_strand
ENSMUSG00000011831	1357.71	1383.59	1476.07	1639.9	1834.87	1878.42	0.325252	0.00115399	0.0230782	Evi5	chr5	-	107744795	107875107	8060	protein_coding	ecotropic_viral_integration_site_5
ENSMUSG00000039682	5406.24	6473.74	6309.31	7741.2	8156.13	7312.24	0.331995	0.00115891	0.0231222	Lap3	chr5	+	45493374	45512691	3098	protein_coding	leucine_aminopeptidase_3
ENSMUSG00000026288	807.597	812.475	716.004	593.398	632.966	525.058	-0.382936	0.0011593	0.0231222	Inpp5d	chr1	+	87620312	87720507	7602	protein_coding	inositol_polyphosphate-5-phosphatase_D
ENSMUSG00000035049	367.329	300.287	428.755	256.689	254.026	241.098	-0.478407	0.00116242	0.0231532	Rrp12	chr19	-	41862852	41896153	4319	protein_coding	ribosomal_RNA_processing_12_homolog_(S._cerevisiae)
ENSMUSG00000026832	464.873	352.413	301.654	242.14	266.623	221.81	-0.520236	0.00116589	0.0231912	Cytip	chr2	-	58129137	58195532	6744	protein_coding	cytohesin_1_interacting_protein
ENSMUSG00000001998	269.785	180.172	247.424	149.649	141.709	157.517	-0.53447	0.00117058	0.0232533	Ap4e1	chr2	+	127008717	127067909	9810	protein_coding	adaptor-related_protein_complex_AP-4_epsilon_1
ENSMUSG00000042032	1207.44	1144.49	1010.88	1428.94	1474.82	1410.16	0.338579	0.00117711	0.0233295	Mat2b	chr11	-	40679314	40695203	5001	protein_coding	methionine_adenosyltransferase_II_beta
ENSMUSG00000032537	242.543	74.7885	156.758	91.4519	57.7332	56.792	-0.707678	0.00117756	0.0233295	Ephb1	chr9	-	101922128	102354693	6487	protein_coding	Eph_receptor_B1
ENSMUSG00000034342	753.113	644.768	660.079	419.847	556.338	507.914	-0.426382	0.00118531	0.023445	Cbl	chr9	-	44142976	44234049	12345	protein_coding	Casitas_B-lineage_lymphoma
ENSMUSG00000015083	5244.55	6548.53	7132.93	8729.5	8303.09	8191.98	0.382693	0.00118655	0.023445	C8g	chr2	-	25498651	25501719	1493	protein_coding	complement_component_8_gamma_polypeptide
ENSMUSG00000059554	223.21	220.966	197.431	299.297	292.865	300.033	0.429753	0.00119244	0.0235301	Ccdc28a	chr10	-	18213676	18234998	2964	protein_coding	coiled-coil_domain_containing_28A
ENSMUSG00000000581	1289.17	1379.05	1336.26	1660.68	1666.92	1618.04	0.291872	0.00119547	0.0235586	C1d	chr11	+	17257579	17269176	3995	protein_coding	C1D_nuclear_receptor_co-repressor
ENSMUSG00000023046	4781.43	2070.28	3249.56	1760.45	1220.8	1400.51	-0.706799	0.00119873	0.0235915	Igfbp6	chr15	+	102144362	102149511	1112	protein_coding	insulin-like_growth_factor_binding_protein_6
ENSMUSG00000058881	289.997	257.227	311.822	192.257	153.255	223.953	-0.508116	0.0012009	0.0236029	Zfp516	chr18	+	82910879	83005314	7817	protein_coding	zinc_finger_protein_516
ENSMUSG00000039405	550.115	327.483	477.054	336.709	259.275	256.1	-0.550786	0.00120325	0.0236178	Prss23	chr7	-	89507783	89527187	3767	protein_coding	protease_serine_23
ENSMUSG00000039653	3044.09	3935.46	3704.58	4675.48	4478	4831.61	0.362188	0.00120531	0.023627	Baat	chr4	-	49489422	49506557	1941	protein_coding	bile_acid-Coenzyme_A:_amino_acid_N-acyltransferase
ENSMUSG00000031442	48.3328	46.4595	39.8251	22.863	18.8945	18.2163	-0.700763	0.00120844	0.023657	Mcf2l	chr8	+	12873806	13020905	12760	protein_coding	mcf.2_transforming_sequence-like
ENSMUSG00000025969	792.658	781.88	745.661	548.711	558.438	654.716	-0.368838	0.00122544	0.0239582	Nrp2	chr1	+	62703285	62818695	11842	protein_coding	neuropilin_2
ENSMUSG00000036246	711.81	699.159	612.628	513.378	534.295	480.053	-0.374766	0.00122773	0.0239714	Gmip	chr8	+	69808679	69821870	5552	protein_coding	Gem-interacting_protein
ENSMUSG00000087579	66.7871	74.7885	52.5352	119.511	132.262	90.01	0.618555	0.00123222	0.0239998	1500017E21Rik	chr19	-	36614052	36705641	3977	processed_transcript	RIKEN_cDNA_1500017E21_gene
ENSMUSG00000019989	501.782	711.624	587.208	766.949	920.582	851.88	0.444418	0.00123242	0.0239998	Enpp3	chr10	-	24773814	24836195	2815	protein_coding	ectonucleotide_pyrophosphatase/phosphodiesterase_3
ENSMUSG00000022180	437.631	521.253	454.175	368.925	339.051	326.822	-0.407403	0.00124018	0.0241192	Slc7a8	chr14	-	54722216	54781886	4033	protein_coding	solute_carrier_family_7_(cationic_amino_acid_transporter_y+_system)_member_8
ENSMUSG00000025498	1685.5	2189.26	2692.01	4175.61	3398.91	2617.79	0.530164	0.00124375	0.0241571	Irf7	chr7	-	141262706	141266481	3020	protein_coding	interferon_regulatory_factor_7
ENSMUSG00000027293	1250.5	1185.28	1149	1018.44	897.489	851.88	-0.349298	0.00124948	0.0242367	Ehd4	chr2	-	120089175	120154606	4007	protein_coding	EH-domain_containing_4
ENSMUSG00000064202	15.818	27.1958	15.2522	46.7652	48.286	39.6473	0.706057	0.00125743	0.0243591	4430402I18Rik	chr19	-	28893042	28967800	5420	protein_coding	RIKEN_cDNA_4430402I18_gene
ENSMUSG00000018008	1742.62	1730.33	1451.5	1273.05	1331.01	1087.62	-0.382878	0.00126203	0.0244162	Cyth4	chr15	+	78597047	78622019	2791	protein_coding	cytohesin_4
ENSMUSG00000000126	201.24	73.6554	166.079	75.8635	76.6277	56.792	-0.687055	0.0012647	0.0244168	Wnt9a	chr11	+	59306928	59333552	3329	protein_coding	wingless-type_MMTV_integration_site_family_member_9A
ENSMUSG00000056481	239.906	108.783	215.225	101.844	106.019	96.4393	-0.642738	0.00126535	0.0244168	Cd248	chr19	+	5068078	5070637	2560	protein_coding	CD248_antigen_endosialin
ENSMUSG00000096674	26.3633	11.3316	16.0995	102.883	99.721	12.8586	0.685537	0.00127983	0.0246143	Mup15	chr4	-	61435790	61439743	925	protein_coding	major_urinary_protein_15
ENSMUSG00000037784	118.635	90.6527	88.9709	56.1182	58.7829	56.792	-0.608039	0.00128049	0.0246143	Dzip1l	chr9	+	99629496	99669256	7984	protein_coding	DAZ_interacting_protein_1-like
ENSMUSG00000032261	872.626	973.384	827.006	1148.35	1129.47	1139.05	0.334968	0.00128129	0.0246143	Sh3bgrl2	chr9	+	83548327	83638801	7865	protein_coding	SH3_domain_binding_glutamic_acid-rich_protein_like_2
ENSMUSG00000032042	4450.13	4940.57	4838.32	5762.51	6305.52	5630.98	0.300367	0.00128383	0.0246143	Srpr	chr9	+	35200175	35247973	3364	protein_coding	signal_recognition_particle_receptor_('docking_protein')
ENSMUSG00000028862	189.816	130.313	189.805	97.6873	108.119	110.369	-0.561921	0.00128388	0.0246143	Map3k6	chr4	+	133240818	133252929	4604	protein_coding	mitogen-activated_protein_kinase_kinase_kinase_6
ENSMUSG00000034612	203.876	182.439	155.064	104.962	100.771	135.015	-0.547459	0.00130789	0.0249958	Chst11	chr10	+	82985498	83195900	5527	protein_coding	carbohydrate_sulfotransferase_11
ENSMUSG00000034330	565.054	511.055	466.038	386.592	398.884	345.038	-0.40746	0.00130859	0.0249958	Plcg2	chr8	+	117498291	117635140	4296	protein_coding	phospholipase_C_gamma_2
ENSMUSG00000060613	3220.72	3272.56	4650.21	6839.15	5242.18	4607.65	0.499132	0.00130883	0.0249958	Cyp2c70	chr19	-	40153353	40187333	1981	protein_coding	cytochrome_P450_family_2_subfamily_c_polypeptide_70
ENSMUSG00000021662	65.0296	26.0627	59.3139	19.7453	7.34786	23.574	-0.710323	0.00131288	0.0250144	Arhgef28	chr13	-	97898595	98206165	6259	protein_coding	Rho_guanine_nucleotide_exchange_factor_(GEF)_28
ENSMUSG00000015176	884.929	712.757	978.68	697.321	574.183	530.416	-0.456908	0.00131317	0.0250144	Nolc1	chr19	+	46075863	46085528	3634	protein_coding	nucleolar_and_coiled-body_phosphoprotein_1
ENSMUSG00000024247	1647.71	1698.61	2248.85	1301.11	1424.44	1360.87	-0.412053	0.001317	0.0250551	Pkdcc	chr17	+	83215292	83225070	2712	protein_coding	protein_kinase_domain_containing_cytoplasmic
ENSMUSG00000027947	1167.02	1577.36	1484.54	675.497	741.085	1219.42	-0.554575	0.0013238	0.0251243	Il6ra	chr3	-	89864059	89913196	8642	protein_coding	interleukin_6_receptor_alpha
ENSMUSG00000019139	1318.17	1171.69	1177.81	966.48	888.042	1002.97	-0.338846	0.00132402	0.0251243	Isyna1	chr8	+	70594481	70597288	1836	protein_coding	myo-inositol_1-phosphate_synthase_A1
ENSMUSG00000022339	327.784	383.008	381.304	520.652	537.444	442.549	0.416238	0.00133209	0.0252114	Ebag9	chr15	+	44619641	44641024	1561	protein_coding	estrogen_receptor-binding_fragment-associated_gene_9
ENSMUSG00000060862	210.907	213.034	244.882	138.217	138.56	172.519	-0.494751	0.00133557	0.0252114	Zbtb40	chr4	-	136979732	137048801	10710	protein_coding	zinc_finger_and_BTB_domain_containing_40
ENSMUSG00000017774	3880.68	3213.64	3740.17	2643.79	2518.22	3075.34	-0.367354	0.00133595	0.0252114	Myo1c	chr11	+	75650504	75673910	6585	protein_coding	myosin_IC
ENSMUSG00000020010	3450.08	4289.01	4010.47	3296.43	2817.38	2831.03	-0.365271	0.00133857	0.0252114	Vnn3	chr10	+	23851462	23869843	1811	protein_coding	vanin_3
ENSMUSG00000029161	369.965	309.352	349.105	268.12	241.43	220.739	-0.441999	0.00133876	0.0252114	Cgref1	chr5	-	30933143	30945591	2082	protein_coding	cell_growth_regulator_with_EF_hand_domain_1
ENSMUSG00000021211	1283.02	1555.83	1414.21	1722	1802.33	2113.09	0.376322	0.0013407	0.0252114	Akr1c12	chr13	-	4268172	4279433	1265	protein_coding	aldo-keto_reductase_family_1_member_C12
ENSMUSG00000049115	744.325	881.598	857.51	1279.29	960.471	1157.27	0.410948	0.00134203	0.0252114	Agtr1a	chr13	+	30336441	30382867	2467	protein_coding	angiotensin_II_receptor_type_1a
ENSMUSG00000031618	186.301	186.971	155.064	302.415	230.933	250.742	0.492269	0.00134311	0.0252114	Nr3c2	chr8	+	76899442	77245012	6474	protein_coding	nuclear_receptor_subfamily_3_group_C_member_2
ENSMUSG00000038843	282.966	188.104	249.119	171.472	145.908	146.802	-0.530777	0.00134391	0.0252114	Gcnt1	chr19	-	17326141	17356667	5571	protein_coding	glucosaminyl_(N-acetyl)_transferase_1_core_2
ENSMUSG00000037405	1480.74	1376.79	1361.68	1152.5	1130.52	1100.48	-0.303355	0.00136044	0.0254893	Icam1	chr9	+	21015960	21028797	2540	protein_coding	intercellular_adhesion_molecule_1
ENSMUSG00000037722	1743.5	2001.16	1947.19	2343.46	2503.52	2305.97	0.313115	0.00138601	0.0259356	Gnpnat1	chr14	-	45376334	45388802	2629	protein_coding	glucosamine-phosphate_N-acetyltransferase_1
ENSMUSG00000047496	259.239	371.676	281.318	406.337	413.58	637.571	0.551861	0.00139593	0.0260885	Rnf152	chr1	-	105276914	105356710	8532	protein_coding	ring_finger_protein_152
ENSMUSG00000071176	314.602	222.099	253.355	197.453	133.311	170.376	-0.541686	0.00139962	0.0261094	Arhgef10	chr8	+	14911663	15001085	9210	protein_coding	Rho_guanine_nucleotide_exchange_factor_(GEF)_10
ENSMUSG00000032643	166.089	152.977	130.491	99.7657	99.721	84.6523	-0.542305	0.00140057	0.0261094	Fhl3	chr4	+	124700701	124708611	1683	protein_coding	four_and_a_half_LIM_domains_3
ENSMUSG00000060131	231.119	210.768	165.232	119.511	148.007	118.942	-0.536861	0.00140284	0.026119	Atp8b4	chr2	-	126320973	126500674	6660	protein_coding	ATPase_class_I_type_8B_member_4
ENSMUSG00000029661	5917.69	6530.4	5226.41	4610.01	4804.45	3753.63	-0.389414	0.00140677	0.0261593	Col1a2	chr6	+	4504814	4541544	12426	protein_coding	collagen_type_I_alpha_2
ENSMUSG00000018166	1319.92	2040.82	1224.41	2454.65	2077.35	2352.05	0.501123	0.00141189	0.0262215	Erbb3	chr10	-	128567523	128589652	6016	protein_coding	erb-b2_receptor_tyrosine_kinase_3
ENSMUSG00000038611	666.114	625.504	683.805	459.338	516.45	531.488	-0.363566	0.00141392	0.0262221	Phrf1	chr7	+	141228784	141262750	6765	protein_coding	PHD_and_ring_finger_domains_1
ENSMUSG00000047821	92.2717	65.7232	90.6656	32.216	50.3854	48.2196	-0.649639	0.00141652	0.0262221	Trim16	chr11	+	62820231	62850808	4568	protein_coding	tripartite_motif-containing_16
ENSMUSG00000028066	631.841	671.963	605.002	765.91	852.352	842.236	0.344211	0.00141722	0.0262221	Pmf1	chr3	-	88394143	88410331	4063	protein_coding	polyamine-modulated_factor_1
ENSMUSG00000022982	15909.4	18223.5	15860.5	19625.8	21008.6	22066.4	0.310275	0.00142241	0.0262853	Sod1	chr16	+	90220742	90226322	646	protein_coding	superoxide_dismutase_1_soluble
ENSMUSG00000033032	72.9386	98.5849	99.9864	130.943	136.46	190.735	0.58792	0.00142949	0.0263833	Afap1l1	chr18	-	61730261	61786702	3680	protein_coding	actin_filament_associated_protein_1-like_1
ENSMUSG00000047866	5187.43	5944.55	5942.41	7923.06	6795.72	7013.28	0.328205	0.00143215	0.0263995	Lonp2	chr8	+	86624043	86723873	5346	protein_coding	lon_peptidase_2_peroxisomal
ENSMUSG00000019558	1227.65	1235.14	1272.71	1072.48	937.378	917.245	-0.331291	0.00143825	0.0264791	Slc6a8	chrX	+	73673150	73682502	5210	protein_coding	solute_carrier_family_6_(neurotransmitter_transporter_creatine)_member_8
ENSMUSG00000033697	232.876	284.423	230.477	173.551	167.951	173.591	-0.467146	0.00144249	0.0265243	Arhgap39	chr15	-	76723985	76818170	7367	protein_coding	Rho_GTPase_activating_protein_39
ENSMUSG00000006315	2174.1	2053.28	2185.3	2856.83	2711.36	2462.42	0.308084	0.00144634	0.0265622	Tmem147	chr7	-	30727701	30729540	1112	protein_coding	transmembrane_protein_147
ENSMUSG00000034157	788.264	869.133	959.191	671.34	626.668	692.22	-0.366315	0.00145993	0.0267786	Cipc	chr12	+	86947043	86965362	4863	protein_coding	CLOCK_interacting_protein_circadian
ENSMUSG00000049881	170.483	175.64	194.889	233.826	285.517	259.314	0.4605	0.00146336	0.0268035	2810025M15Rik	chr1	+	157412352	157420236	1410	transcribed_processed_pseudogene	RIKEN_cDNA_2810025M15_gene
ENSMUSG00000031109	291.754	326.35	308.433	391.788	442.971	412.546	0.393806	0.0014649	0.0268035	Enox2	chrX	-	49009707	49288259	4356	protein_coding	ecto-NOX_disulfide-thiol_exchanger_2
ENSMUSG00000041308	516.721	281.024	440.618	280.591	227.784	260.386	-0.557046	0.00147051	0.026873	Sntb2	chr8	+	106935750	107014192	4423	protein_coding	syntrophin_basic_2
ENSMUSG00000036502	71.181	15.8642	43.2144	19.7453	4.19878	3.21464	-0.653238	0.00148325	0.0270726	Tmem255a	chrX	-	38196573	38252439	4490	protein_coding	transmembrane_protein_255A
ENSMUSG00000039063	1078.26	1430.05	1243.05	1672.12	1651.17	1626.61	0.371117	0.00148508	0.0270726	Echdc3	chr2	-	6188465	6213033	2685	protein_coding	enoyl_Coenzyme_A_hydratase_domain_containing_3
ENSMUSG00000024317	309.33	308.219	267.76	381.396	421.977	398.616	0.402898	0.00149466	0.0272137	Rnf138	chr18	+	21001341	21028223	3110	protein_coding	ring_finger_protein_138
ENSMUSG00000030019	898.111	786.413	812.601	664.066	650.811	626.855	-0.340932	0.0014971	0.0272247	Fbxl14	chr6	+	119479668	119482630	2963	protein_coding	F-box_and_leucine-rich_repeat_protein_14
ENSMUSG00000047904	119.514	94.0522	117.781	42.6083	32.5405	84.6523	-0.674753	0.00150822	0.0273742	Sstr2	chr11	+	113619342	113626028	2143	protein_coding	somatostatin_receptor_2
ENSMUSG00000046808	217.058	162.042	232.172	119.511	119.665	150.017	-0.538948	0.001509	0.0273742	Atp10d	chr5	+	72203329	72298775	7848	polymorphic_pseudogene	ATPase_class_V_type_10D
ENSMUSG00000022371	4584.58	4099.77	4423.13	3511.55	3547.97	3651.83	-0.279552	0.00151109	0.0273786	Col14a1	chr15	+	55307750	55520803	7013	protein_coding	collagen_type_XIV_alpha_1
ENSMUSG00000040133	57.9993	62.3238	55.9246	30.1376	30.4412	30.0033	-0.653129	0.00152138	0.0275199	Gpr176	chr2	-	118277110	118373419	3899	protein_coding	G_protein-coupled_receptor_176
ENSMUSG00000022883	228.482	207.368	194.041	280.591	308.61	291.461	0.432266	0.0015226	0.0275199	Robo1	chr16	+	72663149	73046095	7563	protein_coding	roundabout_homolog_1_(Drosophila)
ENSMUSG00000035407	56.2418	43.0601	33.0463	20.7845	19.9442	15.0017	-0.695828	0.00154959	0.0279737	Kank4	chr4	-	98754898	98817537	4795	protein_coding	KN_motif_and_ankyrin_repeat_domains_4
ENSMUSG00000042507	586.145	567.713	621.949	422.965	467.114	469.338	-0.359297	0.00155215	0.0279859	Elmsan1	chr12	-	84149176	84218881	7611	protein_coding	ELM2_and_Myb/SANT-like_domain_containing_1
ENSMUSG00000030654	4312.16	4227.82	4444.31	6073.24	5399.63	4951.62	0.320323	0.00155775	0.0280438	Arl6ip1	chr7	-	118118891	118129662	2482	protein_coding	ADP-ribosylation_factor-like_6_interacting_protein_1
ENSMUSG00000024621	4389.5	4562.1	4101.98	3392.03	3647.69	3589.68	-0.283513	0.00156125	0.0280438	Csf1r	chr18	+	61105572	61132149	4885	protein_coding	colony_stimulating_factor_1_receptor
ENSMUSG00000021728	298.784	262.893	192.347	160.041	171.1	154.303	-0.526259	0.00156155	0.0280438	Emb	chr13	+	117220625	117274098	2253	protein_coding	embigin
ENSMUSG00000026189	2153.88	2981.34	2413.23	2990.89	3804.09	3676.48	0.424518	0.00156292	0.0280438	Pecr	chr1	-	72259167	72284314	1516	protein_coding	peroxisomal_trans-2-enoyl-CoA_reductase
ENSMUSG00000009350	14.0604	10.1984	38.9777	4.15691	5.24847	1.07155	-0.625563	0.00156911	0.0281208	Mpo	chr11	+	87793581	87804413	3424	protein_coding	myeloperoxidase
ENSMUSG00000070419	64.1508	43.0601	44.9091	25.9807	26.2424	12.8586	-0.693561	0.00157538	0.0281991	Cyp3a57	chr5	+	145345279	145390926	1994	protein_coding	cytochrome_P450_family_3_subfamily_a_polypeptide_57
ENSMUSG00000033102	349.754	420.402	352.494	474.926	495.456	559.348	0.407176	0.00157991	0.0282461	Cdc14b	chr13	-	64192545	64274973	6083	protein_coding	CDC14_cell_division_cycle_14B
ENSMUSG00000033191	497.388	581.311	758.371	823.067	829.259	1064.05	0.484936	0.00159125	0.0284146	Tie1	chr4	-	118471191	118490061	4917	protein_coding	tyrosine_kinase_with_immunoglobulin-like_and_EGF-like_domains_1
ENSMUSG00000021900	1220.62	1359.79	1327.79	1805.14	1518.91	1674.83	0.333984	0.00160057	0.0285467	Btd	chr14	+	31641028	31668579	2353	protein_coding	biotinidase
ENSMUSG00000031273	154.665	99.718	116.933	78.9812	74.5283	63.2213	-0.595005	0.0016059	0.0286074	Col4a6	chrX	-	141165403	141474076	7973	protein_coding	collagen_type_IV_alpha_6
ENSMUSG00000026271	174.877	193.77	144.048	92.4911	113.367	118.942	-0.537036	0.00161793	0.0287872	Gpr35	chr1	+	92950865	92986391	4839	protein_coding	G_protein-coupled_receptor_35
ENSMUSG00000020629	2940.39	3221.57	3241.08	3611.31	4121.1	4008.66	0.304464	0.0016205	0.0287983	Adi1	chr12	+	28675231	28682175	1886	protein_coding	acireductone_dioxygenase_1
ENSMUSG00000041571	5336.82	5438.03	5802.6	7704.82	7684.82	6115.32	0.350128	0.0016365	0.0290479	Sepw1	chr7	-	15917208	15922402	736	protein_coding	selenoprotein_W_muscle_1
ENSMUSG00000062480	2536.15	2894.09	2790.3	3477.25	3221.51	3544.68	0.302042	0.00165621	0.0293626	Acat3	chr17	-	12923833	12940402	2345	protein_coding	acetyl-Coenzyme_A_acetyltransferase_3
ENSMUSG00000022217	364.693	482.726	437.229	575.731	589.929	576.493	0.401592	0.00165857	0.0293693	Emc9	chr14	-	55581516	55585302	2465	protein_coding	ER_membrane_protein_complex_subunit_9
ENSMUSG00000038335	300.542	281.024	395.709	206.806	243.529	210.023	-0.487229	0.00166766	0.029453	Tsr1	chr11	+	74898071	74909342	3837	protein_coding	TSR1_20S_rRNA_accumulation
ENSMUSG00000029135	900.747	803.41	975.291	620.418	636.115	749.012	-0.384549	0.00166799	0.029453	Fosl2	chr5	+	32135801	32157842	9680	protein_coding	fos-like_antigen_2
ENSMUSG00000022270	974.565	1311.07	1091.38	1678.35	1428.63	1463.73	0.398644	0.00166925	0.029453	Fam134b	chr15	+	25843264	25973687	3346	protein_coding	family_with_sequence_similarity_134_member_B
ENSMUSG00000076586	4.39389	27.1958	64.398	7.27458	3.14908	2.14309	-0.594839	0.00167437	0.0294538	Igkv8-21	chr6	-	70314895	70315472	382	IG_V_gene	immunoglobulin_kappa_variable_8-21
ENSMUSG00000025429	208.27	179.039	149.132	234.865	338.002	259.314	0.525173	0.00167704	0.0294538	Pstpip2	chr18	+	77794545	77882007	1395	protein_coding	proline-serine-threonine_phosphatase-interacting_protein_2
ENSMUSG00000014846	167.847	109.916	147.438	101.844	79.7768	63.2213	-0.601331	0.00167805	0.0294538	Tppp3	chr8	-	105467493	105471526	1848	protein_coding	tubulin_polymerization-promoting_protein_family_member_3
ENSMUSG00000021032	69.4234	39.6606	66.94	20.7845	20.9939	36.4326	-0.68606	0.00168156	0.0294538	Ngb	chr12	-	87097531	87102539	1723	protein_coding	neuroglobin
ENSMUSG00000041559	3294.54	1524.1	1669.26	1095.34	926.881	772.586	-0.689643	0.00168167	0.0294538	Fmod	chr1	+	134037254	134048277	3306	protein_coding	fibromodulin
ENSMUSG00000039804	514.085	475.927	518.573	399.063	336.952	393.258	-0.384196	0.00168219	0.0294538	Ncoa5	chr2	-	165000357	165034867	4383	protein_coding	nuclear_receptor_coactivator_5
ENSMUSG00000017309	295.269	384.141	449.091	536.241	504.903	605.424	0.472565	0.00168319	0.0294538	Cd300lg	chr11	+	102041509	102055620	2737	protein_coding	CD300_antigen_like_family_member_G
ENSMUSG00000091721	78.2112	62.3238	56.7719	123.668	119.665	93.2246	0.589183	0.00169585	0.0296405	Gimd1	chr3	+	132630191	132645350	1413	protein_coding	GIMAP_family_P-loop_NTPase_domain_containing_1
ENSMUSG00000054452	12403.1	12952	13454.9	14915	16930.5	15748.5	0.281743	0.00169831	0.0296484	Aes	chr10	+	81559494	81566362	1411	protein_coding	amino-terminal_enhancer_of_split
ENSMUSG00000079465	76.4537	72.5222	80.4975	46.7652	33.5902	46.0765	-0.62222	0.00170422	0.0296855	Col4a3	chr1	+	82586921	82722059	9967	protein_coding	collagen_type_IV_alpha_3
ENSMUSG00000039114	6111.02	7283.95	7003.28	7799.39	9108.2	9486.41	0.347075	0.00170472	0.0296855	Nrn1	chr13	-	36725625	36734477	1766	protein_coding	neuritin_1
ENSMUSG00000040774	1079.14	1057.24	1094.77	1395.68	1329.96	1281.57	0.295598	0.00170643	0.0296855	Cept1	chr3	-	106502260	106547802	3116	protein_coding	choline/ethanolaminephosphotransferase_1
ENSMUSG00000026103	800.567	574.512	774.471	536.241	508.052	501.484	-0.427375	0.00171044	0.0297205	Gls	chr1	-	52163448	52233232	15057	protein_coding	glutaminase
ENSMUSG00000014303	652.053	349.013	480.443	365.808	280.269	261.458	-0.562481	0.00172076	0.0298647	Glis2	chr16	+	4594713	4624924	4373	protein_coding	GLIS_family_zinc_finger_2
ENSMUSG00000006057	3918.47	3818.75	4175.7	4551.81	5007.04	5228.08	0.296659	0.00172919	0.029976	Atp5g1	chr11	-	96068852	96075670	4912	protein_coding	ATP_synthase_H+_transporting_mitochondrial_F0_complex_subunit_C1_(subunit_9)
ENSMUSG00000024810	286.482	138.245	255.05	139.256	112.317	135.015	-0.607448	0.00173609	0.0300605	Il33	chr19	+	29925114	29960718	2886	protein_coding	interleukin_33
ENSMUSG00000037316	246.058	215.3	232.172	289.944	315.958	398.616	0.464137	0.00174438	0.0301689	Bag4	chr8	-	25764538	25785209	4798	protein_coding	BCL2-associated_athanogene_4
ENSMUSG00000027397	1329.59	1601.15	1631.98	1189.91	981.465	1226.92	-0.388448	0.00175089	0.0302462	Slc20a1	chr2	+	129198764	129211616	5580	protein_coding	solute_carrier_family_20_member_1
ENSMUSG00000047728	1568.62	2010.22	2123.44	2984.66	2540.26	2331.69	0.416304	0.00175653	0.0303082	BC025446	chr15	+	75216376	75222661	1557	protein_coding	cDNA_sequence_BC025446
ENSMUSG00000026692	182.786	217.567	188.957	241.101	288.666	337.537	0.48139	0.00176821	0.0304744	Fmo4	chr1	-	162793188	162813972	3707	protein_coding	flavin_containing_monooxygenase_4
ENSMUSG00000057719	150.271	72.5222	90.6656	60.2751	47.2363	52.5058	-0.65135	0.0017866	0.0307556	Sh3rf2	chr18	+	42053667	42158960	5307	protein_coding	SH3_domain_containing_ring_finger_2
ENSMUSG00000036199	2444.76	2743.38	2675.91	3316.17	3345.38	3069.98	0.293238	0.00179085	0.030775	Ndufa13	chr8	-	69894188	69902558	1243	protein_coding	NADH_dehydrogenase_(ubiquinone)_1_alpha_subcomplex_13
ENSMUSG00000037185	184.543	100.851	94.9023	56.1182	76.6277	65.3644	-0.643851	0.00179187	0.030775	Krt80	chr15	-	101349571	101370125	1774	protein_coding	keratin_80
ENSMUSG00000001761	1395.5	1075.37	1135.44	1004.93	830.309	771.514	-0.420549	0.00179537	0.0307751	Smo	chr6	+	29735503	29761365	5621	protein_coding	smoothened_frizzled_class_receptor
ENSMUSG00000030047	723.234	837.405	572.803	532.084	519.599	437.191	-0.453702	0.00179603	0.0307751	Arhgap25	chr6	-	87458545	87533259	4434	protein_coding	Rho_GTPase_activating_protein_25
ENSMUSG00000029050	1543.13	1588.69	1861.61	1211.74	1258.58	1383.37	-0.34878	0.00180831	0.0309499	Ski	chr4	-	155154075	155222592	5562	protein_coding	ski_sarcoma_viral_oncogene_homolog_(avian)
ENSMUSG00000106069	94.908	64.5901	108.46	184.982	164.802	118.942	0.599067	0.00181191	0.0309757	Gm6135	chr3	-	133789515	133791504	372	lincRNA	prediticted_gene_6135
ENSMUSG00000028124	4449.25	4747.94	4452.78	5289.66	5632.66	5577.4	0.263431	0.0018193	0.0310662	Gclm	chr3	+	122245557	122270732	6291	protein_coding	glutamate-cysteine_ligase_modifier_subunit
ENSMUSG00000026090	133.574	56.658	147.438	70.6674	34.6399	43.9334	-0.682248	0.00182656	0.0311194	2010300C02Rik	chr1	-	37611677	37720085	5075	protein_coding	RIKEN_cDNA_2010300C02_gene
ENSMUSG00000033628	424.45	495.191	410.114	599.634	564.736	591.494	0.372052	0.00182661	0.0311194	Pik3c3	chr18	+	30272747	30348126	4466	protein_coding	phosphoinositide-3-kinase_class_3
ENSMUSG00000022947	337.451	380.742	305.043	626.653	508.052	393.258	0.493421	0.00183175	0.0311713	Cbr3	chr16	+	93683215	93690990	1170	protein_coding	carbonyl_reductase_3
ENSMUSG00000019230	49.2116	49.859	40.6724	20.7845	27.2921	13.9301	-0.679944	0.00183876	0.0312547	Lhx9	chr1	-	138825186	138848577	9494	protein_coding	LIM_homeobox_protein_9
ENSMUSG00000008976	650.296	642.501	650.759	770.067	840.806	854.023	0.322687	0.00184519	0.0313281	Gabpa	chr16	+	84834925	84863779	5687	protein_coding	GA_repeat_binding_protein_alpha
ENSMUSG00000004100	741.688	495.191	701.599	488.436	453.468	371.827	-0.482755	0.00184948	0.0313651	Ppan	chr9	+	20888175	20892178	2504	protein_coding	peter_pan_homolog_(Drosophila)
ENSMUSG00000096802	7.909	18.1305	11.8628	34.2945	27.2921	38.5757	0.689879	0.00186193	0.0315402	Gm15433	chr1	+	84963669	84964559	891	processed_pseudogene	predicted_pseudogene_15433
ENSMUSG00000048807	140.604	152.977	126.254	99.7657	81.8762	85.7238	-0.53036	0.00186849	0.0316151	Slc35e4	chr11	-	3907021	3914664	3063	protein_coding	solute_carrier_family_35_member_E4
ENSMUSG00000046719	49.2116	41.9269	33.8937	15.5884	13.646	23.574	-0.684877	0.00187319	0.0316586	Nxph3	chr11	-	95509845	95514570	2099	protein_coding	neurexophilin_3
ENSMUSG00000060802	39959.8	39537.1	46088.6	57853.7	52142.5	49193.7	0.322225	0.00187845	0.0317113	B2m	chr2	+	122147686	122153083	860	protein_coding	beta-2_microglobulin
ENSMUSG00000027199	590.539	611.906	618.56	803.322	754.731	747.94	0.321203	0.00188803	0.0318369	Gatm	chr2	-	122594467	122611303	3001	protein_coding	glycine_amidinotransferase_(L-arginine:glycine_amidinotransferase)
ENSMUSG00000041028	7806.18	7926.45	7843.85	9232.49	9184.83	9563.56	0.239396	0.00191479	0.0322514	Ghitm	chr14	-	37120444	37135322	3081	protein_coding	growth_hormone_inducible_transmembrane_protein
ENSMUSG00000038954	101.938	106.517	88.9709	160.041	149.057	142.516	0.507426	0.00194542	0.0327302	Supt3	chr17	+	44777152	45119290	4121	protein_coding	suppressor_of_Ty_3
ENSMUSG00000017453	2275.16	3041.4	2900.45	3125.99	3935.31	4675.16	0.451166	0.00195695	0.0328624	Pipox	chr11	-	77880615	77894096	2470	protein_coding	pipecolic_acid_oxidase
ENSMUSG00000067235	40220.8	56748.6	54025.7	62844.1	65999.6	81700.1	0.427482	0.0019577	0.0328624	H2-Q10	chr17	+	35470089	35474563	4348	protein_coding	histocompatibility_2_Q_region_locus_10
ENSMUSG00000035047	124.786	140.512	125.407	90.4127	67.1805	86.7953	-0.543085	0.00196153	0.0328895	Kri1	chr9	-	21273457	21287969	4182	protein_coding	KRI1_homolog
ENSMUSG00000033898	6311.38	7226.16	7792.16	8757.56	9075.66	8989.21	0.312451	0.00197208	0.033029	Cfhr2	chr1	-	139804167	139858702	1933	protein_coding	complement_factor_H-related_2
ENSMUSG00000024975	943.807	1076.5	906.656	1231.48	1314.22	1195.85	0.333242	0.00200405	0.0335266	Pdcd4	chr19	+	53892231	53929861	2556	protein_coding	programmed_cell_death_4
ENSMUSG00000033389	210.907	123.514	166.079	124.707	83.9756	70.7221	-0.611447	0.00200738	0.0335445	Arhgap44	chr11	-	65002039	65162961	5819	protein_coding	Rho_GTPase_activating_protein_44
ENSMUSG00000048537	762.779	623.238	700.752	494.672	446.12	583.993	-0.409107	0.00201169	0.0335787	Phldb1	chr9	-	44686304	44735198	7179	protein_coding	pleckstrin_homology-like_domain_family_B_member_1
ENSMUSG00000014313	4972.13	5521.89	5095.07	6144.95	6420.98	6331.77	0.266926	0.00202518	0.0337659	Cox6c	chr15	-	35925886	35938246	3567	protein_coding	cytochrome_c_oxidase_subunit_VIc
ENSMUSG00000006373	28983	34073	31419.4	40748.1	36254.4	41473.2	0.30901	0.00203349	0.0338663	Pgrmc1	chrX	+	36598206	36606079	1857	protein_coding	progesterone_receptor_membrane_component_1
ENSMUSG00000040413	717.961	798.877	803.28	933.225	977.266	1045.83	0.328451	0.0020467	0.0340481	Timd2	chr11	-	46668960	46707061	3473	protein_coding	T_cell_immunoglobulin_and_mucin_domain_containing_2
ENSMUSG00000026203	1491.29	1377.92	1448.11	1846.71	1881.05	1659.83	0.30262	0.00204957	0.0340578	Dnajb2	chr1	+	75236406	75245692	4249	protein_coding	DnaJ_heat_shock_protein_family_(Hsp40)_member_B2
ENSMUSG00000025903	1834.89	1985.3	1979.39	2271.75	2372.31	2477.42	0.283093	0.00205839	0.0341661	Lypla1	chr1	+	4807788	4848410	7145	protein_coding	lysophospholipase_1
ENSMUSG00000060671	434.116	388.674	370.288	301.376	284.467	301.105	-0.389821	0.00206192	0.0341865	Atp8b2	chr3	-	89939481	89963508	8561	protein_coding	ATPase_class_I_type_8B_member_2
ENSMUSG00000045545	26.3633	16.9974	29.657	3.11768	7.34786	10.7155	-0.665052	0.00209818	0.0346792	Krt14	chr11	-	100203162	100207548	1758	protein_coding	keratin_14
ENSMUSG00000038679	151.15	155.243	110.154	76.9027	86.075	93.2246	-0.552827	0.00209856	0.0346792	Trps1	chr15	-	50654752	50890463	13380	protein_coding	trichorhinophalangeal_syndrome_I_(human)
ENSMUSG00000040247	214.422	183.572	163.537	114.315	144.858	93.2246	-0.540466	0.00209865	0.0346792	Tbc1d10c	chr19	-	4184358	4191047	1758	protein_coding	TBC1_domain_family_member_10c
ENSMUSG00000040374	1307.62	1444.78	1399.81	1676.27	2010.17	1656.61	0.339934	0.00210297	0.0347118	Pex2	chr3	-	5560188	5576239	2270	protein_coding	peroxisomal_biogenesis_factor_2
ENSMUSG00000051225	761.022	601.708	570.261	560.143	331.704	279.674	-0.5638	0.00212153	0.0349793	Fam83a	chr15	+	57985419	58011009	3171	protein_coding	family_with_sequence_similarity_83_member_A
ENSMUSG00000055805	940.292	691.227	599.918	459.338	577.332	474.696	-0.480405	0.00214147	0.035269	Fmnl1	chr11	+	103171107	103198901	4868	protein_coding	formin-like_1
ENSMUSG00000005836	739.052	691.227	605.85	572.614	469.214	450.05	-0.404262	0.00214693	0.0353104	Gata6	chr18	+	11052510	11085635	3194	protein_coding	GATA_binding_protein_6
ENSMUSG00000031570	694.234	771.681	605.85	901.009	1046.55	844.379	0.392503	0.00214875	0.0353104	Plpp5	chr8	+	25720061	25724887	2546	protein_coding	phospholipid_phosphatase_5
ENSMUSG00000021068	398.965	302.554	295.722	192.257	236.181	248.599	-0.47893	0.00215981	0.0354168	Nin	chr12	-	70011435	70111925	10345	protein_coding	ninein
ENSMUSG00000027204	652.932	548.449	663.469	517.535	430.375	431.834	-0.395534	0.00216	0.0354168	Fbn1	chr2	-	125300594	125507993	12128	protein_coding	fibrillin_1
ENSMUSG00000046879	1024.65	1158.09	1350.66	1820.72	1493.72	1474.45	0.397149	0.0021709	0.0355562	Irgm1	chr11	-	48861968	48871683	5810	protein_coding	immunity-related_GTPase_family_M_member_1
ENSMUSG00000002475	770.688	837.405	908.351	1097.42	1000.36	1140.13	0.339192	0.00218235	0.0356884	Abhd3	chr18	-	10644411	10706771	1962	protein_coding	abhydrolase_domain_containing_3
ENSMUSG00000021669	1146.81	1138.83	1198.14	1346.84	1466.42	1530.17	0.301309	0.00218377	0.0356884	Col4a3bp	chr13	+	96542618	96640167	5390	protein_coding	collagen_type_IV_alpha_3_(Goodpasture_antigen)_binding_protein
ENSMUSG00000058672	4646.98	3606.85	3822.36	3530.25	2468.88	1888.07	-0.510161	0.00218964	0.0357448	Tubb2a	chr13	-	34074301	34078008	1584	protein_coding	tubulin_beta_2A_class_IIA
ENSMUSG00000042770	7040.77	8401.24	7860.79	9303.15	9765.31	9813.23	0.29449	0.00219649	0.0357894	Hebp1	chr6	-	135137522	135198022	3711	protein_coding	heme_binding_protein_1
ENSMUSG00000023913	797.93	797.744	666.858	595.477	569.984	380.399	-0.471677	0.0021972	0.0357894	Pla2g7	chr17	+	43568098	43612201	2905	protein_coding	phospholipase_A2_group_VII_(platelet-activating_factor_acetylhydrolase_plasma)
ENSMUSG00000037025	965.777	1277.07	909.198	712.909	841.855	698.649	-0.428377	0.00221878	0.0361014	Foxa2	chr2	-	148042877	148046969	2370	protein_coding	forkhead_box_A2
ENSMUSG00000015843	103.696	124.648	130.491	189.139	167.951	176.805	0.486961	0.00223098	0.0362598	Rxrg	chr1	+	167598384	167639623	2297	protein_coding	retinoid_X_receptor_gamma
ENSMUSG00000029094	209.149	150.71	170.316	124.707	113.367	108.226	-0.511407	0.0022334	0.0362598	Afap1	chr5	+	35893319	36003923	12650	protein_coding	actin_filament_associated_protein_1
ENSMUSG00000005220	7.909	4.53264	2.54203	11.4315	19.9442	33.218	0.634225	0.00223611	0.0362639	Corin	chr5	-	72300025	72504473	5400	protein_coding	corin
ENSMUSG00000002324	36.0299	38.5274	47.4512	57.1574	78.7271	96.4393	0.630631	0.00223935	0.0362639	Rec8	chr14	+	55618037	55625395	2748	protein_coding	REC8_meiotic_recombination_protein
ENSMUSG00000085772	9.66656	5.6658	12.7101	35.3337	24.143	23.574	0.673932	0.00224099	0.0362639	D630024D03Rik	chr11	-	31790113	31824524	1567	lincRNA	RIKEN_cDNA_D630024D03_gene
ENSMUSG00000039382	176.634	194.903	169.468	283.709	217.287	281.817	0.463091	0.00225186	0.0363556	Wdr45	chrX	+	7714333	7728206	3310	protein_coding	WD_repeat_domain_45
ENSMUSG00000052212	70.3022	72.5222	38.1304	19.7453	38.8387	15.0017	-0.676138	0.00225266	0.0363556	Cd177	chr7	-	24743983	24760311	2840	protein_coding	CD177_antigen
ENSMUSG00000020917	4203.19	4176.83	3746.95	4484.26	8095.25	5473.46	0.48664	0.00225518	0.0363556	Acly	chr11	-	100476353	100528000	5279	protein_coding	ATP_citrate_lyase
ENSMUSG00000014791	386.662	404.538	377.067	596.516	479.711	491.84	0.387442	0.00225645	0.0363556	Elmo3	chr8	+	105305601	105310623	3060	protein_coding	engulfment_and_cell_motility_3
ENSMUSG00000056050	1921.89	2508.81	2186.99	2699.91	2833.13	3147.13	0.361691	0.00225948	0.0363649	Mia3	chr1	-	183326725	183369553	4431	protein_coding	melanoma_inhibitory_activity_3
ENSMUSG00000038725	1325.2	584.71	1332.87	441.671	350.598	552.918	-0.675264	0.00226611	0.0364321	Pkhd1l1	chr15	+	44457553	44597143	12754	protein_coding	polycystic_kidney_and_hepatic_disease_1-like_1
ENSMUSG00000041642	585.266	550.715	471.122	328.396	416.729	414.689	-0.419548	0.00227144	0.0364648	Kif21b	chr1	+	136131389	136177998	12184	protein_coding	kinesin_family_member_21B
ENSMUSG00000039616	974.565	981.316	1021.05	1638.86	1327.86	1114.41	0.408921	0.00227306	0.0364648	Mocos	chr18	+	24653691	24701556	2884	protein_coding	molybdenum_cofactor_sulfurase
ENSMUSG00000038975	831.324	704.825	798.196	1005.97	965.719	999.754	0.325163	0.00231108	0.0369897	Rabggtb	chr3	-	153907287	153913009	2421	protein_coding	Rab_geranylgeranyl_transferase_b_subunit
ENSMUSG00000023952	1220.62	1306.53	1299.82	1502.72	1702.61	1559.1	0.299913	0.00231302	0.0369897	Gtpbp2	chr17	+	46161032	46169370	5305	protein_coding	GTP_binding_protein_2
ENSMUSG00000025366	1925.4	1779.06	1576.9	1445.56	1400.29	1239.78	-0.344275	0.00231326	0.0369897	Esyt1	chr10	-	128510248	128525859	3687	protein_coding	extended_synaptotagmin-like_protein_1
ENSMUSG00000000317	108.09	115.582	136.422	173.551	173.2	188.592	0.483729	0.00231732	0.0370148	Bcl6b	chr11	-	70224128	70229798	3719	protein_coding	B_cell_CLL/lymphoma_6_member_B
ENSMUSG00000033781	819.021	838.538	811.754	1116.13	1020.3	971.894	0.313477	0.00233249	0.0372171	Asb13	chr13	+	3634032	3651774	3347	protein_coding	ankyrin_repeat_and_SOCS_box-containing_13
ENSMUSG00000041737	30.7572	24.9295	35.5884	14.5492	12.5963	5.35774	-0.672672	0.0023508	0.0374689	Tmem45b	chr9	-	31426199	31464238	1572	protein_coding	transmembrane_protein_45b
ENSMUSG00000046178	65.0296	27.1958	63.5507	25.9807	18.8945	20.3594	-0.672442	0.00235689	0.0375256	Nxph1	chr6	+	8948431	9249032	4753	protein_coding	neurexophilin_1
ENSMUSG00000030249	578.236	836.272	709.225	1010.13	865.998	1103.69	0.432955	0.00236149	0.0375586	Abcc9	chr6	-	142587862	142702315	8373	protein_coding	ATP-binding_cassette_sub-family_C_(CFTR/MRP)_member_9
ENSMUSG00000001700	568.569	641.368	545.688	683.811	882.793	786.516	0.385852	0.00236788	0.03762	Gramd3	chr18	+	56432132	56503792	2605	protein_coding	GRAM_domain_containing_3
ENSMUSG00000096768	391.935	387.54	155.911	135.099	198.392	157.517	-0.629041	0.00237725	0.0377283	Erdr1	chrY	+	90784738	90816464	1124	protein_coding	erythroid_differentiation_regulator_1
ENSMUSG00000026822	12296.7	12835.3	13712.5	8780.42	5506.7	3628.26	-0.661263	0.00239258	0.037931	Lcn2	chr2	-	32384633	32388252	2623	protein_coding	lipocalin_2
ENSMUSG00000105260	11.4241	18.1305	11.8628	32.216	36.7393	31.0749	0.671879	0.00240587	0.0381012	Gm42434	chr3	-	41477577	41482391	720	lincRNA	predicted_gene_42434
ENSMUSG00000062110	217.937	208.501	230.477	287.866	307.561	297.89	0.398614	0.00241254	0.038166	Scfd2	chr5	-	74204816	74531759	8196	protein_coding	Sec1_family_domain_containing_2
ENSMUSG00000049751	5598.69	5311.12	5073.88	6492.05	6955.28	6143.18	0.280223	0.0024255	0.0383302	Rpl36al	chr12	-	69182731	69184083	1353	protein_coding	ribosomal_protein_L36A-like
ENSMUSG00000031173	5868.48	6098.66	6649.94	7113.5	7747.8	8404.15	0.304073	0.00244647	0.0385865	Otc	chrX	+	10252305	10321024	4241	protein_coding	ornithine_transcarbamylase
ENSMUSG00000061589	825.172	828.339	1049.86	501.946	582.581	774.729	-0.465428	0.00244941	0.0385865	Dot1l	chr10	+	80755206	80795461	8705	protein_coding	DOT1-like_histone_H3_methyltransferase_(S._cerevisiae)
ENSMUSG00000052566	542.206	569.979	626.186	696.282	775.725	773.657	0.342959	0.00244983	0.0385865	Hook2	chr8	+	84990595	85003364	2617	protein_coding	hook_microtubule_tethering_protein_2
ENSMUSG00000035916	116.877	62.3238	66.0927	55.079	31.4908	25.7171	-0.660955	0.00245212	0.0385865	Ptprq	chr10	-	107517049	107720051	7393	protein_coding	protein_tyrosine_phosphatase_receptor_type_Q
ENSMUSG00000018425	696.871	804.543	685.5	899.97	979.365	919.388	0.333987	0.00245796	0.0386374	Dhx40	chr11	-	86768846	86807746	4233	protein_coding	DEAH_(Asp-Glu-Ala-His)_box_polypeptide_40
ENSMUSG00000037904	149.392	141.645	185.568	96.648	107.069	108.226	-0.508361	0.00246844	0.038741	Ankrd9	chr12	-	110975353	110979040	3160	protein_coding	ankyrin_repeat_domain_9
ENSMUSG00000002763	2869.21	3537.72	3781.69	4691.07	4407.67	4183.32	0.353873	0.00246978	0.038741	Pex6	chr17	+	46711463	46725541	3796	protein_coding	peroxisomal_biogenesis_factor_6
ENSMUSG00000030494	640.629	522.386	628.728	458.299	394.685	476.839	-0.391443	0.00249781	0.0391353	Rhpn2	chr7	+	35334170	35392289	6304	protein_coding	rhophilin_Rho_GTPase_binding_protein_2
ENSMUSG00000022043	745.204	632.303	626.186	549.751	497.555	460.765	-0.375235	0.00250019	0.0391353	Trim35	chr14	+	66297031	66311424	4045	protein_coding	tripartite_motif-containing_35
ENSMUSG00000031832	156.422	166.574	199.973	125.746	112.317	110.369	-0.492513	0.00252177	0.0394316	Taf1c	chr8	-	119597975	119605222	3386	protein_coding	TATA_box_binding_protein_(Tbp)-associated_factor_RNA_polymerase_I_C
ENSMUSG00000057969	288.239	231.164	246.577	197.453	145.908	180.02	-0.471306	0.00253212	0.0394982	Sema3b	chr9	-	107597674	107609229	4777	protein_coding	sema_domain_immunoglobulin_domain_(Ig)_short_basic_domain_secreted_(semaphorin)_3B
ENSMUSG00000074682	167.847	99.718	117.781	83.1381	74.5283	68.579	-0.579274	0.0025325	0.0394982	Zcchc3	chr2	-	152411955	152415027	3073	protein_coding	zinc_finger_CCHC_domain_containing_3
ENSMUSG00000028041	567.69	440.799	503.321	391.788	382.089	272.173	-0.459667	0.00253402	0.0394982	Adam15	chr3	-	89338542	89349996	6145	protein_coding	a_disintegrin_and_metallopeptidase_domain_15_(metargidin)
ENSMUSG00000038147	1241.71	1320.13	1067.65	970.637	956.272	881.884	-0.342706	0.00254874	0.0396859	Cd84	chr1	+	171839697	171890718	6272	protein_coding	CD84_antigen
ENSMUSG00000035357	220.573	258.36	230.477	186.022	146.957	159.661	-0.453823	0.00256777	0.0399403	Pdzrn3	chr6	-	101149609	101377897	7256	protein_coding	PDZ_domain_containing_RING_finger_3
ENSMUSG00000089810	60.6357	61.1906	49.1458	78.9812	108.119	102.869	0.576135	0.00257588	0.0400005	Gm16536	chr9	-	45856769	45858357	1589	antisense	predicted_gene_16536
ENSMUSG00000074364	1016.75	728.621	789.723	680.693	490.208	602.21	-0.449461	0.00257702	0.0400005	Ehd2	chr7	-	15946977	15967567	5100	protein_coding	EH-domain_containing_2
ENSMUSG00000021508	885.808	813.608	684.652	633.928	608.823	514.343	-0.396678	0.00258625	0.0401018	Cxcl14	chr13	-	56288647	56296551	1823	protein_coding	chemokine_(C-X-C_motif)_ligand_14
ENSMUSG00000036136	87.8778	80.4543	68.6347	48.8436	32.5405	49.2912	-0.60652	0.00260667	0.0403592	Fam110c	chr12	+	31073968	31079937	2667	protein_coding	family_with_sequence_similarity_110_member_C
ENSMUSG00000032050	3501.05	3714.5	3680.85	4116.38	4521.04	4660.16	0.27466	0.00260829	0.0403592	Rdx	chr9	+	52047150	52088737	4841	protein_coding	radixin
ENSMUSG00000020901	474.54	511.055	417.74	332.552	373.691	338.609	-0.384766	0.00261969	0.0404837	Pik3r5	chr11	+	68432121	68497849	5550	protein_coding	phosphoinositide-3-kinase_regulatory_subunit_5_p101
ENSMUSG00000030653	392.814	514.454	497.39	636.007	574.183	730.795	0.416554	0.0026218	0.0404837	Pde2a	chr7	+	101421691	101512829	4220	protein_coding	phosphodiesterase_2A_cGMP-stimulated
ENSMUSG00000050234	231.119	260.627	255.05	345.023	297.064	432.905	0.4553	0.00262764	0.0405317	Gja4	chr4	-	127311421	127314039	1685	protein_coding	gap_junction_protein_alpha_4
ENSMUSG00000028989	1511.5	350.146	869.373	276.434	244.579	273.245	-0.645053	0.00264299	0.0407262	Angptl7	chr4	-	148495183	148500460	2157	protein_coding	angiopoietin-like_7
ENSMUSG00000051669	1001.81	378.475	743.119	479.083	372.642	339.681	-0.599421	0.00265798	0.0409147	AU021092	chr16	-	5211828	5222299	1363	protein_coding	expressed_sequence_AU021092
ENSMUSG00000034006	1719.77	1680.48	1767.56	2109.63	2186.51	1996.29	0.271453	0.00270326	0.0415686	Pqlc1	chr18	+	80253292	80292725	6100	protein_coding	PQ_loop_repeat_containing_1
ENSMUSG00000079457	44.8177	62.3238	62.7033	98.7265	81.8762	110.369	0.579874	0.00271409	0.0416919	Gm7609	chr1	+	85199613	85213786	2496	transcribed_unprocessed_pseudogene	predicted_pseudogene_7609
ENSMUSG00000019874	639.75	772.815	638.896	448.946	537.444	541.131	-0.384718	0.00272831	0.0418671	Fabp7	chr10	+	57784881	57788450	1250	protein_coding	fatty_acid_binding_protein_7_brain
ENSMUSG00000037971	434.995	487.258	438.923	581.967	588.879	573.278	0.335074	0.00273403	0.0419115	1110032A03Rik	chr9	-	50762828	50775520	5293	protein_coding	RIKEN_cDNA_1110032A03_gene
ENSMUSG00000054716	636.235	620.971	655.843	788.773	902.738	761.87	0.334099	0.00274129	0.0419794	Zfp771	chr7	+	127244274	127254803	2009	protein_coding	zinc_finger_protein_771
ENSMUSG00000024074	2769.91	1783.59	2599.65	1835.27	1434.93	1730.55	-0.448968	0.00275385	0.0421282	Crim1	chr17	+	78200248	78376592	5995	protein_coding	cysteine_rich_transmembrane_BMP_regulator_1_(chordin_like)
ENSMUSG00000051147	349.754	379.608	353.342	430.24	501.754	493.983	0.365546	0.00277682	0.0424334	Nat2	chr8	+	67494867	67502580	1509	protein_coding	N-acetyltransferase_2_(arylamine_N-acetyltransferase)
ENSMUSG00000074030	424.45	375.076	389.777	294.101	299.163	307.534	-0.368314	0.00277952	0.0424334	Exoc8	chr8	-	124890300	124897705	7406	protein_coding	exocyst_complex_component_8
ENSMUSG00000015340	3308.6	3092.39	2841.14	2496.22	2612.69	2225.6	-0.313546	0.00282129	0.0430268	Cybb	chrX	-	9435252	9487771	5808	protein_coding	cytochrome_b-245_beta_polypeptide
ENSMUSG00000028557	3723.38	3177.38	3324.12	4426.06	4451.76	3928.29	0.306121	0.00282883	0.0430976	Rnf11	chr4	-	109451098	109484728	4263	protein_coding	ring_finger_protein_11
ENSMUSG00000009772	512.327	517.854	593.139	478.044	324.356	280.745	-0.488658	0.00284348	0.0432762	Nuak2	chr1	+	132316126	132333488	3920	protein_coding	NUAK_family_SNF1-like_kinase_2
ENSMUSG00000050390	1619.59	1470.84	1789.59	1982.84	2142.43	2025.22	0.3131	0.00284931	0.0433093	C77080	chr4	-	129219578	129261404	5770	protein_coding	expressed_sequence_C77080
ENSMUSG00000034854	448.177	588.11	459.259	345.023	367.393	378.256	-0.405199	0.00285423	0.0433093	Mfsd12	chr10	+	81357491	81366225	3971	protein_coding	major_facilitator_superfamily_domain_containing_12
ENSMUSG00000018500	36.0299	26.0627	30.5043	12.4707	14.6957	9.64393	-0.661411	0.0028544	0.0433093	Adora2b	chr11	+	62248984	62266453	1845	protein_coding	adenosine_A2b_receptor
ENSMUSG00000038244	760.143	579.044	613.476	514.417	396.785	493.983	-0.421143	0.00289	0.0438047	Mical2	chr7	+	112225856	112355194	11510	protein_coding	microtubule_associated_monooxygenase_calponin_and_LIM_domain_containing_2
ENSMUSG00000015950	779.476	721.822	660.927	589.241	566.835	466.123	-0.377085	0.00289814	0.0438832	Ncf1	chr5	-	134220053	134229625	3663	protein_coding	neutrophil_cytosolic_factor_1
ENSMUSG00000021794	18305.8	17406.5	15890.2	19152.9	23240.2	22891.5	0.318294	0.00290769	0.0439829	Glud1	chr14	+	34310727	34345144	4089	protein_coding	glutamate_dehydrogenase_1
ENSMUSG00000046785	471.904	390.94	416.892	319.042	308.61	333.251	-0.37776	0.00292521	0.0442028	Epm2aip1	chr9	+	111271929	111279093	7165	protein_coding	EPM2A_(laforin)_interacting_protein_1
ENSMUSG00000060063	278.573	261.76	147.438	126.786	155.355	128.586	-0.563134	0.00293672	0.0443316	Alox5ap	chr5	+	149264767	149288153	1420	protein_coding	arachidonate_5-lipoxygenase_activating_protein
ENSMUSG00000038323	364.693	366.01	322.837	412.573	548.99	478.982	0.404699	0.00294546	0.0444184	1700066M21Rik	chr1	+	57377620	57385423	3235	protein_coding	RIKEN_cDNA_1700066M21_gene
ENSMUSG00000097352	41.3026	57.7911	35.5884	14.5492	26.2424	18.2163	-0.654232	0.0029574	0.0445531	C920009B18Rik	chr10	+	22306702	22321765	6564	transcribed_unprocessed_pseudogene	RIKEN_cDNA__C920009B18_gene
ENSMUSG00000063727	268.027	145.044	249.966	144.452	109.168	144.659	-0.56246	0.00296199	0.0445771	Tnfrsf11b	chr15	-	54250619	54278484	2818	protein_coding	tumor_necrosis_factor_receptor_superfamily_member_11b_(osteoprotegerin)
ENSMUSG00000040918	1130.11	1487.84	1344.73	1702.25	1646.97	1796.99	0.349203	0.00298332	0.0448526	Slc19a2	chr1	+	164249046	164265385	3838	protein_coding	solute_carrier_family_19_(thiamine_transporter)_member_2
ENSMUSG00000002846	695.992	684.428	707.531	862.558	897.489	835.807	0.2969	0.00299953	0.0450091	Timmdc1	chr16	-	38498347	38522663	1784	protein_coding	translocase_of_inner_mitochondrial_membrane_domain_containing_1
ENSMUSG00000026678	854.172	940.522	1087.14	1355.15	1110.58	1375.87	0.376989	0.0029998	0.0450091	Rgs5	chr1	+	169655501	169695813	4546	protein_coding	regulator_of_G-protein_signaling_5
ENSMUSG00000020794	1196.02	1354.13	1278.64	1499.6	1595.54	1655.54	0.295302	0.00301594	0.0451818	Ube2g1	chr11	+	72607283	72686481	4579	protein_coding	ubiquitin-conjugating_enzyme_E2G_1
ENSMUSG00000040134	14122.8	19249	19044.9	24295	21850.4	23035.1	0.366434	0.0030174	0.0451818	Rdh7	chr10	-	127884028	127888817	1678	protein_coding	retinol_dehydrogenase_7
ENSMUSG00000026532	27.2421	10.1984	21.1836	4.15691	1.04969	7.50083	-0.601464	0.00302154	0.0451982	Spta1	chr1	+	174172776	174248450	9691	protein_coding	spectrin_alpha_erythrocytic_1
ENSMUSG00000031827	5034.52	5101.48	4296.87	3854.49	4074.92	3380.73	-0.328079	0.00302505	0.0452052	Cotl1	chr8	-	119809225	119840579	1628	protein_coding	coactosin-like_1_(Dictyostelium)
ENSMUSG00000026766	1461.41	1490.1	1439.63	1731.35	1810.72	1758.41	0.260645	0.00304284	0.0454253	Mmadhc	chr2	-	50279881	50296801	2012	protein_coding	methylmalonic_aciduria_(cobalamin_deficiency)_cblD_type_with_homocystinuria
ENSMUSG00000055652	456.964	556.381	615.17	453.103	279.219	362.183	-0.481379	0.00306043	0.0456419	Klhl25	chr7	+	75848310	75874131	3856	protein_coding	kelch-like_25
ENSMUSG00000064105	173.998	209.634	180.484	271.238	308.61	229.311	0.45196	0.00306531	0.0456688	Cnnm2	chr19	+	46761596	46878795	3558	protein_coding	cyclin_M2
ENSMUSG00000040717	173.119	101.984	150.827	78.9812	58.7829	103.94	-0.590378	0.00307449	0.0457597	Il17rd	chr14	+	27039001	27107286	8220	protein_coding	interleukin_17_receptor_D
ENSMUSG00000022261	2292.73	2233.46	2331.04	2796.56	2742.85	2669.22	0.249561	0.0030784	0.0457719	Sdc2	chr15	+	32920723	33034730	3322	protein_coding	syndecan_2
ENSMUSG00000025196	5384.27	6267.5	6535.55	7480.35	7362.56	7753.72	0.296345	0.00308555	0.0458323	Cpn1	chr19	-	43956307	43986556	3688	protein_coding	carboxypeptidase_N_polypeptide_1
ENSMUSG00000033039	249.573	298.021	291.486	159.002	197.343	223.953	-0.45641	0.00309644	0.0459481	Micall1	chr15	+	79108972	79136897	6701	protein_coding	microtubule_associated_monooxygenase_calponin_and_LIM_domain_containing_-like_1
ENSMUSG00000069237	2076.55	2138.27	2214.95	2403.73	2987.43	2712.09	0.313371	0.00311292	0.046108	Fam8a1	chr13	+	46669522	46678056	3827	protein_coding	family_with_sequence_similarity_8_member_A1
ENSMUSG00000032289	614.266	294.621	532.978	371.004	245.629	215.381	-0.581107	0.00311343	0.046108	Thsd4	chr9	-	59966931	60522046	13986	protein_coding	thrombospondin_type_I_domain_containing_4
ENSMUSG00000054793	623.932	380.742	309.28	333.592	234.082	151.088	-0.603747	0.00312195	0.0461881	Cadm4	chr7	+	24482023	24504539	2161	protein_coding	cell_adhesion_molecule_4
ENSMUSG00000032715	218.816	300.287	199.973	574.692	492.307	228.24	0.598401	0.00313147	0.0462827	Trib3	chr2	-	152337422	152344032	2125	protein_coding	tribbles_homolog_3_(Drosophila)
ENSMUSG00000035948	98.4231	207.368	133.033	207.845	251.927	279.674	0.568223	0.00313974	0.0463587	Acss3	chr10	-	106936164	107123668	4549	protein_coding	acyl-CoA_synthetase_short-chain_family_member_3
ENSMUSG00000027997	688.083	727.488	692.278	1079.76	785.172	944.033	0.376944	0.00314794	0.0464334	Casp6	chr3	+	129901425	129914103	5584	protein_coding	caspase_6
ENSMUSG00000052331	348.875	292.355	300.806	203.688	213.088	257.171	-0.426383	0.00315186	0.0464334	Ankrd44	chr1	-	54645340	54926387	14175	protein_coding	ankyrin_repeat_domain_44
ENSMUSG00000042129	660.841	662.898	524.505	371.004	511.201	440.406	-0.424347	0.00315436	0.0464334	Rassf4	chr6	-	116633008	116673952	9209	protein_coding	Ras_association_(RalGDS/AF-6)_domain_family_member_4
ENSMUSG00000052726	78.2112	111.05	133.88	64.432	56.6835	65.3644	-0.579776	0.00315731	0.0464334	Kcnt2	chr1	+	140246158	140612067	6895	protein_coding	potassium_channel_subfamily_T_member_2
ENSMUSG00000028713	253.967	397.739	412.656	459.338	510.152	664.359	0.505851	0.00316785	0.0465423	Cyp4b1	chr4	-	115624725	115647723	2256	protein_coding	cytochrome_P450_family_4_subfamily_b_polypeptide_1
ENSMUSG00000020423	1195.14	1036.84	915.129	777.341	615.121	872.24	-0.419495	0.00318345	0.0466845	Btg2	chr1	-	134075170	134079120	2743	protein_coding	B_cell_translocation_gene_2_anti-proliferative
ENSMUSG00000025407	137.089	113.316	124.559	78.9812	59.8326	93.2246	-0.541901	0.00318382	0.0466845	Gli1	chr10	-	127329889	127341589	3665	protein_coding	GLI-Kruppel_family_member_GLI1
ENSMUSG00000030605	3927.26	5180.8	4354.49	3585.33	3620.4	3064.63	-0.358182	0.00320668	0.0469733	Mfge8	chr7	-	79133768	79149060	4694	protein_coding	milk_fat_globule-EGF_factor_8_protein
ENSMUSG00000021367	18.4543	31.7285	22.8782	55.079	35.6896	66.4359	0.644726	0.00321098	0.0469802	Edn1	chr13	+	42301270	42307989	2344	protein_coding	endothelin_1
ENSMUSG00000026928	184.543	169.974	106.765	95.6088	103.92	58.9351	-0.591837	0.00321348	0.0469802	Card9	chr2	-	26352176	26360918	2293	protein_coding	caspase_recruitment_domain_family_member_9
ENSMUSG00000020241	2452.67	1781.33	2039.55	1796.82	1413.94	1323.36	-0.415358	0.00321757	0.0469936	Col6a2	chr10	-	76595762	76623630	8326	protein_coding	collagen_type_VI_alpha_2
ENSMUSG00000003585	10135.8	12629.1	12760.1	13928.8	15043.2	17994.5	0.367814	0.00323894	0.0472592	Sec14l2	chr11	-	4097039	4123415	3505	protein_coding	SEC14-like_lipid_binding_2
ENSMUSG00000074093	250.452	277.624	277.928	312.807	395.735	400.759	0.410004	0.0032531	0.0474192	Svip	chr7	-	51997171	52006018	3561	protein_coding	small_VCP/p97-interacting_protein
ENSMUSG00000052384	707.416	686.695	686.347	532.084	577.332	546.489	-0.309708	0.00326434	0.0475363	Nrros	chr16	-	32142785	32165594	4177	protein_coding	negative_regulator_of_reactive_oxygen_species
ENSMUSG00000025872	612.508	620.971	581.277	736.811	849.203	730.795	0.328901	0.00327501	0.047645	Thoc3	chr13	-	54458837	54468849	2428	protein_coding	THO_complex_3
ENSMUSG00000028003	427.086	478.193	520.268	562.221	647.662	683.647	0.372522	0.00330636	0.0480539	Lrat	chr3	-	82892579	82903973	5351	protein_coding	lecithin-retinol_acyltransferase_(phosphatidylcholine-retinol-O-acyltransferase)
ENSMUSG00000026480	1213.59	1179.62	958.344	807.479	948.924	652.572	-0.419779	0.00332117	0.0482219	Ncf2	chr1	+	152800194	152836991	8478	protein_coding	neutrophil_cytosolic_factor_2
ENSMUSG00000018042	12085	11912.9	11686.5	13761.4	16571.5	13913	0.293582	0.00333172	0.0483279	Cyb5r3	chr15	-	83153494	83172592	4298	protein_coding	cytochrome_b5_reductase_3
ENSMUSG00000064796	30.7572	19.2637	10.1681	4.15691	1.04969	7.50083	-0.590217	0.00335901	0.048652	Terc	chr3	-	96414437	96414859	423	misc_RNA	telomerase_RNA_component
ENSMUSG00000047867	442.025	465.728	485.527	555.986	583.63	725.438	0.380633	0.00336484	0.048652	Gimap6	chr6	-	48701582	48708225	3496	protein_coding	GTPase_IMAP_family_member_6
ENSMUSG00000029162	9437.2	9852.82	8178.55	10230.1	15547	11991.7	0.408473	0.00336671	0.048652	Khk	chr5	+	30921431	30931248	1797	protein_coding	ketohexokinase
ENSMUSG00000021457	1468.44	1348.46	1238.81	892.695	1188.25	977.251	-0.370852	0.00336718	0.048652	Syk	chr13	+	52583173	52648792	9362	protein_coding	spleen_tyrosine_kinase
ENSMUSG00000029922	1783.92	1422.11	1520.98	1290.72	1255.44	1019.04	-0.370939	0.00337218	0.0486729	Mkrn1	chr6	-	39397804	39420462	4439	protein_coding	makorin_ring_finger_protein_1
ENSMUSG00000069208	173.119	176.773	155.064	267.081	265.573	198.236	0.457859	0.00337519	0.0486729	Zfp825	chr13	-	74480054	74493970	1406	protein_coding	zinc_finger_protein_825
ENSMUSG00000032182	282.966	406.804	313.517	502.986	496.506	415.76	0.435579	0.00340652	0.0490771	Yipf2	chr9	-	21588709	21592831	2150	protein_coding	Yip1_domain_family_member_2
ENSMUSG00000030972	1696.04	2363.77	2260.71	2941.01	2559.16	2968.19	0.382018	0.00341223	0.0491063	Acsm5	chr7	+	119519463	119545551	3799	protein_coding	acyl-CoA_synthetase_medium-chain_family_member_5
ENSMUSG00000064339	7024.95	7646.56	6041.55	7679.88	9456.7	10596.5	0.381088	0.00341517	0.0491063	mt-Rnr2	chrMT	+	1094	2675	1582	Mt_rRNA	mitochondrially_encoded_16S_rRNA
ENSMUSG00000021754	689.841	661.765	699.905	561.182	525.897	547.561	-0.308635	0.00342966	0.0492552	Map3k1	chr13	-	111746428	111808993	7447	protein_coding	mitogen-activated_protein_kinase_kinase_kinase_1
ENSMUSG00000018442	1950.89	2069.15	1833.65	2601.18	2769.1	2157.03	0.336831	0.00343482	0.0492552	Derl2	chr11	-	71007164	71019841	8049	protein_coding	Der1-like_domain_family_member_2
ENSMUSG00000001507	750.476	506.522	563.482	463.495	381.039	439.334	-0.438747	0.00343548	0.0492552	Itga3	chr11	-	95044474	95076801	5710	protein_coding	integrin_alpha_3
ENSMUSG00000016252	8931.9	9211.45	8687.8	10577.2	11306.3	10223.6	0.249124	0.00346349	0.0496088	Atp5e	chr2	-	174461072	174464105	1756	protein_coding	ATP_synthase_H+_transporting_mitochondrial_F1_complex_epsilon_subunit
ENSMUSG00000021384	173.119	171.107	139.811	102.883	124.914	80.3661	-0.518715	0.00347549	0.0497327	Susd3	chr13	-	49230690	49248706	2837	protein_coding	sushi_domain_containing_3
ENSMUSG00000019564	142.362	141.645	116.933	98.7265	82.9259	76.0799	-0.511651	0.00348396	0.0498058	Arid3a	chr10	+	79927043	79955018	5562	protein_coding	AT_rich_interactive_domain_3A_(BRIGHT-like)
ENSMUSG00000076258	1397.26	1337.13	1569.28	1559.88	2496.17	1984.51	0.427832	0.00349383	0.049878	Gm23935	chr16	+	11144125	11144181	57	miRNA	predicted_gene_23935
ENSMUSG00000049555	101.059	61.1906	82.1922	139.256	170.051	107.155	0.565942	0.00349573	0.049878	Tmie	chr9	-	110865711	110880113	3094	protein_coding	transmembrane_inner_ear
ENSMUSG00000010660	248.694	149.577	205.057	147.57	127.013	99.6539	-0.538315	0.00350567	0.0499718	Plcd1	chr9	-	119071527	119093496	2651	protein_coding	phospholipase_C_delta_1

## Sheet: GSvsM0.GOenrich.UP
Category	ID	Description	GeneRatio	BgRatio	pvalue	padj	geneID	Count
BP	GO:0008202	steroid metabolic process	49/483	247/16729	3.22e-27	1e-23	Pmvk/Scd1/Tm7sf2/Sqle/Nsdhl/Cyp51/Hmgcs1/Msmo1/Fdft1/Sc5d/Ebp/Lipc/Lss/Mvd/Nr1d1/Mvk/0610007P14Rik/Dhcr7/Cyp27a1/Apoa2/Insig1/Apoc1/Cyp2r1/Tecr/Cyp1a2/Bmp2/Pcsk9/Apoc3/Fdps/Fgfr4/Cebpa/Slco1b2/Comt/Prkaa2/Slco1a1/Srd5a1/Dhcr24/Cat/Scp2/Akr1c6/Hsd17b7/Pon1/Hsd17b2/Baat/Agtr1a/Sod1/Pex2/Sec14l2/Cyb5r3	49
BP	GO:0016125	sterol metabolic process	34/483	114/16729	2.06e-25	3.2e-22	Pmvk/Tm7sf2/Sqle/Nsdhl/Cyp51/Hmgcs1/Msmo1/Fdft1/Sc5d/Ebp/Lipc/Lss/Mvd/Mvk/0610007P14Rik/Dhcr7/Cyp27a1/Apoa2/Insig1/Apoc1/Pcsk9/Apoc3/Fdps/Cebpa/Prkaa2/Dhcr24/Cat/Scp2/Hsd17b7/Pon1/Sod1/Pex2/Sec14l2/Cyb5r3	34
BP	GO:0016126	sterol biosynthetic process	24/483	48/16729	1.09e-24	1.13e-21	Pmvk/Tm7sf2/Nsdhl/Cyp51/Hmgcs1/Msmo1/Fdft1/Sc5d/Ebp/Lss/Mvd/Mvk/0610007P14Rik/Dhcr7/Insig1/Fdps/Prkaa2/Dhcr24/Scp2/Hsd17b7/Sod1/Pex2/Sec14l2/Cyb5r3	24
BP	GO:0008203	cholesterol metabolic process	32/483	108/16729	6.94e-24	5.4e-21	Pmvk/Tm7sf2/Sqle/Nsdhl/Cyp51/Hmgcs1/Fdft1/Sc5d/Ebp/Lipc/Lss/Mvd/Mvk/Dhcr7/Cyp27a1/Apoa2/Insig1/Apoc1/Pcsk9/Apoc3/Fdps/Cebpa/Prkaa2/Dhcr24/Cat/Scp2/Hsd17b7/Pon1/Sod1/Pex2/Sec14l2/Cyb5r3	32
BP	GO:1902652	secondary alcohol metabolic process	32/483	109/16729	9.57e-24	5.95e-21	Pmvk/Tm7sf2/Sqle/Nsdhl/Cyp51/Hmgcs1/Fdft1/Sc5d/Ebp/Lipc/Lss/Mvd/Mvk/Dhcr7/Cyp27a1/Apoa2/Insig1/Apoc1/Pcsk9/Apoc3/Fdps/Cebpa/Prkaa2/Dhcr24/Cat/Scp2/Hsd17b7/Pon1/Sod1/Pex2/Sec14l2/Cyb5r3	32
BP	GO:0006695	cholesterol biosynthetic process	22/483	43/16729	5.05e-23	2.25e-20	Pmvk/Tm7sf2/Nsdhl/Cyp51/Hmgcs1/Fdft1/Sc5d/Ebp/Lss/Mvd/Mvk/Dhcr7/Insig1/Fdps/Prkaa2/Dhcr24/Scp2/Hsd17b7/Sod1/Pex2/Sec14l2/Cyb5r3	22
BP	GO:1902653	secondary alcohol biosynthetic process	22/483	43/16729	5.05e-23	2.25e-20	Pmvk/Tm7sf2/Nsdhl/Cyp51/Hmgcs1/Fdft1/Sc5d/Ebp/Lss/Mvd/Mvk/Dhcr7/Insig1/Fdps/Prkaa2/Dhcr24/Scp2/Hsd17b7/Sod1/Pex2/Sec14l2/Cyb5r3	22
BP	GO:1901615	organic hydroxy compound metabolic process	56/483	403/16729	6.53e-23	2.54e-20	Pmvk/Tm7sf2/Sqle/Dbi/Nsdhl/Cyp51/Hmgcs1/Msmo1/Fdft1/Sc5d/Ebp/Lipc/Glo1/Lss/Mvd/Nr1d1/Adh4/Mvk/Atp2b2/0610007P14Rik/Ddc/Dhcr7/Cyp27a1/Apoa2/Insig1/Hagh/Apoc1/Cyp2r1/Bmp2/Pcsk9/Pnpla8/Ttr/Apoc3/Sgms2/Fdps/Fgfr4/Cebpa/Slco1b2/Comt/Prkaa2/Slco1a1/Dhcr24/Cat/Scp2/Hsd17b7/Pon1/Baat/Agtr1a/Sod1/Pecr/Cept1/Pex2/Abhd3/Sec14l2/Lrat/Cyb5r3	56
BP	GO:0044283	small molecule biosynthetic process	57/483	429/16729	2.49e-22	8.62e-20	Pmvk/Scd1/Tm7sf2/Nsdhl/Cyp51/Hmgcs1/Acss2/Msmo1/Fdft1/Cbs/Thnsl2/Sc5d/Elovl6/Ebp/Rgn/Acacb/Lipc/Kynu/Lss/Mvd/Acaca/Adck3/Nr1d1/Mvk/0610007P14Rik/Dhcr7/Cyp27a1/Apoa2/Fam213b/Insig1/Tecr/Bmp2/Pnpla8/Sgms2/Fdps/Fgfr4/Gnmt/Srr/Agxt/Prkaa2/Dhcr24/Scp2/Hsd17b7/Baat/Sod1/Pecr/Adi1/Cept1/Gatm/Pex2/Acly/Otc/Glud1/Trib3/Edn1/Sec14l2/Cyb5r3	57
BP	GO:0006694	steroid biosynthetic process	33/483	130/16729	3.12e-22	9.7e-20	Pmvk/Tm7sf2/Nsdhl/Cyp51/Hmgcs1/Msmo1/Fdft1/Sc5d/Ebp/Lss/Mvd/Nr1d1/Mvk/0610007P14Rik/Dhcr7/Cyp27a1/Insig1/Tecr/Bmp2/Fdps/Fgfr4/Prkaa2/Srd5a1/Dhcr24/Scp2/Akr1c6/Hsd17b7/Hsd17b2/Baat/Sod1/Pex2/Sec14l2/Cyb5r3	33
BP	GO:0006066	alcohol metabolic process	45/483	271/16729	9.68e-22	2.74e-19	Pmvk/Tm7sf2/Sqle/Dbi/Nsdhl/Cyp51/Hmgcs1/Msmo1/Fdft1/Sc5d/Ebp/Lipc/Lss/Mvd/Adh4/Mvk/0610007P14Rik/Dhcr7/Cyp27a1/Apoa2/Insig1/Apoc1/Cyp2r1/Bmp2/Pcsk9/Pnpla8/Ttr/Apoc3/Sgms2/Fdps/Cebpa/Prkaa2/Dhcr24/Cat/Scp2/Hsd17b7/Pon1/Sod1/Pecr/Cept1/Pex2/Abhd3/Sec14l2/Lrat/Cyb5r3	45
BP	GO:0006790	sulfur compound metabolic process	43/483	254/16729	3.73e-21	9.68e-19	Pmvk/Gclc/Acss2/Cbs/Slc35d1/Acacb/Lipc/Kynu/Glo1/Mvd/Acaca/Gstm1/Mvk/Nudt7/Gstm7/Hagh/Sult1c2/Ethe1/Gstm4/Gstm2/Idh1/Ghr/Gstp1/Nox4/Csad/Gnmt/Mgst1/Comt/Agxt/St3gal3/Scp2/Gstt1/Txnl1/Mcee/Mat2b/Baat/Sod1/Btd/Adi1/Gclm/Pipox/Acly/Slc19a2	43
BP	GO:0008610	lipid biosynthetic process	58/483	481/16729	1.33e-20	3.19e-18	Idi1/Pmvk/Scd1/Tm7sf2/Dbi/Nsdhl/Cyp51/Hmgcs1/Acss2/Msmo1/Fdft1/Thnsl2/Sc5d/Elovl6/Ebp/Rgn/Acacb/Lipc/Lss/Mvd/Acaca/Nr1d1/Mvk/0610007P14Rik/Dhcr7/Cyp27a1/Apoa2/Fam213b/Insig1/Tecr/Bmp2/Pnpla8/Apoc3/Sgms2/Pcyt2/Idh1/Fdps/Fgfr4/Prkaa2/Srd5a1/Dhcr24/St3gal3/Scp2/Akr1c6/Hsd17b7/Hsd17b2/Acsl5/Baat/Sod1/Pecr/Cept1/Pik3c3/Pex2/Acly/Trib3/Edn1/Sec14l2/Cyb5r3	58
BP	GO:0046165	alcohol biosynthetic process	29/483	122/16729	7.94e-19	1.76e-16	Pmvk/Tm7sf2/Nsdhl/Cyp51/Hmgcs1/Msmo1/Fdft1/Sc5d/Ebp/Lss/Mvd/Mvk/0610007P14Rik/Dhcr7/Cyp27a1/Apoa2/Insig1/Bmp2/Sgms2/Fdps/Prkaa2/Dhcr24/Scp2/Hsd17b7/Sod1/Cept1/Pex2/Sec14l2/Cyb5r3	29
BP	GO:1901617	organic hydroxy compound biosynthetic process	34/483	180/16729	1.71e-18	3.56e-16	Pmvk/Tm7sf2/Nsdhl/Cyp51/Hmgcs1/Msmo1/Fdft1/Sc5d/Ebp/Lss/Mvd/Nr1d1/Mvk/0610007P14Rik/Ddc/Dhcr7/Cyp27a1/Apoa2/Insig1/Bmp2/Sgms2/Fdps/Fgfr4/Prkaa2/Dhcr24/Scp2/Hsd17b7/Baat/Agtr1a/Sod1/Cept1/Pex2/Sec14l2/Cyb5r3	34
BP	GO:0006631	fatty acid metabolic process	42/483	344/16729	2.33e-15	4.53e-13	Cyp2c29/Scd1/Dbi/Acss2/Msmo1/Fabp1/Thnsl2/Sc5d/Elovl6/Rgn/Acacb/Lipc/Acaca/Irs2/Cyp2c67/Cyp2c38/Apoa2/Fam213b/Insig1/Ces1f/Cyp2j5/Tecr/Cyp2c55/Cyp4f14/Pnpla8/Ghr/Cyp2f2/Adipor2/Prkaa2/Cyp2c44/Pex13/Acsl5/Baat/Cyp2c70/Lonp2/Pecr/Lypla1/Pex2/Acly/Trib3/Edn1/Acsm5	42
BP	GO:0006575	cellular modified amino acid metabolic process	26/483	174/16729	5.75e-12	1.05e-09	Gclc/Cbs/Lipc/Kynu/Glo1/Gstm1/Gstm7/Hagh/Ethe1/Gstm4/Gstm2/Idh1/Ghr/Gstp1/Nox4/Gnmt/Mgst1/Comt/Ero1lb/Gstt1/Mat2b/Sod1/Gclm/Gatm/Pipox/Otc	26
BP	GO:0016053	organic acid biosynthetic process	31/483	249/16729	7.19e-12	1.18e-09	Scd1/Acss2/Msmo1/Cbs/Thnsl2/Sc5d/Elovl6/Rgn/Acacb/Lipc/Kynu/Acaca/Nr1d1/Fam213b/Insig1/Tecr/Pnpla8/Fgfr4/Srr/Agxt/Prkaa2/Baat/Pecr/Adi1/Gatm/Pex2/Acly/Otc/Glud1/Trib3/Edn1	31
BP	GO:0046394	carboxylic acid biosynthetic process	31/483	249/16729	7.19e-12	1.18e-09	Scd1/Acss2/Msmo1/Cbs/Thnsl2/Sc5d/Elovl6/Rgn/Acacb/Lipc/Kynu/Acaca/Nr1d1/Fam213b/Insig1/Tecr/Pnpla8/Fgfr4/Srr/Agxt/Prkaa2/Baat/Pecr/Adi1/Gatm/Pex2/Acly/Otc/Glud1/Trib3/Edn1	31
BP	GO:0006749	glutathione metabolic process	14/483	47/16729	3.31e-11	5.15e-09	Gclc/Glo1/Gstm1/Gstm7/Hagh/Ethe1/Gstm4/Gstm2/Idh1/Gstp1/Mgst1/Gstt1/Sod1/Gclm	14
BP	GO:1901605	alpha-amino acid metabolic process	27/483	203/16729	3.61e-11	5.34e-09	Gclc/Cbs/Thnsl2/Lipc/Kynu/Tat/Hibadh/Nit2/Gldc/Ghr/Nox4/Csad/Gnmt/Comt/Srr/Agxt/Ero1lb/Oat/Amt/Amdhd1/Baat/Adi1/Gclm/Gatm/Pipox/Otc/Glud1	27
BP	GO:0044282	small molecule catabolic process	29/483	235/16729	4.32e-11	6.1e-09	Dbi/Fabp1/Thnsl2/Kynu/Glo1/Adh4/Irs2/Cyp26b1/Ces1f/Hagh/Tat/Hibadh/Gldc/Pnpla8/Csad/Agxt/Pex13/Oat/Amt/Amdhd1/Pon1/Acsl5/Lonp2/Cbr3/Pipox/Pex2/Otc/Glud1/Khk	29
BP	GO:0072330	monocarboxylic acid biosynthetic process	25/483	176/16729	4.59e-11	6.2e-09	Scd1/Acss2/Msmo1/Thnsl2/Sc5d/Elovl6/Rgn/Acacb/Lipc/Acaca/Nr1d1/Fam213b/Insig1/Tecr/Pnpla8/Fgfr4/Srr/Agxt/Prkaa2/Baat/Pecr/Pex2/Acly/Trib3/Edn1	25
BP	GO:0051186	cofactor metabolic process	33/483	315/16729	1.64e-10	2.12e-08	Pmvk/Acss2/Me1/Qdpr/Acacb/Kynu/Mvd/Acaca/Adck3/Adh4/Mvk/Coasy/Nudt7/Pcbd1/Cyp1a2/Haao/Akr7a5/Gnmt/Prkaa2/Aspdh/Mdh1/Scp2/Akr1c6/Mcee/Mat2b/Baat/Btd/Cbr3/Pipox/Hebp1/Acly/Mocos/Khk	33
BP	GO:0016054	organic acid catabolic process	23/483	163/16729	3.16e-10	3.79e-08	Dbi/Fabp1/Thnsl2/Kynu/Irs2/Cyp26b1/Ces1f/Tat/Hibadh/Gldc/Csad/Agxt/Pex13/Oat/Amt/Amdhd1/Pon1/Acsl5/Lonp2/Pipox/Pex2/Otc/Glud1	23
BP	GO:0046395	carboxylic acid catabolic process	23/483	163/16729	3.16e-10	3.79e-08	Dbi/Fabp1/Thnsl2/Kynu/Irs2/Cyp26b1/Ces1f/Tat/Hibadh/Gldc/Csad/Agxt/Pex13/Oat/Amt/Amdhd1/Pon1/Acsl5/Lonp2/Pipox/Pex2/Otc/Glud1	23
BP	GO:0019216	regulation of lipid metabolic process	29/483	263/16729	6.52e-10	7.51e-08	Scd1/Dbi/Fabp1/Rgn/Acacb/Nr1d1/Irs2/Dhcr7/Apoa2/Insig1/Bmp2/Aadac/Apoc3/Idh1/Fdps/Fgfr4/Atg14/Prkaa2/Nr1d2/Tek/Scp2/Cdk8/Acsl5/Agtr1a/Sod1/Lonp2/Pex2/Trib3/Sec14l2	29
BP	GO:0006720	isoprenoid metabolic process	15/483	68/16729	7.08e-10	7.87e-08	Idi1/Pmvk/Rdh11/Hmgcs1/Fdft1/Mvd/Adh4/Mvk/Cyp26b1/Cyp1a2/Bco2/Ttr/Fdps/Pecr/Lrat	15
BP	GO:0042180	cellular ketone metabolic process	24/483	185/16729	7.55e-10	8.1e-08	Dbi/Fabp1/Rgn/Acacb/Kynu/Glo1/Adck3/Nr1d1/Adh4/Irs2/Insig1/Hagh/Bmp2/Fgfr4/Akr7a5/Gnmt/Comt/Srd5a1/Scp2/Akr1c6/Acsl5/Lonp2/Cbr3/Trib3	24
BP	GO:0009410	response to xenobiotic stimulus	17/483	91/16729	8.16e-10	8.46e-08	Cyp2c29/Gclc/Cyp2c67/Cyp2c38/Cyp2j5/Gstm7/Cyp2r1/Cyp2c55/Gstm4/Gstm2/Cyp2f2/Rhbdd3/Akr1c13/Cyp2c44/Gstt1/Cyp2c70/Akr1c12	17
BP	GO:0006520	cellular amino acid metabolic process	29/483	274/16729	1.7e-09	1.71e-07	Gclc/Cbs/Thnsl2/Lipc/Kynu/Ddc/Tat/Hibadh/Nit2/Gldc/Ghr/Nox4/Csad/Bphl/Gnmt/Comt/Srr/Agxt/Ero1lb/Oat/Amt/Amdhd1/Baat/Adi1/Gclm/Gatm/Pipox/Otc/Glud1	29
BP	GO:0006084	acetyl-CoA metabolic process	10/483	28/16729	3.02e-09	2.93e-07	Pmvk/Acss2/Acacb/Kynu/Mvd/Acaca/Mvk/Nudt7/Pipox/Acly	10
BP	GO:0006633	fatty acid biosynthetic process	19/483	130/16729	6.16e-09	5.81e-07	Scd1/Acss2/Msmo1/Thnsl2/Sc5d/Elovl6/Rgn/Acacb/Lipc/Acaca/Fam213b/Insig1/Tecr/Pnpla8/Prkaa2/Pecr/Acly/Trib3/Edn1	19
BP	GO:0042737	drug catabolic process	12/483	48/16729	7.93e-09	7.26e-07	Cyp2c29/Cyp2c67/Cyp2c38/Cyp2j5/Cyp2r1/Cyp2c55/Cyp1a2/Cyp2f2/Cyp2c44/Cyp2c70/Fmo4/Cyp4b1	12
BP	GO:0006805	xenobiotic metabolic process	15/483	81/16729	9.21e-09	8.18e-07	Cyp2c29/Cyp2c67/Cyp2c38/Cyp2j5/Gstm7/Cyp2r1/Cyp2c55/Gstm4/Gstm2/Cyp2f2/Akr1c13/Cyp2c44/Gstt1/Cyp2c70/Akr1c12	15
BP	GO:0006732	coenzyme metabolic process	27/483	266/16729	1.54e-08	1.33e-06	Pmvk/Acss2/Me1/Qdpr/Acacb/Kynu/Mvd/Acaca/Adck3/Mvk/Coasy/Nudt7/Pcbd1/Haao/Gnmt/Prkaa2/Aspdh/Mdh1/Scp2/Mcee/Mat2b/Baat/Cbr3/Pipox/Acly/Mocos/Khk	27
BP	GO:0071466	cellular response to xenobiotic stimulus	15/483	85/16729	1.83e-08	1.54e-06	Cyp2c29/Cyp2c67/Cyp2c38/Cyp2j5/Gstm7/Cyp2r1/Cyp2c55/Gstm4/Gstm2/Cyp2f2/Akr1c13/Cyp2c44/Gstt1/Cyp2c70/Akr1c12	15
BP	GO:1901606	alpha-amino acid catabolic process	13/483	64/16729	2.83e-08	2.31e-06	Thnsl2/Kynu/Tat/Hibadh/Gldc/Csad/Agxt/Oat/Amt/Amdhd1/Pipox/Otc/Glud1	13
BP	GO:0006637	acyl-CoA metabolic process	13/483	67/16729	5.05e-08	3.92e-06	Pmvk/Acss2/Acacb/Kynu/Mvd/Acaca/Mvk/Nudt7/Scp2/Mcee/Baat/Pipox/Acly	13
BP	GO:0035383	thioester metabolic process	13/483	67/16729	5.05e-08	3.92e-06	Pmvk/Acss2/Acacb/Kynu/Mvd/Acaca/Mvk/Nudt7/Scp2/Mcee/Baat/Pipox/Acly	13
BP	GO:0009069	serine family amino acid metabolic process	10/483	37/16729	6.34e-08	4.81e-06	Gclc/Cbs/Thnsl2/Gldc/Csad/Srr/Agxt/Amt/Baat/Gclm	10
BP	GO:0042738	exogenous drug catabolic process	11/483	47/16729	7.06e-08	5.23e-06	Cyp2c29/Cyp2c67/Cyp2c38/Cyp2j5/Cyp2r1/Cyp2c55/Cyp1a2/Cyp2f2/Cyp2c44/Cyp2c70/Cyp4b1	11
BP	GO:0043648	dicarboxylic acid metabolic process	14/483	83/16729	9.9e-08	7.16e-06	Gclc/Me1/Kynu/Tat/Haao/Nit2/Idh1/Ghr/Acmsd/Mdh1/Oat/Amdhd1/Gclm/Glud1	14
BP	GO:0042493	response to drug	24/483	238/16729	1.11e-07	7.83e-06	Cyp2c29/Abcb11/Gstm1/Cyp2c67/Cyp2c38/Cyp2j5/Cyp2r1/Cyp2c55/Cyp1a2/Gstm3/Cyp2f2/Slco1b2/Mgst1/Ube2b/Prkaa2/Cyp2c44/Srd5a1/Serpina7/Akr1c6/Cyp2c70/Sod1/Gclm/Pde2a/Cyp4b1	24
BP	GO:0017144	drug metabolic process	12/483	61/16729	1.41e-07	9.75e-06	Cyp2c29/Cyp2c67/Cyp2c38/Cyp2j5/Cyp2r1/Cyp2c55/Cyp1a2/Cyp2f2/Cyp2c44/Cyp2c70/Fmo4/Cyp4b1	12
BP	GO:0000096	sulfur amino acid metabolic process	9/483	32/16729	2.01e-07	1.35e-05	Gclc/Cbs/Nox4/Csad/Gnmt/Comt/Agxt/Adi1/Gclm	9
BP	GO:0009063	cellular amino acid catabolic process	13/483	75/16729	2.04e-07	1.35e-05	Thnsl2/Kynu/Tat/Hibadh/Gldc/Csad/Agxt/Oat/Amt/Amdhd1/Pipox/Otc/Glud1	13
BP	GO:0045834	positive regulation of lipid metabolic process	16/483	122/16729	4.49e-07	2.91e-05	Scd1/Dbi/Fabp1/Rgn/Nr1d1/Irs2/Apoa2/Aadac/Apoc3/Fdps/Atg14/Tek/Scp2/Acsl5/Agtr1a/Sec14l2	16
BP	GO:0046890	regulation of lipid biosynthetic process	16/483	127/16729	7.81e-07	4.96e-05	Dbi/Rgn/Nr1d1/Dhcr7/Insig1/Bmp2/Apoc3/Idh1/Fdps/Fgfr4/Scp2/Acsl5/Sod1/Pex2/Trib3/Sec14l2	16
BP	GO:0006639	acylglycerol metabolic process	14/483	98/16729	8.22e-07	5.11e-05	Scd1/Dbi/Rgn/Lipc/Apoa2/Insig1/Apoc1/Pcsk9/Aadac/Apoc3/Atg14/Cat/Cdk8/Acsl5	14
BP	GO:0006721	terpenoid metabolic process	10/483	48/16729	8.96e-07	5.37e-05	Rdh11/Fdft1/Adh4/Cyp26b1/Cyp1a2/Bco2/Ttr/Fdps/Pecr/Lrat	10
BP	GO:0006641	triglyceride metabolic process	13/483	85/16729	9.15e-07	5.37e-05	Scd1/Dbi/Rgn/Lipc/Insig1/Apoc1/Pcsk9/Aadac/Apoc3/Atg14/Cat/Cdk8/Acsl5	13
BP	GO:0019218	regulation of steroid metabolic process	13/483	85/16729	9.15e-07	5.37e-05	Scd1/Nr1d1/Dhcr7/Apoa2/Insig1/Bmp2/Fdps/Fgfr4/Scp2/Agtr1a/Sod1/Pex2/Sec14l2	13
BP	GO:0006638	neutral lipid metabolic process	14/483	100/16729	1.06e-06	6.07e-05	Scd1/Dbi/Rgn/Lipc/Apoa2/Insig1/Apoc1/Pcsk9/Aadac/Apoc3/Atg14/Cat/Cdk8/Acsl5	14
BP	GO:0097164	ammonium ion metabolic process	16/483	130/16729	1.07e-06	6.07e-05	Dbi/Lipc/Atp2b2/Ddc/Apoa2/Pnpla8/Sgms2/Akr7a5/Pebp1/Comt/Akr1c6/Pon1/Agtr1a/Cept1/Abhd3/Lrat	16
BP	GO:0009896	positive regulation of catabolic process	24/483	275/16729	1.56e-06	8.66e-05	Gclc/Fabp1/Rgn/Irs2/Mapk15/Apoa2/Pcsk9/Aadac/Atg14/Flcn/Rhbdd3/Prkaa2/Trp53inp1/Plk3/Oaz1/Tob1/Acsl5/Rnf19b/Rnf152/Ndufa13/Dnajb2/Rdx/Trib3/Svip	24
BP	GO:1901565	organonitrogen compound catabolic process	20/483	207/16729	2.48e-06	0.00013517	Thnsl2/Kynu/Nudt7/Tat/Hibadh/Gldc/Pnpla8/Csad/Comt/Agxt/Aspdh/Oat/Ide/Amt/Amdhd1/Pipox/Otc/Pde2a/Glud1/Cpn1	20
BP	GO:0046470	phosphatidylcholine metabolic process	8/483	33/16729	3.35e-06	0.00017962	Dbi/Lipc/Apoa2/Pnpla8/Pon1/Cept1/Abhd3/Lrat	8
BP	GO:0045540	regulation of cholesterol biosynthetic process	6/483	16/16729	3.52e-06	0.0001853	Dhcr7/Fdps/Scp2/Sod1/Pex2/Sec14l2	6
BP	GO:0044242	cellular lipid catabolic process	16/483	145/16729	4.59e-06	0.00023791	Dbi/Fabp1/Lipc/Irs2/Cyp26b1/Apoa2/Ces1f/Aadac/Pnpla8/Bco2/Apoc3/Idh1/Pex13/Acsl5/Lonp2/Pex2	16
BP	GO:0090407	organophosphate biosynthetic process	30/483	421/16729	5.43e-06	0.00027678	Pmvk/Acacb/Kynu/Mvd/Mvk/Coasy/Pygl/Apoa2/Haao/Ramp2/Sgms2/Pcyt2/Idh1/Fdps/Flcn/Galr3/Atp5j/Aspdh/Paics/Scp2/Adk/Acsl5/Gnpnat1/Cept1/Atp5g1/Pik3c3/Mocos/Pde2a/Edn1/Atp5e	30
BP	GO:0055088	lipid homeostasis	14/483	116/16729	6.35e-06	0.0003186	Lipc/Acaca/Nr1d1/Gckr/Apoa2/Pcsk9/Apoc3/Fgfr4/Cebpa/Prkaa2/Tmem97/Nr1d2/Pex2/Col4a3bp	14
BP	GO:0050994	regulation of lipid catabolic process	9/483	47/16729	6.64e-06	0.00032789	Dbi/Fabp1/Irs2/Apoa2/Aadac/Apoc3/Idh1/Acsl5/Lonp2	9
BP	GO:0009071	serine family amino acid catabolic process	5/483	11/16729	7.86e-06	0.00038206	Thnsl2/Gldc/Csad/Agxt/Amt	5
BP	GO:0009108	coenzyme biosynthetic process	12/483	88/16729	8.21e-06	0.00039278	Acss2/Qdpr/Acacb/Kynu/Adck3/Coasy/Pcbd1/Haao/Aspdh/Mat2b/Acly/Mocos	12
BP	GO:0006644	phospholipid metabolic process	23/483	283/16729	8.45e-06	0.00039787	Pmvk/Dbi/Fdft1/Lipc/Mvd/Mvk/Apoa2/Pcsk9/Ip6k2/Pnpla8/Sgms2/Pcyt2/Idh1/Fdps/Atg14/Tek/Pon1/Acsl5/Cept1/Pik3c3/Ppapdc1b/Abhd3/Lrat	23
BP	GO:0008299	isoprenoid biosynthetic process	7/483	27/16729	8.61e-06	0.00039787	Idi1/Pmvk/Hmgcs1/Fdft1/Mvd/Mvk/Fdps	7
BP	GO:0019369	arachidonic acid metabolic process	10/483	61/16729	8.83e-06	0.00039787	Cyp2c29/Cyp2c67/Cyp2c38/Cyp2j5/Cyp2c55/Cyp4f14/Pnpla8/Cyp2f2/Cyp2c44/Cyp2c70	10
BP	GO:0050810	regulation of steroid biosynthetic process	10/483	61/16729	8.83e-06	0.00039787	Nr1d1/Dhcr7/Insig1/Bmp2/Fdps/Fgfr4/Scp2/Sod1/Pex2/Sec14l2	10
BP	GO:0044106	cellular amine metabolic process	13/483	104/16729	9.21e-06	0.00040904	Dbi/Lipc/Kynu/Apoa2/Pnpla8/Sgms2/Pebp1/Comt/Oaz1/Pon1/Cept1/Abhd3/Lrat	13
BP	GO:0033559	unsaturated fatty acid metabolic process	13/483	105/16729	1.02e-05	0.00044304	Cyp2c29/Scd1/Cyp2c67/Cyp2c38/Fam213b/Cyp2j5/Cyp2c55/Cyp4f14/Pnpla8/Cyp2f2/Cyp2c44/Cyp2c70/Edn1	13
BP	GO:0006766	vitamin metabolic process	10/483	62/16729	1.03e-05	0.00044304	Gclc/Rgn/Cyp26b1/Cyp27a1/Cyp2r1/Mmab/Btd/Slc19a2/Mmadhc/Lrat	10
BP	GO:0019373	epoxygenase P450 pathway	7/483	28/16729	1.12e-05	0.00047702	Cyp2c29/Cyp2c67/Cyp2c38/Cyp2c55/Cyp2f2/Cyp2c44/Cyp2c70	7
BP	GO:0001676	long-chain fatty acid metabolic process	12/483	91/16729	1.17e-05	0.00049011	Cyp2c29/Elovl6/Cyp2c67/Cyp2c38/Cyp2j5/Cyp2c55/Cyp4f14/Pnpla8/Cyp2f2/Cyp2c44/Acsl5/Cyp2c70	12
BP	GO:0042439	ethanolamine-containing compound metabolic process	9/483	51/16729	1.34e-05	0.00055507	Dbi/Lipc/Apoa2/Pnpla8/Sgms2/Pon1/Cept1/Abhd3/Lrat	9
BP	GO:0006576	cellular biogenic amine metabolic process	11/483	78/16729	1.41e-05	0.00057608	Dbi/Lipc/Kynu/Apoa2/Pnpla8/Sgms2/Oaz1/Pon1/Cept1/Abhd3/Lrat	11
BP	GO:0010565	regulation of cellular ketone metabolic process	14/483	127/16729	1.82e-05	0.00073506	Dbi/Fabp1/Rgn/Acacb/Nr1d1/Irs2/Insig1/Bmp2/Fgfr4/Gnmt/Comt/Acsl5/Lonp2/Trib3	14
BP	GO:0009308	amine metabolic process	13/483	111/16729	1.88e-05	0.00075025	Dbi/Lipc/Kynu/Apoa2/Pnpla8/Sgms2/Pebp1/Comt/Oaz1/Pon1/Cept1/Abhd3/Lrat	13
BP	GO:0006869	lipid transport	21/483	258/16729	2.03e-05	0.00078823	Stard4/Fabp1/Lipc/Abcb11/Irs2/Apoa2/Cyp2j5/Apoc1/Abca8b/Pnpla8/Apoc3/Slco1b2/Sigmar1/Slco1a1/Scp2/Pon1/Acsl5/Agtr1a/Col4a3bp/Edn1/Lrat	21
BP	GO:0046486	glycerolipid metabolic process	21/483	258/16729	2.03e-05	0.00078823	Scd1/Dbi/Rgn/Lipc/Apoa2/Insig1/Apoc1/Pcsk9/Ip6k2/Aadac/Pnpla8/Apoc3/Atg14/Cat/Cdk8/Pon1/Acsl5/Cept1/Pik3c3/Abhd3/Lrat	21
BP	GO:0031331	positive regulation of cellular catabolic process	19/483	220/16729	2.21e-05	0.00084672	Gclc/Fabp1/Rgn/Irs2/Pcsk9/Aadac/Atg14/Flcn/Prkaa2/Trp53inp1/Plk3/Tob1/Acsl5/Rnf19b/Rnf152/Dnajb2/Rdx/Trib3/Svip	19
BP	GO:0044272	sulfur compound biosynthetic process	12/483	97/16729	2.25e-05	0.00085463	Gclc/Acss2/Cbs/Slc35d1/Acacb/Lipc/Hagh/St3gal3/Mat2b/Adi1/Gclm/Acly	12
BP	GO:0045940	positive regulation of steroid metabolic process	7/483	31/16729	2.31e-05	0.00086439	Scd1/Nr1d1/Apoa2/Fdps/Scp2/Agtr1a/Sec14l2	7
BP	GO:0006690	icosanoid metabolic process	12/483	100/16729	3.07e-05	0.00112355	Cyp2c29/Cyp2c67/Cyp2c38/Fam213b/Cyp2j5/Cyp2c55/Cyp4f14/Pnpla8/Cyp2f2/Cyp2c44/Cyp2c70/Edn1	12
BP	GO:1901568	fatty acid derivative metabolic process	12/483	100/16729	3.07e-05	0.00112355	Cyp2c29/Cyp2c67/Cyp2c38/Fam213b/Cyp2j5/Cyp2c55/Cyp4f14/Pnpla8/Cyp2f2/Cyp2c44/Cyp2c70/Edn1	12
BP	GO:0006536	glutamate metabolic process	6/483	23/16729	3.73e-05	0.00133357	Gclc/Tat/Oat/Amdhd1/Gclm/Glud1	6
BP	GO:0090181	regulation of cholesterol metabolic process	6/483	23/16729	3.73e-05	0.00133357	Dhcr7/Fdps/Scp2/Sod1/Pex2/Sec14l2	6
BP	GO:0010876	lipid localization	22/483	295/16729	4.95e-05	0.00174786	Stard4/Fabp1/Acacb/Lipc/Abcb11/Irs2/Apoa2/Cyp2j5/Apoc1/Abca8b/Pnpla8/Apoc3/Slco1b2/Sigmar1/Slco1a1/Scp2/Pon1/Acsl5/Agtr1a/Col4a3bp/Edn1/Lrat	22
BP	GO:0031998	regulation of fatty acid beta-oxidation	5/483	16/16729	6.59e-05	0.00230409	Dbi/Fabp1/Irs2/Acsl5/Lonp2	5
BP	GO:0034754	cellular hormone metabolic process	10/483	77/16729	7.11e-05	0.00245736	Adh4/Cyp26b1/Bmp2/Bco2/Ttr/Comt/Srd5a1/Scp2/Hsd17b2/Lrat	10
BP	GO:0030258	lipid modification	15/483	162/16729	7.26e-05	0.0024798	Scd1/Dbi/Fabp1/Acacb/Irs2/Apoa2/Ip6k2/Adipor2/Pex13/Acsl5/Agtr1a/Lonp2/Pik3c3/Pex2/Ppapdc1b	15
BP	GO:0051188	cofactor biosynthetic process	12/483	115/16729	0.00012203	0.00411869	Acss2/Qdpr/Acacb/Kynu/Adck3/Coasy/Pcbd1/Haao/Aspdh/Mat2b/Acly/Mocos	12
BP	GO:0046320	regulation of fatty acid oxidation	6/483	28/16729	0.00012316	0.00411869	Dbi/Fabp1/Acacb/Irs2/Acsl5/Lonp2	6
BP	GO:0019217	regulation of fatty acid metabolic process	9/483	67/16729	0.00012503	0.00413669	Dbi/Fabp1/Rgn/Acacb/Irs2/Insig1/Acsl5/Lonp2/Trib3	9
BP	GO:0006081	cellular aldehyde metabolic process	8/483	54/16729	0.00014755	0.00483026	Rdh11/Glo1/Adh4/Hagh/Bco2/Idh1/Agxt/Khk	8
BP	GO:0072329	monocarboxylic acid catabolic process	10/483	84/16729	0.00014953	0.00484407	Dbi/Fabp1/Irs2/Cyp26b1/Ces1f/Agxt/Pex13/Acsl5/Lonp2/Pex2	10
BP	GO:0045833	negative regulation of lipid metabolic process	9/483	70/16729	0.00017618	0.00564874	Dbi/Acacb/Apoa2/Insig1/Bmp2/Apoc3/Cdk8/Sod1/Trib3	9
BP	GO:0008206	bile acid metabolic process	6/483	30/16729	0.00018484	0.00586598	Nr1d1/Fgfr4/Slco1b2/Slco1a1/Baat/Pex2	6
BP	GO:0016101	diterpenoid metabolic process	7/483	43/16729	0.00020959	0.00658407	Rdh11/Adh4/Cyp26b1/Bco2/Ttr/Pecr/Lrat	7
BP	GO:0042537	benzene-containing compound metabolic process	5/483	20/16729	0.0002127	0.00661497	Kynu/Gstm7/Gstm4/Gstm2/Cyp4b1	5
BP	GO:0042445	hormone metabolic process	13/483	142/16729	0.00024263	0.00747119	Adh4/Cyp26b1/Bmp2/Bco2/Ttr/Comt/Ero1lb/Srd5a1/Scp2/Ide/Hsd17b2/Corin/Lrat	13
BP	GO:0006767	water-soluble vitamin metabolic process	6/483	32/16729	0.00026864	0.00819091	Gclc/Rgn/Mmab/Btd/Slc19a2/Mmadhc	6
BP	GO:0009064	glutamine family amino acid metabolic process	8/483	59/16729	0.00027724	0.008371	Gclc/Tat/Nit2/Oat/Amdhd1/Gclm/Otc/Glud1	8
BP	GO:0016042	lipid catabolic process	17/483	224/16729	0.00028389	0.00848947	Dbi/Fabp1/Lipc/Irs2/Cyp26b1/Apoa2/Ces1f/Cyp1a2/Aadac/Pnpla8/Bco2/Apoc3/Idh1/Pex13/Acsl5/Lonp2/Pex2	17
BP	GO:0050996	positive regulation of lipid catabolic process	5/483	22/16729	0.00034445	0.0102022	Fabp1/Irs2/Apoa2/Aadac/Acsl5	5
BP	GO:1902930	regulation of alcohol biosynthetic process	7/483	48/16729	0.00042295	0.0124092	Dhcr7/Bmp2/Fdps/Scp2/Sod1/Pex2/Sec14l2	7
BP	GO:0042554	superoxide anion generation	5/483	23/16729	0.00042976	0.0124913	Gstp1/Nox4/Agtr1a/Sod1/Edn1	5
BP	GO:0007031	peroxisome organization	6/483	35/16729	0.00044721	0.0128779	Pex13/Scp2/Lonp2/Pik3c3/Pex2/Pex6	6
BP	GO:0051289	protein homotetramerization	8/483	64/16729	0.00048799	0.0139234	Acacb/Acaca/Pcbd1/Gnmt/Srr/Cat/Ide/Rxrg	8
BP	GO:0006544	glycine metabolic process	4/483	14/16729	0.00054558	0.0152977	Gldc/Agxt/Amt/Baat	4
BP	GO:0006801	superoxide metabolic process	7/483	50/16729	0.000546	0.0152977	Cbs/Rgn/Gstp1/Nox4/Agtr1a/Sod1/Edn1	7
BP	GO:0019395	fatty acid oxidation	9/483	82/16729	0.00058526	0.0162513	Dbi/Fabp1/Acacb/Irs2/Adipor2/Pex13/Acsl5/Lonp2/Pex2	9
BP	GO:0042632	cholesterol homeostasis	8/483	66/16729	0.00060221	0.0164288	Lipc/Nr1d1/Apoa2/Pcsk9/Apoc3/Fgfr4/Tmem97/Pex2	8
BP	GO:0055092	sterol homeostasis	8/483	66/16729	0.00060221	0.0164288	Lipc/Nr1d1/Apoa2/Pcsk9/Apoc3/Fgfr4/Tmem97/Pex2	8
BP	GO:0034440	lipid oxidation	9/483	84/16729	0.00069885	0.0188995	Dbi/Fabp1/Acacb/Irs2/Adipor2/Pex13/Acsl5/Lonp2/Pex2	9
BP	GO:1901661	quinone metabolic process	5/483	26/16729	0.00078227	0.0209728	Adck3/Adh4/Akr7a5/Akr1c6/Cbr3	5
BP	GO:0090207	regulation of triglyceride metabolic process	6/483	39/16729	0.00081544	0.0216753	Rgn/Aadac/Apoc3/Atg14/Cdk8/Acsl5	6
BP	GO:0046889	positive regulation of lipid biosynthetic process	8/483	70/16729	0.00089531	0.0235967	Dbi/Rgn/Nr1d1/Apoc3/Fdps/Scp2/Acsl5/Sec14l2	8
BP	GO:0015936	coenzyme A metabolic process	4/483	16/16729	0.00094748	0.0247617	Acacb/Coasy/Nudt7/Mcee	4
BP	GO:0048545	response to steroid hormone	15/483	206/16729	0.00097382	0.0252382	Nr1d1/Mapk15/Socs2/Tat/Idh1/Ghr/Agxt/Nr1d2/Tek/Ugt3a1/Akr1c6/Agtr1a/Nr3c2/Rxrg/Cpn1	15
BP	GO:0009062	fatty acid catabolic process	8/483	71/16729	0.00098402	0.0252918	Dbi/Fabp1/Irs2/Ces1f/Pex13/Acsl5/Lonp2/Pex2	8
BP	GO:0033993	response to lipid	27/483	489/16729	0.00103119	0.0262869	Scd1/Acaca/Nr1d1/Mapk15/Lgals9/Socs2/Tat/Idh1/Ghr/Gbp10/Gstp1/Mgst1/Agxt/Prkaa2/Nr1d2/Tek/Ugt3a1/Serpina7/Akr1c6/Hsd17b2/Agtr1a/Nr3c2/Tie1/Ndufa13/Rxrg/Rpl36al/Cpn1	27
BP	GO:0001523	retinoid metabolic process	6/483	41/16729	0.00107044	0.0270656	Rdh11/Adh4/Cyp26b1/Bco2/Ttr/Lrat	6
BP	GO:0006625	protein targeting to peroxisome	4/483	17/16729	0.00121094	0.0291941	Pex13/Lonp2/Pex2/Pex6	4
BP	GO:0006699	bile acid biosynthetic process	4/483	17/16729	0.00121094	0.0291941	Nr1d1/Fgfr4/Baat/Pex2	4
BP	GO:0043574	peroxisomal transport	4/483	17/16729	0.00121094	0.0291941	Pex13/Lonp2/Pex2/Pex6	4
BP	GO:0045922	negative regulation of fatty acid metabolic process	4/483	17/16729	0.00121094	0.0291941	Dbi/Acacb/Insig1/Trib3	4
BP	GO:0072662	protein localization to peroxisome	4/483	17/16729	0.00121094	0.0291941	Pex13/Lonp2/Pex2/Pex6	4
BP	GO:0072663	establishment of protein localization to peroxisome	4/483	17/16729	0.00121094	0.0291941	Pex13/Lonp2/Pex2/Pex6	4
BP	GO:0003179	heart valve morphogenesis	5/483	31/16729	0.00179462	0.0429328	Efna1/Fgfrl1/Bmp2/Zfpm1/Erg	5
BP	GO:0042398	cellular modified amino acid biosynthetic process	6/483	46/16729	0.00197508	0.0468893	Gclc/Hagh/Mat2b/Gclm/Gatm/Otc	6
CC	GO:0005777	peroxisome	24/490	138/16924	1.42e-12	2.43e-10	Idi1/Pmvk/Fabp1/Mvd/Mvk/Nudt7/Pnpla8/Idh1/Fdps/Mgst1/Agxt/Cat/Pex13/Scp2/Hrsp12/Ide/Baat/Sod1/Lonp2/Pecr/Pik3c3/Pipox/Pex2/Pex6	24
CC	GO:0042579	microbody	24/490	138/16924	1.42e-12	2.43e-10	Idi1/Pmvk/Fabp1/Mvd/Mvk/Nudt7/Pnpla8/Idh1/Fdps/Mgst1/Agxt/Cat/Pex13/Scp2/Hrsp12/Ide/Baat/Sod1/Lonp2/Pecr/Pik3c3/Pipox/Pex2/Pex6	24
CC	GO:0044438	microbody part	13/490	64/16924	2.93e-08	2.5e-06	Fabp1/Mvd/Pnpla8/Mgst1/Agxt/Cat/Pex13/Scp2/Ide/Lonp2/Pecr/Pex2/Pex6	13
CC	GO:0044439	peroxisomal part	13/490	64/16924	2.93e-08	2.5e-06	Fabp1/Mvd/Pnpla8/Mgst1/Agxt/Cat/Pex13/Scp2/Ide/Lonp2/Pecr/Pex2/Pex6	13
CC	GO:0005743	mitochondrial inner membrane	28/490	370/16924	3.81e-06	0.00026061	Slc25a1/Cyb5b/Cyp27a1/Ociad2/Nipsnap1/Abca8b/Ugt2b5/Ndufa4/Grpel2/Slc25a21/Mgst1/Gcat/Atp5j/Tmem70/Pmpcb/Cml1/Cox7a2/Acsl5/Ndufv3/Atp5g1/Ndufa13/Gatm/Ghitm/Cox6c/Otc/Glud1/Cyb5r3/Atp5e	28
CC	GO:0019866	organelle inner membrane	29/490	404/16924	7.17e-06	0.0004086	Slc25a1/Cyb5b/Cyp27a1/Ociad2/Nipsnap1/Abca8b/Ugt2b5/Ndufa4/Grpel2/Slc25a21/Mgst1/Gcat/Atp5j/Tmem70/Pmpcb/Cml1/Ifi27/Cox7a2/Acsl5/Ndufv3/Atp5g1/Ndufa13/Gatm/Ghitm/Cox6c/Otc/Glud1/Cyb5r3/Atp5e	29
CC	GO:0005782	peroxisomal matrix	6/490	19/16924	1.12e-05	0.00048068	Fabp1/Mvd/Agxt/Scp2/Ide/Lonp2	6
CC	GO:0031907	microbody lumen	6/490	19/16924	1.12e-05	0.00048068	Fabp1/Mvd/Agxt/Scp2/Ide/Lonp2	6
CC	GO:0031301	integral component of organelle membrane	17/490	210/16924	0.00013605	0.00516982	Scd1/Tm7sf2/Elovl6/Dhcr7/Insig1/Tecr/Sgms2/Lrit1/Tmem70/Pex13/St3gal3/Rer1/Rnf152/Emc9/Fam134b/Pex2/Derl2	17
CC	GO:0031300	intrinsic component of organelle membrane	17/490	220/16924	0.00023751	0.00812292	Scd1/Tm7sf2/Elovl6/Dhcr7/Insig1/Tecr/Sgms2/Lrit1/Tmem70/Pex13/St3gal3/Rer1/Rnf152/Emc9/Fam134b/Pex2/Derl2	17
CC	GO:0030176	integral component of endoplasmic reticulum membrane	10/490	94/16924	0.00038759	0.011319	Scd1/Tm7sf2/Elovl6/Dhcr7/Insig1/Tecr/Lrit1/Emc9/Fam134b/Derl2	10
CC	GO:0005778	peroxisomal membrane	7/490	48/16924	0.00043025	0.011319	Pnpla8/Mgst1/Cat/Pex13/Pecr/Pex2/Pex6	7
CC	GO:0031903	microbody membrane	7/490	48/16924	0.00043025	0.011319	Pnpla8/Mgst1/Cat/Pex13/Pecr/Pex2/Pex6	7
CC	GO:0031227	intrinsic component of endoplasmic reticulum membrane	10/490	99/16924	0.00058745	0.0143506	Scd1/Tm7sf2/Elovl6/Dhcr7/Insig1/Tecr/Lrit1/Emc9/Fam134b/Derl2	10
CC	GO:0005791	rough endoplasmic reticulum	8/490	70/16924	0.000912	0.0201428	Pcsk9/Ngfr/Pebp1/Tmem97/Srpr/Arl6ip1/Edn1/Lrat	8
CC	GO:0005789	endoplasmic reticulum membrane	22/490	363/16924	0.00094235	0.0201428	Scd1/Tm7sf2/Elovl6/Ebp/Dhcr7/Insig1/Tecr/Cyp3a11/Aadac/Lrit1/Ugt3a1/Cml1/Selk/Srpr/Tmem147/Arl6ip1/Emc9/Fam134b/Cept1/Svip/Cyb5r3/Derl2	22
CC	GO:0044432	endoplasmic reticulum part	25/490	449/16924	0.00145124	0.0291955	Scd1/Tm7sf2/Dbi/Elovl6/Ebp/Dhcr7/Insig1/Tecr/Cyp3a11/Aadac/Lrit1/Ugt3a1/Cml1/Selk/Srpr/Tmem147/Arl6ip1/Emc9/Fam134b/Cept1/H2-Q10/Edn1/Svip/Cyb5r3/Derl2	25
CC	GO:0042175	nuclear outer membrane-endoplasmic reticulum membrane network	22/490	378/16924	0.00158213	0.0300604	Scd1/Tm7sf2/Elovl6/Ebp/Dhcr7/Insig1/Tecr/Cyp3a11/Aadac/Lrit1/Ugt3a1/Cml1/Selk/Srpr/Tmem147/Arl6ip1/Emc9/Fam134b/Cept1/Svip/Cyb5r3/Derl2	22
CC	GO:0000407	pre-autophagosomal structure	5/490	33/16924	0.00242056	0.04357	Gabarapl1/Atg14/Atg13/Pik3c3/Wdr45	5
MF	GO:0048037	cofactor binding	36/476	257/16606	2.74e-15	2.24e-12	Gclc/Sqle/Dbi/Ugdh/Me1/Cbs/Thnsl2/Qdpr/Kynu/Adh4/Ddc/Pygl/Aox1/Tat/Hibadh/Gldc/Aox3/Idh1/Csad/Srr/Agxt/Aspdh/Mdh1/Srd5a1/Dhcr24/Cat/Tgds/Scp2/Oat/Suox/Fmo4/Cbr3/Acly/Mocos/Glud1/Cyb5r3	36
MF	GO:0016614	oxidoreductase activity, acting on CH-OH group of donors	25/476	140/16606	2.04e-13	8.34e-11	Rdh11/Nsdhl/Ugdh/Me1/Sdr9c7/Htatip2/Adh4/Fam213b/Aox1/Hibadh/Bmp2/L2hgdh/Aox3/Idh1/Akr7a5/Akr1c13/Mdh1/Dhcr24/Akr1c14/Akr1c6/Hsd17b7/Hsd17b2/Akr1c12/Cbr3/Rdh7	25
MF	GO:0020037	heme binding	23/476	129/16606	1.97e-12	5.36e-10	Cyp2c29/Cyp51/Cbs/Nr1d1/Cyp2c67/Cyb5b/Cyp2c38/Cyp26b1/Cyp27a1/Cyp2j5/Cyp2r1/Cyp2c55/Cyp4f14/Cyp1a2/Cyp3a11/Cyp2f2/Cyp2c44/Cat/Suox/Cyp2c70/Pgrmc1/Hebp1/Cyp4b1	23
MF	GO:0046906	tetrapyrrole binding	23/476	137/16606	7.23e-12	1.48e-09	Cyp2c29/Cyp51/Cbs/Nr1d1/Cyp2c67/Cyb5b/Cyp2c38/Cyp26b1/Cyp27a1/Cyp2j5/Cyp2r1/Cyp2c55/Cyp4f14/Cyp1a2/Cyp3a11/Cyp2f2/Cyp2c44/Cat/Suox/Cyp2c70/Pgrmc1/Hebp1/Cyp4b1	23
MF	GO:0016616	oxidoreductase activity, acting on the CH-OH group of donors, NAD or NADP as acceptor	21/476	114/16606	9.49e-12	1.55e-09	Rdh11/Nsdhl/Ugdh/Me1/Sdr9c7/Htatip2/Adh4/Fam213b/Hibadh/Bmp2/Idh1/Akr7a5/Akr1c13/Mdh1/Akr1c14/Akr1c6/Hsd17b7/Hsd17b2/Akr1c12/Cbr3/Rdh7	21
MF	GO:0004497	monooxygenase activity	20/476	123/16606	3.11e-10	4.22e-08	Cyp2c29/Sqle/Cyp51/Msmo1/Cyp2c67/Cyp2c38/Cyp26b1/Cyp27a1/Cyp2j5/Cyp2r1/Pcbd1/Cyp2c55/Cyp4f14/Cyp1a2/Cyp3a11/Cyp2f2/Cyp2c44/Cyp2c70/Fmo4/Cyp4b1	20
MF	GO:0016765	transferase activity, transferring alkyl or aryl (other than methyl) groups	14/476	56/16606	4.03e-10	4.7e-08	Fdft1/Gstm1/Gstm7/Gstm3/Gstm6/Gstm4/Gstm2/Fdps/Gstp1/Mmab/Mgst1/Gstt1/Rabggtb/Sec14l2	14
MF	GO:0005506	iron ion binding	21/476	147/16606	1.31e-09	1.34e-07	Cyp2c29/Scd1/Cyp51/Msmo1/Sc5d/Cyp2c38/Cyp26b1/Cyp27a1/Aox1/Cyp2j5/Cyp2r1/Cyp2c55/Cyp4f14/Cyp1a2/Ethe1/Haao/Cyp3a11/Aox3/Cyp2f2/Cyp2c70/Cyp4b1	21
MF	GO:0050662	coenzyme binding	23/476	186/16606	3.82e-09	3.47e-07	Gclc/Sqle/Dbi/Ugdh/Me1/Qdpr/Adh4/Aox1/Hibadh/Aox3/Idh1/Aspdh/Mdh1/Srd5a1/Dhcr24/Cat/Tgds/Scp2/Suox/Fmo4/Cbr3/Glud1/Cyb5r3	23
MF	GO:0030170	pyridoxal phosphate binding	12/476	50/16606	1.21e-08	9.87e-07	Cbs/Thnsl2/Kynu/Ddc/Pygl/Tat/Gldc/Csad/Srr/Agxt/Oat/Mocos	12
MF	GO:0016712	oxidoreductase activity, acting on paired donors, with incorporation or reduction of molecular oxygen, reduced flavin or flavoprotein as one donor, and incorporation of one atom of oxygen	12/476	53/16606	2.46e-08	1.82e-06	Cyp2c29/Cyp2c67/Cyp2c38/Cyp2j5/Cyp2r1/Cyp2c55/Cyp1a2/Cyp3a11/Cyp2f2/Cyp2c44/Cyp2c70/Cyp4b1	12
MF	GO:0016705	oxidoreductase activity, acting on paired donors, with incorporation or reduction of molecular oxygen	22/476	193/16606	3.75e-08	2.55e-06	Cyp2c29/Scd1/Sqle/Cyp51/Msmo1/Sc5d/Cyp2c67/Cyp2c38/Cyp26b1/Cyp27a1/Cyp2j5/Cyp2r1/Pcbd1/Cyp2c55/Cyp4f14/Cyp1a2/Cyp3a11/Cyp2f2/Cyp2c44/Cyp2c70/Fmo4/Cyp4b1	22
MF	GO:0004364	glutathione transferase activity	9/476	29/16606	7.28e-08	4.57e-06	Gstm1/Gstm7/Gstm3/Gstm6/Gstm4/Gstm2/Gstp1/Mgst1/Gstt1	9
MF	GO:0043177	organic acid binding	20/476	187/16606	4.44e-07	2.59e-05	Gclc/Hmgcs1/Fabp1/Thnsl2/Acacb/Acaca/Ddc/Cyp26b1/Pygl/Cyp4f14/Tat/Gldc/Gnmt/Srr/Agxt/Scp2/Hrsp12/Otc/Glud1/Lrat	20
MF	GO:0051287	NAD binding	11/476	57/16606	5.36e-07	2.92e-05	Ugdh/Me1/Qdpr/Adh4/Aox1/Hibadh/Aox3/Idh1/Mdh1/Glud1/Cyb5r3	11
MF	GO:0019825	oxygen binding	11/476	58/16606	6.45e-07	3.29e-05	Cyp2c29/Cbs/Cyp2c67/Cyp2c38/Cyp2j5/Cyp2r1/Cyp2c55/Haao/Cyp2f2/Cyp2c44/Cyp2c70	11
MF	GO:0070330	aromatase activity	8/476	30/16606	1.44e-06	6.93e-05	Cyp2c29/Cyp2c38/Cyp2j5/Cyp2c55/Cyp1a2/Cyp3a11/Cyp2c70/Cyp4b1	8
MF	GO:0008395	steroid hydroxylase activity	11/476	63/16606	1.53e-06	6.95e-05	Cyp2c29/Cyp2c67/Cyp2c38/Cyp27a1/Cyp2j5/Cyp2r1/Cyp2c55/Cyp3a11/Cyp2f2/Cyp2c44/Cyp2c70	11
MF	GO:0031406	carboxylic acid binding	19/476	186/16606	1.73e-06	7.43e-05	Gclc/Fabp1/Thnsl2/Acacb/Acaca/Ddc/Cyp26b1/Pygl/Cyp4f14/Tat/Gldc/Gnmt/Srr/Agxt/Scp2/Hrsp12/Otc/Glud1/Lrat	19
MF	GO:0016229	steroid dehydrogenase activity	9/476	45/16606	4.29e-06	0.00017486	Nsdhl/Sdr9c7/Htatip2/Akr1c13/Srd5a1/Akr1c14/Akr1c6/Hsd17b7/Hsd17b2	9
MF	GO:0008391	arachidonic acid monooxygenase activity	9/476	47/16606	6.26e-06	0.00024338	Cyp2c29/Cyp2c67/Cyp2c38/Cyp2j5/Cyp2c55/Cyp4f14/Cyp2f2/Cyp2c44/Cyp2c70	9
MF	GO:0004033	aldo-keto reductase (NADP) activity	8/476	37/16606	7.98e-06	0.00029602	Rdh11/Sdr9c7/Htatip2/Adh4/Akr7a5/Akr1c13/Akr1c6/Akr1c12	8
MF	GO:0050661	NADP binding	8/476	38/16606	9.86e-06	0.00034974	Me1/Qdpr/Idh1/Aspdh/Srd5a1/Cat/Fmo4/Cbr3	8
MF	GO:0033764	steroid dehydrogenase activity, acting on the CH-OH group of donors, NAD or NADP as acceptor	8/476	40/16606	1.47e-05	0.00050122	Nsdhl/Sdr9c7/Htatip2/Akr1c13/Akr1c14/Akr1c6/Hsd17b7/Hsd17b2	8
MF	GO:0008392	arachidonic acid epoxygenase activity	8/476	45/16606	3.64e-05	0.00118941	Cyp2c29/Cyp2c67/Cyp2c38/Cyp2j5/Cyp2c55/Cyp2f2/Cyp2c44/Cyp2c70	8
MF	GO:0008106	alcohol dehydrogenase (NADP+) activity	7/476	34/16606	4.18e-05	0.00128715	Rdh11/Sdr9c7/Htatip2/Adh4/Akr7a5/Akr1c13/Akr1c6	7
MF	GO:0033293	monocarboxylic acid binding	9/476	59/16606	4.26e-05	0.00128715	Fabp1/Acacb/Acaca/Cyp26b1/Pygl/Cyp4f14/Scp2/Hrsp12/Lrat	9
MF	GO:0033218	amide binding	19/476	236/16606	5.25e-05	0.00149777	Acacb/Acaca/Gstm7/Gstm4/Gstm2/Ghr/Ngfr/Gstp1/Gnmt/Mgst1/Galr3/Srd5a1/Dhcr24/Pex13/Enpep/Ide/Agtr1a/H2-Q10/Col4a3bp	19
MF	GO:0016627	oxidoreductase activity, acting on the CH-CH group of donors	10/476	75/16606	5.32e-05	0.00149777	Tm7sf2/Sdr9c7/Htatip2/Dhcr7/Tecr/Akr1c13/Srd5a1/Dhcr24/Akr1c6/Pecr	10
MF	GO:0043295	glutathione binding	5/476	16/16606	6.37e-05	0.00162502	Gstm7/Gstm4/Gstm2/Gstp1/Mgst1	5
MF	GO:1900750	oligopeptide binding	5/476	16/16606	6.37e-05	0.00162502	Gstm7/Gstm4/Gstm2/Gstp1/Mgst1	5
MF	GO:0042562	hormone binding	9/476	62/16606	6.37e-05	0.00162502	Cdh13/Ttr/Ghr/Adipor2/Galr3/Serpina7/Ide/Agtr1a/Nr3c2	9
MF	GO:0016709	oxidoreductase activity, acting on paired donors, with incorporation or reduction of molecular oxygen, NAD(P)H as one donor, and incorporation of one atom of oxygen	7/476	40/16606	0.00012491	0.00308865	Sqle/Cyp51/Msmo1/Cyp27a1/Cyp2r1/Cyp4f14/Fmo4	7
MF	GO:0004032	alditol:NADP+ 1-oxidoreductase activity	6/476	30/16606	0.00017771	0.00426492	Sdr9c7/Htatip2/Adh4/Akr7a5/Akr1c13/Akr1c6	6
MF	GO:0016829	lyase activity	15/476	180/16606	0.00021758	0.0050728	Me1/Cbs/Thnsl2/Car14/Glo1/Mvd/Ddc/Pcbd1/Gldc/Csad/Srr/Acmsd/Paics/Tgds/Car8	15
MF	GO:0072341	modified amino acid binding	8/476	58/16606	0.00023397	0.00530336	Cbs/Gstm7/Gstm4/Gstm2/Gstp1/Nox4/Gnmt/Mgst1	8
MF	GO:0016831	carboxy-lyase activity	6/476	32/16606	0.00025836	0.00569783	Me1/Mvd/Ddc/Csad/Acmsd/Paics	6
MF	GO:0016597	amino acid binding	10/476	95/16606	0.00038988	0.00837219	Gclc/Thnsl2/Ddc/Tat/Gldc/Gnmt/Srr/Agxt/Otc/Glud1	10
MF	GO:1901681	sulfur compound binding	16/476	215/16606	0.00048729	0.0101956	Dbi/Cbs/Acacb/Lipc/Acaca/Col5a3/Rspo3/Fgfrl1/Gstm7/Gstm4/Gstm2/Fgfr4/Gstp1/Mgst1/Scp2/Col13a1	16
MF	GO:0071813	lipoprotein particle binding	5/476	24/16606	0.00051286	0.0102072	Lipc/Apoa2/Cdh13/Pcsk9/Pon1	5
MF	GO:0071814	protein-lipid complex binding	5/476	24/16606	0.00051286	0.0102072	Lipc/Apoa2/Cdh13/Pcsk9/Pon1	5
MF	GO:0016769	transferase activity, transferring nitrogenous groups	5/476	25/16606	0.00062611	0.0121645	Tat/Agxt/Oat/Amt/Gatm	5
MF	GO:0016628	oxidoreductase activity, acting on the CH-CH group of donors, NAD or NADP as acceptor	5/476	26/16606	0.00075711	0.0140409	Tm7sf2/Dhcr7/Srd5a1/Dhcr24/Pecr	5
MF	GO:0033765	steroid dehydrogenase activity, acting on the CH-CH group of donors	5/476	26/16606	0.00075711	0.0140409	Sdr9c7/Htatip2/Akr1c13/Srd5a1/Akr1c6	5
MF	GO:0004448	isocitrate dehydrogenase activity	5/476	27/16606	0.00090752	0.0163593	Sdr9c7/Htatip2/Idh1/Akr1c13/Akr1c6	5
MF	GO:0004745	retinol dehydrogenase activity	4/476	16/16606	0.00092221	0.0163593	Sdr9c7/Adh4/Bmp2/Rdh7	4
MF	GO:0016830	carbon-carbon lyase activity	6/476	46/16606	0.0019042	0.0330602	Me1/Mvd/Ddc/Csad/Acmsd/Paics	6
MF	GO:0005496	steroid binding	8/476	80/16606	0.00204616	0.0347847	Stard4/Fabp1/Gstm1/Pygl/Apoa2/Scp2/Nr3c2/Pgrmc1	8
MF	GO:0016746	transferase activity, transferring acyl groups	15/476	225/16606	0.00217361	0.0353845	Keg1/Hmgcs1/Acat2/Elovl6/Lipc/Chac2/Cml1/Scp2/Baat/Gnpnat1/Acat3/Supt3/Acly/Nat2/Lrat	15
MF	GO:0004551	nucleotide diphosphatase activity	4/476	20/16606	0.00224185	0.0353845	Nudt7/Nudt2/Nudt4/Enpp3	4
MF	GO:0016209	antioxidant activity	7/476	65/16606	0.00252273	0.0353845	Fabp1/Mgst1/Trp53inp1/Cat/Gstt1/Sod1/Sepw1	7
MF	GO:0042277	peptide binding	14/476	211/16606	0.00314343	0.0353845	Gstm7/Gstm4/Gstm2/Ghr/Ngfr/Gstp1/Mgst1/Galr3/Dhcr24/Pex13/Enpep/Ide/Agtr1a/H2-Q10	14
MF	GO:0000252	C-3 sterol dehydrogenase (C-4 sterol decarboxylase) activity	4/476	22/16606	0.00323492	0.0353845	Sdr9c7/Htatip2/Akr1c13/Akr1c6	4
MF	GO:0004495	mevaldate reductase activity	4/476	22/16606	0.00323492	0.0353845	Sdr9c7/Htatip2/Akr1c13/Akr1c6	4
MF	GO:0008875	gluconate dehydrogenase activity	4/476	22/16606	0.00323492	0.0353845	Sdr9c7/Htatip2/Akr1c13/Akr1c6	4
MF	GO:0015347	sodium-independent organic anion transmembrane transporter activity	4/476	22/16606	0.00323492	0.0353845	Slc22a30/Slco1b2/Slc22a28/Slco1a1	4
MF	GO:0018451	epoxide dehydrogenase activity	4/476	22/16606	0.00323492	0.0353845	Sdr9c7/Htatip2/Akr1c13/Akr1c6	4
MF	GO:0018452	5-exo-hydroxycamphor dehydrogenase activity	4/476	22/16606	0.00323492	0.0353845	Sdr9c7/Htatip2/Akr1c13/Akr1c6	4
MF	GO:0018453	2-hydroxytetrahydrofuran dehydrogenase activity	4/476	22/16606	0.00323492	0.0353845	Sdr9c7/Htatip2/Akr1c13/Akr1c6	4
MF	GO:0019152	acetoin dehydrogenase activity	4/476	22/16606	0.00323492	0.0353845	Sdr9c7/Htatip2/Akr1c13/Akr1c6	4
MF	GO:0032442	phenylcoumaran benzylic ether reductase activity	4/476	22/16606	0.00323492	0.0353845	Sdr9c7/Htatip2/Akr1c13/Akr1c6	4
MF	GO:0032866	D-xylose:NADP reductase activity	4/476	22/16606	0.00323492	0.0353845	Sdr9c7/Htatip2/Akr1c13/Akr1c6	4
MF	GO:0032867	L-arabinose:NADP reductase activity	4/476	22/16606	0.00323492	0.0353845	Sdr9c7/Htatip2/Akr1c13/Akr1c6	4
MF	GO:0033709	D-arabinitol dehydrogenase, D-ribulose forming (NADP+) activity	4/476	22/16606	0.00323492	0.0353845	Sdr9c7/Htatip2/Akr1c13/Akr1c6	4
MF	GO:0034831	(R)-(-)-1,2,3,4-tetrahydronaphthol dehydrogenase activity	4/476	22/16606	0.00323492	0.0353845	Sdr9c7/Htatip2/Akr1c13/Akr1c6	4
MF	GO:0034840	3-hydroxymenthone dehydrogenase activity	4/476	22/16606	0.00323492	0.0353845	Sdr9c7/Htatip2/Akr1c13/Akr1c6	4
MF	GO:0035380	very long-chain-3-hydroxyacyl-CoA dehydrogenase activity	4/476	22/16606	0.00323492	0.0353845	Sdr9c7/Htatip2/Akr1c13/Akr1c6	4
MF	GO:0043713	(R)-2-hydroxyisocaproate dehydrogenase activity	4/476	22/16606	0.00323492	0.0353845	Sdr9c7/Htatip2/Akr1c13/Akr1c6	4
MF	GO:0044103	L-arabinose 1-dehydrogenase (NADP+) activity	4/476	22/16606	0.00323492	0.0353845	Sdr9c7/Htatip2/Akr1c13/Akr1c6	4
MF	GO:0044105	L-xylulose reductase (NAD+) activity	4/476	22/16606	0.00323492	0.0353845	Sdr9c7/Htatip2/Akr1c13/Akr1c6	4
MF	GO:0048258	3-ketoglucose-reductase activity	4/476	22/16606	0.00323492	0.0353845	Sdr9c7/Htatip2/Akr1c13/Akr1c6	4
MF	GO:0052677	D-arabinitol dehydrogenase, D-xylulose forming (NADP+) activity	4/476	22/16606	0.00323492	0.0353845	Sdr9c7/Htatip2/Akr1c13/Akr1c6	4
MF	GO:0016903	oxidoreductase activity, acting on the aldehyde or oxo group of donors	6/476	51/16606	0.00324679	0.0353845	Adh4/Aox1/Aldh1a7/Aox3/Aldh7a1/Akr1c6	6
MF	GO:0052689	carboxylic ester hydrolase activity	11/476	146/16606	0.00325141	0.0353845	Rgn/Lipc/Ces1f/Ces2a/Aadac/Pnpla8/Ces1c/Pon1/Baat/Lypla1/Abhd3	11
MF	GO:0004303	estradiol 17-beta-dehydrogenase activity	3/476	11/16606	0.00325225	0.0353845	Akr1c6/Hsd17b7/Hsd17b2	3
MF	GO:0008483	transaminase activity	4/476	23/16606	0.00382844	0.0400513	Tat/Agxt/Oat/Amt	4
MF	GO:0035410	dihydrotestosterone 17-beta-dehydrogenase activity	4/476	23/16606	0.00382844	0.0400513	Sdr9c7/Htatip2/Akr1c13/Akr1c6	4
MF	GO:0051990	(R)-2-hydroxyglutarate dehydrogenase activity	4/476	23/16606	0.00382844	0.0400513	Sdr9c7/Htatip2/Akr1c13/Akr1c6	4
MF	GO:0004622	lysophospholipase activity	3/476	12/16606	0.00424474	0.0432964	Lipc/Pnpla8/Lypla1	3
MF	GO:0019841	retinol binding	3/476	12/16606	0.00424474	0.0432964	Adh4/C8g/Lrat	3

## Sheet: GSvsM0.GOenrich.DOWN
Category	ID	Description	GeneRatio	BgRatio	pvalue	padj	geneID	Count
BP	GO:0001525	angiogenesis	37/492	393/16729	4.54e-10	1.62e-06	Adam8/Id1/Sfrp2/Epha2/Lgals3/C5ar1/Cav1/Itgb2/Hmox1/Camp/Cd36/Ccr2/Tnfrsf12a/Klf4/Ngp/Ptgis/Serpine1/Sema5a/Zc3h12a/Lepr/Adgrb2/Anxa3/Myh9/Loxl2/Lemd3/Klf5/Col4a1/Pf4/Ephb1/Nrp2/Col4a3/Gata6/Adam15/Adora2b/Mfge8/Syk/Plcd1	37
BP	GO:0030198	extracellular matrix organization	24/492	189/16729	1.69e-09	2.24e-06	Sfrp2/Lgals3/Sulf2/Sox9/Col5a2/Spock2/Col4a4/Elf3/Sema5a/Bcl3/Egfl6/Lamb2/Col3a1/Loxl2/Lemd3/Col4a1/Col1a2/Col14a1/Col4a6/Col4a3/Phldb1/Exoc8/Tnfrsf11b/Thsd4	24
BP	GO:0043062	extracellular structure organization	24/492	190/16729	1.89e-09	2.24e-06	Sfrp2/Lgals3/Sulf2/Sox9/Col5a2/Spock2/Col4a4/Elf3/Sema5a/Bcl3/Egfl6/Lamb2/Col3a1/Loxl2/Lemd3/Col4a1/Col1a2/Col14a1/Col4a6/Col4a3/Phldb1/Exoc8/Tnfrsf11b/Thsd4	24
BP	GO:0060326	cell chemotaxis	24/492	202/16729	6.49e-09	5.49e-06	Adam8/Epha2/Cxcl1/Lgals3/Abcc1/Prkcd/C5ar1/Itgb2/Trpm4/Ccr1/Saa3/Itgam/Ccr2/Ano6/Serpine1/Sema5a/Nckap1l/Pf4/Ccl6/S100a8/Ephb1/Pla2g7/Cxcl14/Syk	24
BP	GO:0042060	wound healing	30/492	305/16729	7.71e-09	5.49e-06	Mmp12/F13a1/Flna/Prkcd/Cav1/Myof/Hmox1/Slc11a1/Cd36/Ajuba/Pkm/Pdpn/Bnc1/Ccr2/Tnfrsf12a/Fermt3/Actg1/Ano6/Serpine1/Dcbld2/Tln1/Procr/Evl/Col3a1/Myh9/Anxa8/Pf4/Foxa2/Syk/Map3k1	30
BP	GO:0048514	blood vessel morphogenesis	39/492	479/16729	9.64e-09	5.72e-06	Adam8/Id1/Sfrp2/Epha2/Lgals3/C5ar1/Cav1/Itgb2/Hmox1/Camp/Cd36/Ccr2/Tnfrsf12a/Klf4/Ngp/Ptgis/Serpine1/Sema5a/Zc3h12a/Lepr/Adgrb2/Anxa3/Col3a1/Myh9/Loxl2/Lemd3/Klf5/Col4a1/Pf4/Ephb1/Nrp2/Col4a3/Smo/Gata6/Adam15/Adora2b/Mfge8/Syk/Plcd1	39
BP	GO:0050900	leukocyte migration	25/492	233/16729	2.51e-08	1.28e-05	Adam8/Cxcl1/Lgals3/C5ar1/Itgb2/Trpm4/Ccr1/Itgam/Myo1g/Chst4/Stk10/Ccr2/Ano6/Serpine1/Ptafr/Nckap1l/Kitl/Pf4/S100a8/Gcnt1/Icam1/Il33/Pla2g7/Cxcl14/Syk	25
BP	GO:0006935	chemotaxis	35/492	425/16729	4.28e-08	1.79e-05	Adam8/Epha2/Cxcl1/Ear2/Lgals3/Abcc1/Prkcd/C5ar1/Itgb2/Plxna1/Trpm4/Ccr1/Saa3/Itgam/Sema3c/Ccr2/Ano6/Serpine1/Sema5a/Flrt2/Ptafr/Lamb2/Evl/Nckap1l/Pf4/Gli2/Ccl6/S100a8/Ephb1/Nrp2/Csf1r/Smo/Pla2g7/Cxcl14/Syk	35
BP	GO:0042330	taxis	35/492	426/16729	4.54e-08	1.79e-05	Adam8/Epha2/Cxcl1/Ear2/Lgals3/Abcc1/Prkcd/C5ar1/Itgb2/Plxna1/Trpm4/Ccr1/Saa3/Itgam/Sema3c/Ccr2/Ano6/Serpine1/Sema5a/Flrt2/Ptafr/Lamb2/Evl/Nckap1l/Pf4/Gli2/Ccl6/S100a8/Ephb1/Nrp2/Csf1r/Smo/Pla2g7/Cxcl14/Syk	35
BP	GO:0045765	regulation of angiogenesis	22/492	196/16729	7.81e-08	2.78e-05	Id1/Sfrp2/Epha2/Lgals3/C5ar1/Itgb2/Hmox1/Camp/Cd36/Ccr2/Tnfrsf12a/Klf4/Ngp/Ptgis/Serpine1/Sema5a/Adgrb2/Anxa3/Pf4/Col4a3/Gata6/Adora2b	22
BP	GO:1901342	regulation of vasculature development	22/492	213/16729	3.39e-07	0.00010968	Id1/Sfrp2/Epha2/Lgals3/C5ar1/Itgb2/Hmox1/Camp/Cd36/Ccr2/Tnfrsf12a/Klf4/Ngp/Ptgis/Serpine1/Sema5a/Adgrb2/Anxa3/Pf4/Col4a3/Gata6/Adora2b	22
BP	GO:0070848	response to growth factor	34/492	446/16729	4.17e-07	0.00012376	Id1/Sfrp2/Epha2/Cav1/Myof/Sulf2/Sox9/Ltbp3/Ube2o/Iqgap1/Fos/Gpc3/Kcnd3/4632428N05Rik/Klf4/Serpine1/Ptpn1/Crb2/Col3a1/Lemd3/Gata5/Ier2/Sort1/Nrp2/Ehd4/Chst11/Myo1c/Col1a2/Ski/Gata6/Fbn1/Micall1/Map3k1/Itga3	34
BP	GO:0009617	response to bacterium	29/492	350/16729	5.56e-07	0.00015238	Cxcl1/Prkcd/C5ar1/Cav1/Snca/Camp/Slc11a1/Cd36/Myo1f/Cd300lb/Clec4e/Clec4d/Baiap2/Trib1/Irf5/Serpine1/Zc3h12a/Bcl3/Tnip3/Ptafr/Anxa3/Tnfrsf1b/Pf4/Lyz1/Plcg2/Ncf1/Card9/Ncf2/Syk	29
BP	GO:0002687	positive regulation of leukocyte migration	15/492	108/16729	6.12e-07	0.00015562	Adam8/Cxcl1/Lgals3/C5ar1/Ccr1/Ccr2/Ano6/Serpine1/Ptafr/Nckap1l/Kitl/Pf4/Icam1/Pla2g7/Cxcl14	15
BP	GO:0002685	regulation of leukocyte migration	17/492	141/16729	8.59e-07	0.00020398	Adam8/Cxcl1/Lgals3/C5ar1/Ccr1/Stk10/Ccr2/Ano6/Serpine1/Ptafr/Nckap1l/Kitl/Pf4/Icam1/Il33/Pla2g7/Cxcl14	17
BP	GO:0030595	leukocyte chemotaxis	17/492	143/16729	1.05e-06	0.00023356	Adam8/Cxcl1/Lgals3/C5ar1/Itgb2/Trpm4/Ccr1/Itgam/Ccr2/Ano6/Serpine1/Nckap1l/Pf4/S100a8/Pla2g7/Cxcl14/Syk	17
BP	GO:0030855	epithelial cell differentiation	34/492	468/16729	1.25e-06	0.00026208	Id1/Epha2/Cav1/Foxa3/Anxa1/Sox9/Plaur/Upk1b/Psap/Abcb1b/Myo5a/Klf4/Vim/Ezr/Cdh3/Id3/Evpl/Lamb2/Kitl/Gata5/Ptprs/Shroom3/Klf5/Gli2/Icam1/Trim16/Fosl2/Smo/Krt14/Gata6/Foxa2/Ptprq/Gli1/Map3k1	34
BP	GO:0071363	cellular response to growth factor stimulus	32/492	438/16729	2.29e-06	0.00044768	Id1/Sfrp2/Cav1/Myof/Sulf2/Sox9/Ltbp3/Ube2o/Iqgap1/Fos/Gpc3/Kcnd3/4632428N05Rik/Klf4/Serpine1/Ptpn1/Crb2/Col3a1/Lemd3/Gata5/Sort1/Nrp2/Ehd4/Chst11/Myo1c/Col1a2/Ski/Gata6/Fbn1/Micall1/Map3k1/Itga3	32
BP	GO:0050776	regulation of immune response	34/492	482/16729	2.41e-06	0.00044768	Adam8/Lgals3/C5ar1/Cav1/Rab7b/Trpm4/Hmox1/Ccr1/Kcnn4/Myo1g/Slc11a1/Cd36/Myo1f/Clec4e/Clec4d/Ccr2/4632428N05Rik/Lat2/Ezr/Tnip3/Ptafr/Col3a1/Nckap1l/Themis/Clcf1/Cacnb3/Nfam1/Socs5/Inpp5d/Plcg2/Il33/Adora2b/Card9/Syk	34
BP	GO:0007596	blood coagulation	18/492	169/16729	2.55e-06	0.00044768	F13a1/Flna/Prkcd/Cav1/Cd36/Pdpn/Fermt3/Actg1/Ano6/Serpine1/Tln1/Procr/Evl/Myh9/Anxa8/Pf4/Foxa2/Syk	18
BP	GO:0033627	cell adhesion mediated by integrin	9/492	42/16729	2.87e-06	0.00044768	Epha2/Piezo1/Itga5/Fermt3/Serpine1/Egfl6/Nckap1l/Icam1/Syk	9
BP	GO:0002446	neutrophil mediated immunity	7/492	23/16729	2.97e-06	0.00044768	Cxcl1/Myo1f/Cd300lb/Ptafr/Anxa3/Ncf1/Syk	7
BP	GO:0007599	hemostasis	18/492	171/16729	3.02e-06	0.00044768	F13a1/Flna/Prkcd/Cav1/Cd36/Pdpn/Fermt3/Actg1/Ano6/Serpine1/Tln1/Procr/Evl/Myh9/Anxa8/Pf4/Foxa2/Syk	18
BP	GO:0050817	coagulation	18/492	171/16729	3.02e-06	0.00044768	F13a1/Flna/Prkcd/Cav1/Cd36/Pdpn/Fermt3/Actg1/Ano6/Serpine1/Tln1/Procr/Evl/Myh9/Anxa8/Pf4/Foxa2/Syk	18
BP	GO:0030100	regulation of endocytosis	19/492	189/16729	3.21e-06	0.00045642	Lgals3/Cav1/Snca/Slc11a1/Cd36/Gpc3/Rspo1/Prtn3/Hip1/Abca7/Ano6/Serpine1/Ptpn1/Bicd1/Nckap1l/Snph/Ehd4/Mfge8/Syk	19
BP	GO:0001817	regulation of cytokine production	33/492	468/16729	3.43e-06	0.00046955	Adam8/C5ar1/Sulf2/Rab7b/Anxa1/Trpm4/Hmox1/Adam33/Slc11a1/Cd36/Iqgap1/Clec4e/Ccr2/4632428N05Rik/Klf4/Serpine1/Ezr/Cdh3/Zc3h12a/Bcl3/Ptafr/Nckap1l/Pf4/Tia1/Inpp5d/Il6ra/Trim16/Csf1r/Il33/Gata6/Adora2b/Card9/Syk	33
BP	GO:0030335	positive regulation of cell migration	28/492	365/16729	3.94e-06	0.00051962	Adam8/Cxcl1/Lgals3/Abcc1/C5ar1/Ccr1/Syne2/Sox9/Itga5/Myo1f/Pdpn/Ccr2/Ano6/Serpine1/Sema5a/Ptafr/Anxa3/Nckap1l/Kitl/Pf4/Myo1c/Icam1/Csf1r/Pla2g7/Cxcl14/Fam110c/Gli1/Itga3	28
BP	GO:0006954	inflammatory response	33/492	479/16729	5.62e-06	0.00070533	Adam8/Nfkbiz/Cxcl1/Chil3/Itgb2/Hmox1/Ccr1/Saa3/Itgam/Slc11a1/Il1rn/Chst4/Ccr2/Ptgis/Ano6/Elf3/Serpine1/Ptafr/Tnfrsf1b/Clcf1/Pf4/Il17re/S100a8/Icam1/Csf1r/Il33/Pla2g7/Cybb/Adora2b/Ncf1/Alox5ap/Nrros/Syk	33
BP	GO:0002444	myeloid leukocyte mediated immunity	11/492	70/16729	5.75e-06	0.00070533	Cxcl1/Hmox1/Myo1f/Cd300lb/Ccr2/Lat2/Ptafr/Anxa3/Adora2b/Ncf1/Syk	11
BP	GO:2000147	positive regulation of cell motility	28/492	374/16729	6.26e-06	0.0007428	Adam8/Cxcl1/Lgals3/Abcc1/C5ar1/Ccr1/Syne2/Sox9/Itga5/Myo1f/Pdpn/Ccr2/Ano6/Serpine1/Sema5a/Ptafr/Anxa3/Nckap1l/Kitl/Pf4/Myo1c/Icam1/Csf1r/Pla2g7/Cxcl14/Fam110c/Gli1/Itga3	28
BP	GO:0060627	regulation of vesicle-mediated transport	28/492	380/16729	8.44e-06	0.00096908	Lgals3/Cav1/Anxa1/Snca/Hmox1/Slc11a1/Cd36/Gpc3/Ccr2/Rspo1/Prtn3/Hip1/Abca7/Myo5a/Ano6/Serpine1/Ptpn1/Ezr/Bicd1/Ptafr/Nckap1l/Snph/Ehd4/Pkdcc/Ehd2/Adora2b/Mfge8/Syk	28
BP	GO:0002274	myeloid leukocyte activation	16/492	150/16729	8.98e-06	0.00099889	Prkcd/Ubd/Snca/Hmox1/Slc11a1/Myo1f/Cd300lb/Ccr2/Lat2/Ptafr/Anxa3/Pirb/Ptpre/Il33/Adora2b/Syk	16
BP	GO:0051272	positive regulation of cellular component movement	28/492	383/16729	9.77e-06	0.00104535	Adam8/Cxcl1/Lgals3/Abcc1/C5ar1/Ccr1/Syne2/Sox9/Itga5/Myo1f/Pdpn/Ccr2/Ano6/Serpine1/Sema5a/Ptafr/Anxa3/Nckap1l/Kitl/Pf4/Myo1c/Icam1/Csf1r/Pla2g7/Cxcl14/Fam110c/Gli1/Itga3	28
BP	GO:0007229	integrin-mediated signaling pathway	11/492	74/16729	9.98e-06	0.00104535	Flna/Itgb2/Itgax/Itgam/Itga5/Lama5/Fermt3/Col3a1/Adam15/Syk/Itga3	11
BP	GO:0006801	superoxide metabolic process	9/492	50/16729	1.31e-05	0.00133299	Cxcl1/Prkcd/Cd36/Mpo/Cybb/Ncf1/Nrros/Ncf2/Syk	9
BP	GO:0030510	regulation of BMP signaling pathway	11/492	77/16729	1.47e-05	0.00145782	Sfrp2/Cav1/Ube2o/Gpc3/4632428N05Rik/Crb2/Lemd3/Ski/Gata6/Fbn1/Itga3	11
BP	GO:0040017	positive regulation of locomotion	28/492	393/16729	1.57e-05	0.00151202	Adam8/Cxcl1/Lgals3/Abcc1/C5ar1/Ccr1/Syne2/Sox9/Itga5/Myo1f/Pdpn/Ccr2/Ano6/Serpine1/Sema5a/Ptafr/Anxa3/Nckap1l/Kitl/Pf4/Myo1c/Icam1/Csf1r/Pla2g7/Cxcl14/Fam110c/Gli1/Itga3	28
BP	GO:0002366	leukocyte activation involved in immune response	17/492	175/16729	1.65e-05	0.00154687	Lgals3/Hmox1/Slc11a1/Myo1f/Clec4e/Clec4d/Ccr2/Lat2/Bcl3/Ptafr/Anxa3/Clcf1/Socs5/Plcg2/Icam1/Adora2b/Syk	17
BP	GO:0002768	immune response-regulating cell surface receptor signaling pathway	14/492	124/16729	1.7e-05	0.00155111	Lgals3/C5ar1/Kcnn4/Myo1g/Clec4e/Clec4d/Lat2/Ezr/Nckap1l/Themis/Cacnb3/Nfam1/Plcg2/Syk	14
BP	GO:0045123	cellular extravasation	8/492	40/16729	1.78e-05	0.00157977	Adam8/Itgb2/Itgam/Chst4/Ccr2/Ptafr/Gcnt1/Icam1	8
BP	GO:0097529	myeloid leukocyte migration	14/492	125/16729	1.86e-05	0.00161764	Adam8/Cxcl1/Lgals3/C5ar1/Itgb2/Ccr1/Itgam/Ccr2/Ano6/Serpine1/Nckap1l/S100a8/Pla2g7/Syk	14
BP	GO:0002263	cell activation involved in immune response	17/492	177/16729	1.92e-05	0.00162376	Lgals3/Hmox1/Slc11a1/Myo1f/Clec4e/Clec4d/Ccr2/Lat2/Bcl3/Ptafr/Anxa3/Clcf1/Socs5/Plcg2/Icam1/Adora2b/Syk	17
BP	GO:0015711	organic anion transport	24/492	316/16729	2.27e-05	0.00187947	Abcc1/Prkcd/Anxa1/Abcc5/Snca/Slc4a1/Slc2a1/Kcnn4/Slc11a1/Cd36/Slc38a1/Il1rn/Slc37a2/Slc27a1/Abca7/Slc1a5/Atp10a/Slc16a3/Slc7a8/Atp8b4/Slc6a8/Emb/Atp8b2/Syk	24
BP	GO:0006897	endocytosis	30/492	448/16729	2.57e-05	0.00208142	Lgals3/Cav1/Rab7b/Snca/Myo1g/Slc11a1/Cd36/Lrp2/Gpc3/Ccr2/Rspo1/Prtn3/Hip1/Abca7/Ano6/Serpine1/Ptpn1/Ezr/Bicd1/Anxa3/Myh9/Nckap1l/Snph/Adrbk2/Sort1/Ehd4/Ehd2/Micall1/Mfge8/Syk	30
BP	GO:0002443	leukocyte mediated immunity	21/492	261/16729	3.16e-05	0.00249919	Cxcl1/Prkcd/Trpm4/Hmox1/Myo1g/Slc11a1/Myo1f/Cd300lb/Ccr2/4632428N05Rik/Lat2/Bcl3/Ptafr/Anxa3/Pirb/Clcf1/Inpp5d/Icam1/Adora2b/Ncf1/Syk	21
BP	GO:0045124	regulation of bone resorption	7/492	32/16729	3.24e-05	0.00250817	Adam8/Ltbp3/Car2/Inpp5d/Csf1r/Tnfrsf11b/Syk	7
BP	GO:0090026	positive regulation of monocyte chemotaxis	5/492	14/16729	3.46e-05	0.00262384	Ccr1/Ccr2/Ano6/Serpine1/Pla2g7	5
BP	GO:0002690	positive regulation of leukocyte chemotaxis	10/492	70/16729	3.6e-05	0.00267093	Cxcl1/C5ar1/Ccr1/Ccr2/Ano6/Serpine1/Nckap1l/Pf4/Pla2g7/Cxcl14	10
BP	GO:0071772	response to BMP	14/492	133/16729	3.76e-05	0.00267523	Id1/Sfrp2/Cav1/Ube2o/Gpc3/Kcnd3/4632428N05Rik/Crb2/Lemd3/Gata5/Ski/Gata6/Fbn1/Itga3	14
BP	GO:0071773	cellular response to BMP stimulus	14/492	133/16729	3.76e-05	0.00267523	Id1/Sfrp2/Cav1/Ube2o/Gpc3/Kcnd3/4632428N05Rik/Crb2/Lemd3/Gata5/Ski/Gata6/Fbn1/Itga3	14
BP	GO:0036230	granulocyte activation	6/492	23/16729	4.14e-05	0.00282623	Prkcd/Myo1f/Ccr2/Ptafr/Anxa3/Syk	6
BP	GO:0042554	superoxide anion generation	6/492	23/16729	4.14e-05	0.00282623	Cxcl1/Prkcd/Cybb/Ncf1/Ncf2/Syk	6
BP	GO:0006820	anion transport	30/492	460/16729	4.21e-05	0.00282623	Lgals3/Abcc1/Prkcd/Anxa1/Abcc5/Snca/Slc4a1/Slc2a1/Kcnn4/Slc11a1/Cd36/Slc38a1/Il1rn/Slc37a2/Slc27a1/Abca7/Car2/Slc1a5/Atp10a/Ano6/Slc16a3/Ptafr/Slc7a8/Atp8b4/Slc6a8/Emb/Slc20a1/Slc35e4/Atp8b2/Syk	30
BP	GO:0030099	myeloid cell differentiation	24/492	329/16729	4.35e-05	0.00286726	Adam8/Hba-a1/Hba-a2/Epha2/Hbb-b1/Hbb-b2/Rab7b/Ubd/Ccr1/Itgam/Bpgm/Fos/Gpc3/Prtn3/Car2/Alas2/G6pdx/Myh9/Nckap1l/Kitl/Pirb/Pf4/Inpp5d/Csf1r	24
BP	GO:0048762	mesenchymal cell differentiation	15/492	154/16729	4.99e-05	0.00316991	Sfrp2/Flna/Aldh1a2/Sox9/Plaur/Sema3c/Lama5/Crb2/Loxl2/Kitl/Nrp2/Smo/Phldb1/Foxa2/Adam15	15
BP	GO:1903708	positive regulation of hemopoiesis	15/492	154/16729	4.99e-05	0.00316991	Adam8/Cxcl1/Hbb-b2/Rab7b/Ccr1/Fos/Ccr2/Car2/Nckap1l/Kitl/Pf4/Socs5/Inpp5d/Csf1r/Syk	15
BP	GO:0042742	defense response to bacterium	15/492	156/16729	5.79e-05	0.00361559	Prkcd/C5ar1/Camp/Slc11a1/Cd36/Myo1f/Clec4e/Clec4d/Serpine1/Bcl3/Anxa3/Lyz1/Ncf1/Card9/Syk	15
BP	GO:0014031	mesenchymal cell development	14/492	141/16729	7.16e-05	0.00434314	Sfrp2/Flna/Aldh1a2/Sox9/Sema3c/Lama5/Crb2/Loxl2/Kitl/Nrp2/Smo/Phldb1/Foxa2/Adam15	14
BP	GO:0030502	negative regulation of bone mineralization	5/492	16/16729	7.2e-05	0.00434314	Bcor/Trpm4/Ccr1/Sox9/Ltbp3	5
BP	GO:0031589	cell-substrate adhesion	21/492	277/16729	7.5e-05	0.00435283	Adam8/Msln/Flna/Itgb2/Myo1g/Cd36/Itga5/Ajuba/Spock2/Lama5/Tnfrsf12a/Fermt3/Fbln2/Serpine1/Epdr1/Bcam/Egfl6/Col3a1/Ephb1/Adam15/Itga3	21
BP	GO:0030036	actin cytoskeleton organization	31/492	498/16729	7.51e-05	0.00435283	Id1/Flna/Prkcd/Krt19/Myo1f/Fat1/Baiap2/Actg1/Ptpn1/Ezr/Sema5a/Capg/Tln1/Evl/Myh9/Nckap1l/Shroom3/Pdxp/Synpo/Prkcdbp/Icam1/Arhgef10/Fhl3/Kank4/Csf1r/Fmnl1/Ehd2/Nuak2/Mical2/Spta1/Map3k1	31
BP	GO:0048771	tissue remodeling	14/492	142/16729	7.74e-05	0.00435283	Adam8/Epha2/Cav1/Anxa1/Ltbp3/Sema3c/Ccr2/Ctsk/Car2/Elf3/Inpp5d/Csf1r/Tnfrsf11b/Syk	14
BP	GO:0002764	immune response-regulating signaling pathway	18/492	217/16729	7.76e-05	0.00435283	Adam8/Lgals3/C5ar1/Cav1/Rab7b/Kcnn4/Myo1g/Clec4e/Clec4d/Lat2/Ezr/Tnip3/Nckap1l/Themis/Cacnb3/Nfam1/Plcg2/Syk	18
BP	GO:0048863	stem cell differentiation	19/492	237/16729	7.83e-05	0.00435283	Sfrp2/Flna/Nfya/Aldh1a2/Sox9/Ltbp3/Plaur/Sema3c/Lama5/4632428N05Rik/Crb2/Loxl2/Kitl/Nrp2/Smo/Phldb1/Foxa2/Adam15/Terc	19
BP	GO:0045639	positive regulation of myeloid cell differentiation	10/492	77/16729	8.29e-05	0.00448201	Hbb-b2/Rab7b/Ccr1/Fos/Car2/Nckap1l/Kitl/Pf4/Inpp5d/Csf1r	10
BP	GO:0007178	transmembrane receptor protein serine/threonine kinase signaling pathway	21/492	279/16729	8.31e-05	0.00448201	Id1/Sfrp2/Cav1/Ltbp3/Ube2o/Fos/Gpc3/4632428N05Rik/Vim/Crb2/Inhbe/Col3a1/Lemd3/Chst11/Col1a2/Ski/Trps1/Gata6/Fbn1/Map3k1/Itga3	21
BP	GO:1903409	reactive oxygen species biosynthetic process	10/492	79/16729	0.0001033	0.00546157	Cav1/Itgb2/Klf4/Ptgis/Zc3h12a/Atp2b4/Icam1/Mpo/Cybb/Ncf1	10
BP	GO:0046850	regulation of bone remodeling	7/492	38/16729	0.00010432	0.00546157	Adam8/Ltbp3/Car2/Inpp5d/Csf1r/Tnfrsf11b/Syk	7
BP	GO:0002548	monocyte chemotaxis	6/492	27/16729	0.00010977	0.00558245	Lgals3/Ccr1/Ccr2/Ano6/Serpine1/Pla2g7	6
BP	GO:0018149	peptide cross-linking	6/492	27/16729	0.00010977	0.00558245	F13a1/Anxa1/Spock2/Abca7/Evpl/Col3a1	6
BP	GO:0048864	stem cell development	14/492	147/16729	0.00011251	0.00564136	Sfrp2/Flna/Aldh1a2/Sox9/Sema3c/Lama5/Crb2/Loxl2/Kitl/Nrp2/Smo/Phldb1/Foxa2/Adam15	14
BP	GO:0070371	ERK1 and ERK2 cascade	17/492	204/16729	0.00011519	0.00569549	Epha2/C5ar1/Cav1/Ccr1/Sox9/Abca7/Klf4/Ptpn1/Ezr/Spry4/Clcf1/Prkcdbp/Ephb1/Icam1/Csf1r/Tbc1d10c/Syk	17
BP	GO:0070168	negative regulation of biomineral tissue development	5/492	18/16729	0.00013447	0.00655525	Bcor/Trpm4/Ccr1/Sox9/Ltbp3	5
BP	GO:0009620	response to fungus	6/492	28/16729	0.00013626	0.00655525	Cxcl1/Mpo/Ncf1/Cotl1/Card9/Syk	6
BP	GO:0002062	chondrocyte differentiation	10/492	82/16729	0.00014181	0.00659527	Sfrp2/Sulf2/Sox9/Ltbp3/Loxl2/Gli2/Wnt9a/Chst11/Pkdcc/Trps1	10
BP	GO:0070372	regulation of ERK1 and ERK2 cascade	16/492	188/16729	0.00014234	0.00659527	Epha2/C5ar1/Cav1/Ccr1/Abca7/Klf4/Ptpn1/Ezr/Spry4/Clcf1/Prkcdbp/Ephb1/Icam1/Csf1r/Tbc1d10c/Syk	16
BP	GO:1990266	neutrophil migration	9/492	67/16729	0.0001437	0.00659527	Adam8/Cxcl1/Lgals3/C5ar1/Itgb2/Itgam/Nckap1l/S100a8/Syk	9
BP	GO:0002429	immune response-activating cell surface receptor signaling pathway	12/492	115/16729	0.000145	0.00659527	Lgals3/C5ar1/Kcnn4/Myo1g/Lat2/Ezr/Nckap1l/Themis/Cacnb3/Nfam1/Plcg2/Syk	12
BP	GO:0045453	bone resorption	8/492	53/16729	0.00014636	0.00659527	Adam8/Ltbp3/Ctsk/Car2/Inpp5d/Csf1r/Tnfrsf11b/Syk	8
BP	GO:0045807	positive regulation of endocytosis	12/492	116/16729	0.0001575	0.0070089	Cav1/Snca/Slc11a1/Cd36/Gpc3/Hip1/Abca7/Ano6/Serpine1/Bicd1/Nckap1l/Mfge8	12
BP	GO:0050778	positive regulation of immune response	25/492	381/16729	0.00016531	0.00726537	Adam8/Lgals3/C5ar1/Cav1/Rab7b/Kcnn4/Myo1g/Slc11a1/Cd36/Ccr2/Lat2/Ezr/Tnip3/Ptafr/Nckap1l/Themis/Clcf1/Cacnb3/Nfam1/Socs5/Plcg2/Il33/Adora2b/Card9/Syk	25
BP	GO:0030865	cortical cytoskeleton organization	6/492	29/16729	0.00016758	0.00727522	Ezr/Tln1/Nckap1l/Synpo/Prkcdbp/Ehd2	6
BP	GO:0032330	regulation of chondrocyte differentiation	7/492	41/16729	0.00017222	0.00738666	Sox9/Ltbp3/Loxl2/Gli2/Wnt9a/Pkdcc/Trps1	7
BP	GO:0042119	neutrophil activation	5/492	19/16729	0.00017811	0.00745963	Prkcd/Myo1f/Ptafr/Anxa3/Syk	5
BP	GO:0090025	regulation of monocyte chemotaxis	5/492	19/16729	0.00017811	0.00745963	Ccr1/Ccr2/Ano6/Serpine1/Pla2g7	5
BP	GO:0060485	mesenchyme development	16/492	192/16729	0.0001816	0.00751759	Sfrp2/Flna/Aldh1a2/Sox9/Plaur/Sema3c/Lama5/Crb2/Loxl2/Kitl/Bnc2/Nrp2/Smo/Phldb1/Foxa2/Adam15	16
BP	GO:0007159	leukocyte cell-cell adhesion	26/492	407/16729	0.00018834	0.00764709	Adam8/Lgals3/Cav1/Itgb2/Anxa1/Itgam/Slc11a1/Itga5/Chst4/Stk10/Clec4e/Clec4d/Ccr2/4632428N05Rik/Fermt3/Bcl3/Ptafr/Myh9/Nckap1l/Themis/Socs5/S100a8/Gcnt1/Icam1/Spta1/Syk	26
BP	GO:0006909	phagocytosis	13/492	136/16729	0.00018903	0.00764709	Rab7b/Myo1g/Slc11a1/Cd36/Ccr2/Prtn3/Abca7/Ano6/Anxa3/Myh9/Nckap1l/Mfge8/Syk	13
BP	GO:0048821	erythrocyte development	6/492	30/16729	0.00020431	0.00809384	Hba-a1/Hba-a2/Hbb-b1/Hbb-b2/Bpgm/G6pdx	6
BP	GO:0033631	cell-cell adhesion mediated by integrin	4/492	11/16729	0.00020689	0.00809384	Piezo1/Itga5/Fermt3/Egfl6	4
BP	GO:0048570	notochord morphogenesis	4/492	11/16729	0.00020689	0.00809384	Epha2/Crb2/Gli2/Gli1	4
BP	GO:0002688	regulation of leukocyte chemotaxis	10/492	86/16729	0.00021141	0.00818046	Cxcl1/C5ar1/Ccr1/Ccr2/Ano6/Serpine1/Nckap1l/Pf4/Pla2g7/Cxcl14	10
BP	GO:0072593	reactive oxygen species metabolic process	17/492	215/16729	0.00021692	0.00822454	Cxcl1/Prkcd/Cav1/Itgb2/Snca/Cd36/Klf4/Ptgis/Zc3h12a/Atp2b4/Icam1/Mpo/Cybb/Ncf1/Nrros/Ncf2/Syk	17
BP	GO:0043299	leukocyte degranulation	8/492	56/16729	0.00021716	0.00822454	Hmox1/Myo1f/Ccr2/Lat2/Ptafr/Anxa3/Adora2b/Syk	8
BP	GO:0019221	cytokine-mediated signaling pathway	18/492	236/16729	0.00022362	0.00836676	Cxcl1/Cav1/Ccr1/Csf2rb/Il1rn/Slc27a1/Ccr2/Irf5/Lepr/Tnfrsf1b/Pirb/Pf4/Il17re/Socs5/Il6ra/Csf1r/Il17rd/Syk	18
BP	GO:0045055	regulated secretory pathway	9/492	71/16729	0.00022562	0.00836676	Hmox1/Myo1f/Rab11fip5/Ccr2/Lat2/Ptafr/Anxa3/Adora2b/Syk	9
BP	GO:0033628	regulation of cell adhesion mediated by integrin	6/492	31/16729	0.00024711	0.00906934	Epha2/Piezo1/Fermt3/Serpine1/Nckap1l/Syk	6
BP	GO:0046849	bone remodeling	9/492	72/16729	0.00025125	0.00912718	Adam8/Epha2/Ltbp3/Ctsk/Car2/Inpp5d/Csf1r/Tnfrsf11b/Syk	9
BP	GO:0002237	response to molecule of bacterial origin	17/492	218/16729	0.0002556	0.00919125	Cxcl1/C5ar1/Snca/Slc11a1/Cd36/Cd300lb/Trib1/Irf5/Serpine1/Zc3h12a/Tnip3/Ptafr/Tnfrsf1b/Pf4/Plcg2/Card9/Ncf2	17
BP	GO:1902041	regulation of extrinsic apoptotic signaling pathway via death domain receptors	7/492	44/16729	0.00027205	0.00964768	Sfrp2/Lgals3/Hmox1/Atf3/Serpine1/Icam1/Trps1	7
BP	GO:1902107	positive regulation of leukocyte differentiation	12/492	123/16729	0.00027371	0.00964768	Adam8/Ccr1/Fos/Ccr2/Car2/Nckap1l/Kitl/Pf4/Socs5/Inpp5d/Csf1r/Syk	12
BP	GO:0030168	platelet activation	10/492	89/16729	0.00028071	0.00979725	Flna/Prkcd/Pdpn/Fermt3/Actg1/Tln1/Evl/Myh9/Pf4/Syk	10
BP	GO:0002523	leukocyte migration involved in inflammatory response	4/492	12/16729	0.00030314	0.0103769	Adam8/Itgb2/Itgam/S100a8	4
BP	GO:0060100	positive regulation of phagocytosis, engulfment	4/492	12/16729	0.00030314	0.0103769	Cd36/Abca7/Ano6/Nckap1l	4
BP	GO:0030593	neutrophil chemotaxis	8/492	59/16729	0.00031389	0.0106055	Cxcl1/Lgals3/C5ar1/Itgb2/Itgam/Nckap1l/S100a8/Syk	8
BP	GO:0030509	BMP signaling pathway	12/492	125/16729	0.00031796	0.0106055	Id1/Sfrp2/Cav1/Ube2o/Gpc3/4632428N05Rik/Crb2/Lemd3/Ski/Gata6/Fbn1/Itga3	12
BP	GO:0002521	leukocyte differentiation	26/492	421/16729	0.00031876	0.0106055	Adam8/Epha2/Ubd/Anxa1/Ccr1/Itgam/Clec4e/Fos/Gpc3/Clec4d/Ccr2/Prtn3/Car2/Bcl3/Nckap1l/Kitl/Pirb/Themis/Clcf1/Pf4/Nfam1/Socs5/Inpp5d/Plcg2/Csf1r/Syk	26
BP	GO:0002275	myeloid cell activation involved in immune response	8/492	60/16729	0.00035301	0.0116363	Hmox1/Myo1f/Ccr2/Lat2/Ptafr/Anxa3/Adora2b/Syk	8
BP	GO:0015914	phospholipid transport	7/492	46/16729	0.00036123	0.011798	Abcc1/Prkcd/Kcnn4/Abca7/Atp10a/Atp8b4/Atp8b2	7
BP	GO:0002757	immune response-activating signal transduction	16/492	206/16729	0.0004024	0.0129045	Adam8/Lgals3/C5ar1/Cav1/Rab7b/Kcnn4/Myo1g/Lat2/Ezr/Tnip3/Nckap1l/Themis/Cacnb3/Nfam1/Plcg2/Syk	16
BP	GO:0030324	lung development	15/492	186/16729	0.00040718	0.0129045	Id1/Aldh1a2/Sox9/Ltbp3/Lama5/Pdpn/Gpc3/Cic/Tns3/Gli2/Pkdcc/Gata6/Foxa2/Gli1/Itga3	15
BP	GO:0034097	response to cytokine	27/492	452/16729	0.00041498	0.0129045	Cxcl1/Cav1/Snca/Ccr1/Saa3/Slc11a1/Aldh1a2/Csf2rb/Csf2ra/Il1rn/Slc27a1/Ccr2/Klf4/Irf5/Serpine1/Lepr/Col3a1/Tnfrsf1b/Pirb/Pf4/Il17re/Socs5/Il6ra/Csf1r/Foxa2/Il17rd/Syk	27
BP	GO:0006911	phagocytosis, engulfment	6/492	34/16729	0.00041891	0.0129045	Cd36/Abca7/Ano6/Myh9/Nckap1l/Mfge8	6
BP	GO:0010470	regulation of gastrulation	6/492	34/16729	0.00041891	0.0129045	Sfrp2/Il1rn/Col5a2/Klf4/Phldb1/Foxa2	6
BP	GO:0097035	regulation of membrane lipid distribution	6/492	34/16729	0.00041891	0.0129045	Kcnn4/Abca7/Atp10a/Ano6/Atp8b4/Atp8b2	6
BP	GO:0002693	positive regulation of cellular extravasation	4/492	13/16729	0.00042773	0.0129045	Adam8/Ccr2/Ptafr/Icam1	4
BP	GO:0045019	negative regulation of nitric oxide biosynthetic process	4/492	13/16729	0.00042773	0.0129045	Cav1/Ptgis/Zc3h12a/Atp2b4	4
BP	GO:1904406	negative regulation of nitric oxide metabolic process	4/492	13/16729	0.00042773	0.0129045	Cav1/Ptgis/Zc3h12a/Atp2b4	4
BP	GO:0010035	response to inorganic substance	21/492	317/16729	0.00047691	0.0140741	Cav1/Anxa1/Snca/Hmox1/Crip1/Cd36/Iqgap1/Psap/Fos/Itpr3/Cybrd1/Loxl2/Atp2b4/Hk3/Ucp2/Plcg2/Mpo/Ngb/Lcn2/Alox5ap/Plcd1	21
BP	GO:0032675	regulation of interleukin-6 production	10/492	95/16729	0.00047697	0.0140741	Rab7b/Cd36/Zc3h12a/Ptafr/Nckap1l/Inpp5d/Il6ra/Il33/Adora2b/Card9	10
BP	GO:0010876	lipid localization	20/492	295/16729	0.00048197	0.0140741	Abcc1/Lpl/Prkcd/Cav1/Anxa1/Osbpl3/Kcnn4/Cd36/Slc27a1/Esyt3/Abca7/Atp10a/Ano6/Soat1/Apobr/Zc3h12a/Atp8b4/Atp8b2/Esyt1/Syk	20
BP	GO:0030323	respiratory tube development	15/492	189/16729	0.00048231	0.0140741	Id1/Aldh1a2/Sox9/Ltbp3/Lama5/Pdpn/Gpc3/Cic/Tns3/Gli2/Pkdcc/Gata6/Foxa2/Gli1/Itga3	15
BP	GO:0030199	collagen fibril organization	6/492	35/16729	0.00049317	0.0141704	Sfrp2/Col5a2/Col3a1/Loxl2/Col1a2/Col14a1	6
BP	GO:0050921	positive regulation of chemotaxis	11/492	113/16729	0.00049683	0.0141704	Cxcl1/C5ar1/Ccr1/Ccr2/Ano6/Serpine1/Sema5a/Nckap1l/Pf4/Pla2g7/Cxcl14	11
BP	GO:0090287	regulation of cellular response to growth factor stimulus	16/492	210/16729	0.00049756	0.0141704	Sfrp2/Cav1/Myof/Sulf2/Ube2o/Gpc3/4632428N05Rik/Ptpn1/Crb2/Lemd3/Chst11/Myo1c/Ski/Gata6/Fbn1/Itga3	16
BP	GO:0050818	regulation of coagulation	9/492	79/16729	0.00050685	0.0143204	Prkcd/Cav1/Cd36/Pdpn/Ano6/Serpine1/Procr/Foxa2/Syk	9
BP	GO:0002573	myeloid leukocyte differentiation	14/492	171/16729	0.00054069	0.0151564	Adam8/Epha2/Ubd/Ccr1/Itgam/Fos/Gpc3/Prtn3/Car2/Kitl/Pirb/Pf4/Inpp5d/Csf1r	14
BP	GO:0030866	cortical actin cytoskeleton organization	5/492	24/16729	0.00057658	0.0158969	Ezr/Tln1/Nckap1l/Prkcdbp/Ehd2	5
BP	GO:0060541	respiratory system development	16/492	213/16729	0.00058104	0.0158969	Id1/Aldh1a2/Sox9/Ltbp3/Lama5/Pdpn/Gpc3/Cic/Tns3/Gli2/Pkdcc/Ski/Gata6/Foxa2/Gli1/Itga3	16
BP	GO:0015669	gas transport	4/492	14/16729	0.00058497	0.0158969	Hbb-b1/Hbb-b2/Car2/Ngb	4
BP	GO:0060192	negative regulation of lipase activity	4/492	14/16729	0.00058497	0.0158969	Anxa1/Gm6484/Bicd1/Sort1	4
BP	GO:0032635	interleukin-6 production	10/492	98/16729	0.00061137	0.0163645	Rab7b/Cd36/Zc3h12a/Ptafr/Nckap1l/Inpp5d/Il6ra/Il33/Adora2b/Card9	10
BP	GO:0050851	antigen receptor-mediated signaling pathway	10/492	98/16729	0.00061137	0.0163645	Lgals3/Kcnn4/Lat2/Ezr/Nckap1l/Themis/Cacnb3/Nfam1/Plcg2/Syk	10
BP	GO:0045766	positive regulation of angiogenesis	11/492	116/16729	0.00062092	0.0163881	Sfrp2/Lgals3/C5ar1/Itgb2/Hmox1/Camp/Ptgis/Serpine1/Sema5a/Anxa3/Gata6	11
BP	GO:0032970	regulation of actin filament-based process	20/492	301/16729	0.00062146	0.0163881	Id1/Prkcd/Cav1/Trpm4/Myo1f/Baiap2/Sema5a/Capg/Evl/Myh9/Nckap1l/Kcnj2/Pdxp/Synpo/Icam1/Arhgef10/Kank4/Csf1r/Spta1/Map3k1	20
BP	GO:0018108	peptidyl-tyrosine phosphorylation	19/492	279/16729	0.00062679	0.0164073	Sfrp2/Epha2/Prkcd/Cav1/Itgb2/Cd36/Matk/Itga5/Ptpn1/Kitl/Clcf1/Socs5/Ephb1/Ehd4/Pkdcc/Il6ra/Icam1/Csf1r/Syk	19
BP	GO:0001818	negative regulation of cytokine production	14/492	174/16729	0.00064306	0.0167101	Anxa1/Hmox1/Slc11a1/4632428N05Rik/Klf4/Ezr/Cdh3/Zc3h12a/Bcl3/Nckap1l/Tia1/Inpp5d/Il33/Gata6	14
BP	GO:0006869	lipid transport	18/492	258/16729	0.00065213	0.016823	Abcc1/Prkcd/Cav1/Anxa1/Osbpl3/Kcnn4/Cd36/Slc27a1/Esyt3/Abca7/Atp10a/Ano6/Soat1/Apobr/Atp8b4/Atp8b2/Esyt1/Syk	18
BP	GO:0002286	T cell activation involved in immune response	8/492	66/16729	0.00067958	0.017377	Lgals3/Slc11a1/Clec4e/Clec4d/Ccr2/Bcl3/Socs5/Icam1	8
BP	GO:0018212	peptidyl-tyrosine modification	19/492	281/16729	0.00068337	0.017377	Sfrp2/Epha2/Prkcd/Cav1/Itgb2/Cd36/Matk/Itga5/Ptpn1/Kitl/Clcf1/Socs5/Ephb1/Ehd4/Pkdcc/Il6ra/Icam1/Csf1r/Syk	19
BP	GO:0070527	platelet aggregation	7/492	51/16729	0.00068858	0.0173855	Flna/Prkcd/Fermt3/Actg1/Tln1/Myh9/Syk	7
BP	GO:0043410	positive regulation of MAPK cascade	23/492	374/16729	0.00073651	0.0184645	Adam8/Prkcd/C5ar1/Mst1r/Ccr1/Cd36/Il1rn/Ajuba/Psap/Abca7/Ptpn1/Cdon/Plce1/Lepr/Kitl/Prkcdbp/Map3k6/Il6ra/Icam1/Csf1r/Card9/Syk/Map3k1	23
BP	GO:0034109	homotypic cell-cell adhesion	26/492	446/16729	0.00075735	0.0188542	Adam8/Lgals3/Flna/Prkcd/Cav1/Itgb2/Anxa1/Itgam/Slc11a1/Stk10/Clec4e/Clec4d/Ccr2/4632428N05Rik/Fermt3/Actg1/Bcl3/Tln1/Myh9/Nckap1l/Themis/Socs5/S100a8/Icam1/Spta1/Syk	26
BP	GO:0034103	regulation of tissue remodeling	7/492	52/16729	0.00077586	0.0188716	Adam8/Ltbp3/Car2/Inpp5d/Csf1r/Tnfrsf11b/Syk	7
BP	GO:0002886	regulation of myeloid leukocyte mediated immunity	6/492	38/16729	0.00077859	0.0188716	Cxcl1/Hmox1/Ccr2/Ptafr/Adora2b/Syk	6
BP	GO:0070206	protein trimerization	6/492	38/16729	0.00077859	0.0188716	Col6a1/Col1a2/Ski/Lcn2/Alox5ap/Col6a2	6
BP	GO:0060099	regulation of phagocytosis, engulfment	4/492	15/16729	0.00077925	0.0188716	Cd36/Abca7/Ano6/Nckap1l	4
BP	GO:0097530	granulocyte migration	9/492	84/16729	0.00079671	0.0190925	Adam8/Cxcl1/Lgals3/C5ar1/Itgb2/Itgam/Nckap1l/S100a8/Syk	9
BP	GO:0071559	response to transforming growth factor beta	13/492	158/16729	0.00080628	0.0190925	Cav1/Sox9/Ltbp3/Fos/Serpine1/Col3a1/Lemd3/Chst11/Col1a2/Ski/Fbn1/Map3k1/Itga3	13
BP	GO:0071560	cellular response to transforming growth factor beta stimulus	13/492	158/16729	0.00080628	0.0190925	Cav1/Sox9/Ltbp3/Fos/Serpine1/Col3a1/Lemd3/Chst11/Col1a2/Ski/Fbn1/Map3k1/Itga3	13
BP	GO:0001667	ameboidal-type cell migration	19/492	285/16729	0.00080982	0.0190925	Adam8/Epha2/Itgb2/Syne2/Sox9/Sema3c/Lama5/Klf4/Serpine1/Sema5a/Anxa3/Evl/Myh9/Loxl2/Lemd3/Kitl/Nrp2/Smo/Itga3	19
BP	GO:0008625	extrinsic apoptotic signaling pathway via death domain receptors	8/492	68/16729	0.00083103	0.0194635	Sfrp2/Lgals3/Hmox1/Atf3/Serpine1/Sort1/Icam1/Trps1	8
BP	GO:0072006	nephron development	10/492	102/16729	0.00083784	0.0194949	Sulf2/Sox9/Col4a4/Lama5/Gpc3/Plce1/Lamb2/Col4a3/Smo/Itga3	10
BP	GO:0050878	regulation of body fluid levels	19/492	286/16729	0.00084441	0.0195202	F13a1/Flna/Prkcd/Cav1/Kcnn4/Cd36/Pdpn/Fermt3/Actg1/Ano6/Serpine1/Tln1/Procr/Evl/Myh9/Anxa8/Pf4/Foxa2/Syk	19
BP	GO:0014032	neural crest cell development	7/492	53/16729	0.00087166	0.0198917	Aldh1a2/Sox9/Sema3c/Lama5/Kitl/Nrp2/Smo	7
BP	GO:0045428	regulation of nitric oxide biosynthetic process	7/492	53/16729	0.00087166	0.0198917	Cav1/Itgb2/Klf4/Ptgis/Zc3h12a/Atp2b4/Icam1	7
BP	GO:0002262	myeloid cell homeostasis	12/492	140/16729	0.00088563	0.0200819	Hba-a1/Hba-a2/Hbb-b1/Hbb-b2/Anxa1/Hmox1/Bpgm/Alas2/G6pdx/Nckap1l/Kitl/Inpp5d	12
BP	GO:0001503	ossification	21/492	333/16729	0.00089991	0.0202765	Id1/Sfrp2/Epha2/Bcor/Trpm4/Ccr1/Sox9/Ltbp3/Gpc3/Ano6/Col6a1/Id3/Mn1/Atp6v0a4/Tmem119/Gli2/Sort1/Pkdcc/Smo/Ski/Gli1	21
BP	GO:0051258	protein polymerization	15/492	201/16729	0.00091304	0.0203876	Prkcd/Cav1/Snca/Baiap2/Tubb2b/Capg/Tubb6/Evl/Nckap1l/Icam1/Tppp3/Nin/Tubb2a/Spta1/Map3k1	15
BP	GO:0030279	negative regulation of ossification	8/492	69/16729	0.0009163	0.0203876	Id1/Bcor/Trpm4/Ccr1/Sox9/Ltbp3/Id3/Ski	8
BP	GO:0015748	organophosphate ester transport	8/492	70/16729	0.00100844	0.02184	Abcc1/Prkcd/Kcnn4/Slc37a2/Abca7/Atp10a/Atp8b4/Atp8b2	8
BP	GO:0016525	negative regulation of angiogenesis	8/492	70/16729	0.00100844	0.02184	Cd36/Ccr2/Klf4/Ngp/Serpine1/Adgrb2/Pf4/Col4a3	8
BP	GO:0030903	notochord development	4/492	16/16729	0.001015	0.02184	Epha2/Crb2/Gli2/Gli1	4
BP	GO:0050832	defense response to fungus	4/492	16/16729	0.001015	0.02184	Cxcl1/Mpo/Ncf1/Cotl1	4
BP	GO:1903427	negative regulation of reactive oxygen species biosynthetic process	4/492	16/16729	0.001015	0.02184	Cav1/Ptgis/Zc3h12a/Atp2b4	4
BP	GO:0045880	positive regulation of smoothened signaling pathway	5/492	27/16729	0.00101838	0.02184	Gpc3/Wnt9a/Smo/Foxa2/Gli1	5
BP	GO:0001704	formation of primary germ layer	9/492	87/16729	0.00102734	0.0219002	Sfrp2/Epha2/Itga5/Col5a2/Dusp5/Ets2/Crb2/Gata6/Foxa2	9
BP	GO:0050730	regulation of peptidyl-tyrosine phosphorylation	15/492	204/16729	0.00106118	0.0224674	Sfrp2/Prkcd/Cav1/Itgb2/Cd36/Itga5/Ptpn1/Kitl/Clcf1/Socs5/Ehd4/Il6ra/Icam1/Csf1r/Syk	15
BP	GO:0032846	positive regulation of homeostatic process	12/492	143/16729	0.00106657	0.0224674	Adam8/Cav1/Anxa1/Snca/Trpm4/Ltbp3/Slc27a1/Car2/Nckap1l/Inpp5d/Terc/Syk	12
BP	GO:0061035	regulation of cartilage development	7/492	55/16729	0.0010911	0.022849	Sox9/Ltbp3/Loxl2/Gli2/Wnt9a/Pkdcc/Trps1	7
BP	GO:0002250	adaptive immune response	19/492	293/16729	0.00112398	0.0233999	Prkcd/Trpm4/Myo1g/Slc11a1/Lilrb4a/Clec4d/Ccr2/4632428N05Rik/Lat2/Bcl3/Clec4a2/Pirb/Themis/Clcf1/Socs5/Inpp5d/Icam1/Il33/Syk	19
BP	GO:1904018	positive regulation of vasculature development	11/492	125/16729	0.00115708	0.0239489	Sfrp2/Lgals3/C5ar1/Itgb2/Hmox1/Camp/Ptgis/Serpine1/Sema5a/Anxa3/Gata6	11
BP	GO:0072577	endothelial cell apoptotic process	6/492	41/16729	0.00117724	0.0242253	Ano6/Serpine1/Sema5a/Cd248/Icam1/Col4a3	6
BP	GO:2000377	regulation of reactive oxygen species metabolic process	12/492	145/16729	0.00120348	0.0246179	Cxcl1/Prkcd/Cav1/Itgb2/Snca/Cd36/Klf4/Ptgis/Zc3h12a/Atp2b4/Icam1/Syk	12
BP	GO:0042092	type 2 immune response	5/492	28/16729	0.00121015	0.0246179	Ccr2/Bcl3/Clcf1/Socs5/Il33	5
BP	GO:1903531	negative regulation of secretion by cell	13/492	166/16729	0.00127162	0.0257215	Anxa1/Snca/Hmox1/Il1rn/Rab11fip5/Ccr2/Ezr/Rhbdf2/Npy1r/Ucp2/Midn/Rhbdf1/Il33	13
BP	GO:0045332	phospholipid translocation	4/492	17/16729	0.00129669	0.025789	Kcnn4/Atp10a/Atp8b4/Atp8b2	4
BP	GO:0045780	positive regulation of bone resorption	4/492	17/16729	0.00129669	0.025789	Adam8/Ltbp3/Car2/Syk	4
BP	GO:0046852	positive regulation of bone remodeling	4/492	17/16729	0.00129669	0.025789	Adam8/Ltbp3/Car2/Syk	4
BP	GO:2000181	negative regulation of blood vessel morphogenesis	8/492	73/16729	0.00133008	0.026306	Cd36/Ccr2/Klf4/Ngp/Serpine1/Adgrb2/Pf4/Col4a3	8
BP	GO:0010324	membrane invagination	6/492	42/16729	0.00133987	0.0263532	Cd36/Abca7/Ano6/Myh9/Nckap1l/Mfge8	6
BP	GO:0048872	homeostasis of number of cells	17/492	254/16729	0.00143522	0.0280735	Hba-a1/Hba-a2/Hbb-b1/Hbb-b2/Anxa1/Hmox1/Sox9/Bpgm/Alas2/G6pdx/Nckap1l/Kitl/Pirb/Inpp5d/Col14a1/Smo/Spta1	17
BP	GO:0071621	granulocyte chemotaxis	8/492	74/16729	0.00145375	0.0282806	Cxcl1/Lgals3/C5ar1/Itgb2/Itgam/Nckap1l/S100a8/Syk	8
BP	GO:0061515	myeloid cell development	7/492	58/16729	0.00149903	0.0288845	Hba-a1/Hba-a2/Hbb-b1/Hbb-b2/Itgam/Bpgm/G6pdx	7
BP	GO:0043405	regulation of MAP kinase activity	16/492	233/16729	0.00150562	0.0288845	Adam8/Sfrp2/Prkcd/Cav1/Mst1r/Il1rn/Dusp5/Ajuba/Uchl1/Trib1/Ptpn1/Spry4/Plce1/Kitl/Syk/Map3k1	16
BP	GO:0002064	epithelial cell development	14/492	190/16729	0.00150913	0.0288845	Id1/Epha2/Sox9/Abcb1b/Vim/Ezr/Lamb2/Ptprs/Shroom3/Klf5/Icam1/Fosl2/Smo/Map3k1	14
BP	GO:0007009	plasma membrane organization	17/492	256/16729	0.00156127	0.0297226	Epha2/Prkcd/Cav1/Myof/Tspan5/Lama5/Baiap2/Abca7/Myo5a/Kif13a/Ano6/Ezr/Pkdcc/Ehd2/Spta1/Micall1/Itga3	17
BP	GO:0050764	regulation of phagocytosis	8/492	75/16729	0.00158637	0.0300398	Slc11a1/Cd36/Prtn3/Abca7/Ano6/Nckap1l/Mfge8/Syk	8
BP	GO:0034204	lipid translocation	4/492	18/16729	0.00162876	0.0306792	Kcnn4/Atp10a/Atp8b4/Atp8b2	4
BP	GO:0042035	regulation of cytokine biosynthetic process	9/492	93/16729	0.00165051	0.0307527	Adam33/Ccr2/Klf4/Bcl3/Ptafr/Tia1/Inpp5d/Card9/Syk	9
BP	GO:0014033	neural crest cell differentiation	7/492	59/16729	0.00165857	0.0307527	Aldh1a2/Sox9/Sema3c/Lama5/Kitl/Nrp2/Smo	7
BP	GO:1904035	regulation of epithelial cell apoptotic process	7/492	59/16729	0.00165857	0.0307527	Ano6/Serpine1/Sema5a/Tia1/Sort1/Cd248/Icam1	7
BP	GO:0001655	urogenital system development	17/492	258/16729	0.00169654	0.0307654	Sulf2/Aldh1a2/Sox9/Plaur/Col4a4/Lama5/Psap/Gpc3/Plce1/Lamb2/Col4a1/Gli2/Gcnt1/Col4a3/Smo/Fbn1/Itga3	17
BP	GO:0030042	actin filament depolymerization	6/492	44/16729	0.00171599	0.0307654	Sema5a/Capg/Evl/Pdxp/Mical2/Spta1	6
BP	GO:0048565	digestive tract development	10/492	112/16729	0.0017166	0.0307654	Sfrp2/Aldh1a2/Col3a1/Gata5/Klf5/Gli2/Pkdcc/Smo/Trps1/Gata6	10
BP	GO:0032103	positive regulation of response to external stimulus	16/492	236/16729	0.0017172	0.0307654	Adam8/Cxcl1/C5ar1/Ccr1/Ccr2/Ano6/Serpine1/Sema5a/Nckap1l/Pf4/S100a8/Il33/Pla2g7/Cxcl14/Adora2b/Alox5ap	16
BP	GO:0007015	actin filament organization	18/492	281/16729	0.0017209	0.0307654	Id1/Flna/Prkcd/Fat1/Baiap2/Ezr/Sema5a/Capg/Evl/Nckap1l/Pdxp/Synpo/Icam1/Arhgef10/Kank4/Mical2/Spta1/Map3k1	18
BP	GO:0030193	regulation of blood coagulation	8/492	76/16729	0.00172839	0.0307654	Prkcd/Cav1/Cd36/Pdpn/Ano6/Serpine1/Foxa2/Syk	8
BP	GO:1900046	regulation of hemostasis	8/492	76/16729	0.00172839	0.0307654	Prkcd/Cav1/Cd36/Pdpn/Ano6/Serpine1/Foxa2/Syk	8
BP	GO:1901343	negative regulation of vasculature development	8/492	76/16729	0.00172839	0.0307654	Cd36/Ccr2/Klf4/Ngp/Serpine1/Adgrb2/Pf4/Col4a3	8
BP	GO:0097191	extrinsic apoptotic signaling pathway	15/492	215/16729	0.00178958	0.031696	Sfrp2/Lgals3/Cav1/Hmox1/Atf3/Tnfrsf12a/Serpine1/Tnfrsf1b/Kitl/Pf4/Sort1/Icam1/Il33/Trps1/Lcn2	15
BP	GO:0048520	positive regulation of behavior	11/492	132/16729	0.0017985	0.0316963	Cxcl1/C5ar1/Ccr1/Ccr2/Ano6/Serpine1/Sema5a/Nckap1l/Pf4/Pla2g7/Cxcl14	11
BP	GO:0030500	regulation of bone mineralization	7/492	60/16729	0.001831	0.0319528	Bcor/Trpm4/Ccr1/Sox9/Ltbp3/Ano6/Pkdcc	7
BP	GO:0032755	positive regulation of interleukin-6 production	7/492	60/16729	0.001831	0.0319528	Rab7b/Cd36/Ptafr/Il6ra/Il33/Adora2b/Card9	7
BP	GO:0007369	gastrulation	12/492	153/16729	0.00190501	0.0330821	Sfrp2/Epha2/Itga5/Il1rn/Col5a2/Dusp5/Ets2/Klf4/Crb2/Phldb1/Gata6/Foxa2	12
BP	GO:0071900	regulation of protein serine/threonine kinase activity	21/492	354/16729	0.00191775	0.0331417	Adam8/Sfrp2/Prkcd/Cav1/Snca/Mst1r/Il1rn/Dusp5/Ajuba/Iqgap1/Slc27a1/Uchl1/Trib1/Ptpn1/Spry4/Plce1/Atp2b4/Kitl/Csf1r/Syk/Map3k1	21
BP	GO:0021955	central nervous system neuron axonogenesis	5/492	31/16729	0.00194597	0.033306	Tsku/Cdh11/Gli2/Ephb1/Arhgef28	5
BP	GO:0071827	plasma lipoprotein particle organization	5/492	31/16729	0.00194597	0.033306	Lpl/Abca7/Soat1/Mpo/Pla2g7	5
BP	GO:0002691	regulation of cellular extravasation	4/492	19/16729	0.0020156	0.0337117	Adam8/Ccr2/Ptafr/Icam1	4
BP	GO:0014002	astrocyte development	4/492	19/16729	0.0020156	0.0337117	Vim/Lamb2/S100a8/Smo	4
BP	GO:0032331	negative regulation of chondrocyte differentiation	4/492	19/16729	0.0020156	0.0337117	Sox9/Ltbp3/Gli2/Wnt9a	4
BP	GO:0032958	inositol phosphate biosynthetic process	4/492	19/16729	0.0020156	0.0337117	Snca/Ptafr/Plcg2/Plcd1	4
BP	GO:0006809	nitric oxide biosynthetic process	7/492	61/16729	0.00201702	0.0337117	Cav1/Itgb2/Klf4/Ptgis/Zc3h12a/Atp2b4/Icam1	7
BP	GO:0051346	negative regulation of hydrolase activity	20/492	332/16729	0.00203595	0.0338691	Sfrp2/Anxa1/Snca/Gm6484/Plaur/Gpc3/Abca7/Klf4/Ngp/Itih5/Serpine1/Bicd1/Crb2/Lepr/Pi16/Nckap1l/Hspa1b/Sort1/Wnt9a/Sh3rf2	20
BP	GO:0034101	erythrocyte homeostasis	10/492	115/16729	0.00209168	0.0346344	Hba-a1/Hba-a2/Hbb-b1/Hbb-b2/Hmox1/Bpgm/Alas2/G6pdx/Nckap1l/Inpp5d	10
BP	GO:1904019	epithelial cell apoptotic process	8/492	79/16729	0.00221553	0.0363764	Ano6/Serpine1/Sema5a/Tia1/Sort1/Cd248/Icam1/Col4a3	8
BP	GO:0043407	negative regulation of MAP kinase activity	7/492	62/16729	0.00221733	0.0363764	Sfrp2/Prkcd/Cav1/Dusp5/Uchl1/Ptpn1/Spry4	7
BP	GO:0072001	renal system development	15/492	220/16729	0.00223787	0.036545	Sulf2/Aldh1a2/Sox9/Col4a4/Lama5/Gpc3/Plce1/Lamb2/Col4a1/Gli2/Gcnt1/Col4a3/Smo/Fbn1/Itga3	15
BP	GO:1903034	regulation of response to wounding	20/492	335/16729	0.0022603	0.0367429	Adam8/Prkcd/Cav1/Cd36/Pdpn/Ccr2/Tnfrsf12a/Xylt1/Klf4/Ptgis/Ano6/Serpine1/Tnfrsf1b/Clcf1/S100a8/Il33/Foxa2/Adora2b/Alox5ap/Syk	20
BP	GO:0007169	transmembrane receptor protein tyrosine kinase signaling pathway	25/492	457/16729	0.00227183	0.0367624	Epha2/Dok2/Prkcd/Myof/Sulf2/Snca/Sox9/Plaur/Matk/Iqgap1/Baiap2/Ptpn1/Rhbdf2/Cdh3/Ptpre/Rhbdf1/Socs5/Sort1/Ephb1/Igfbp6/Nrp2/Myo1c/Csf1r/Ncoa5/Syk	25
BP	GO:0001819	positive regulation of cytokine production	19/492	312/16729	0.00230972	0.0372063	Adam8/C5ar1/Sulf2/Rab7b/Slc11a1/Cd36/Clec4e/Ccr2/Serpine1/Bcl3/Ptafr/Pf4/Il6ra/Trim16/Csf1r/Il33/Adora2b/Card9/Syk	19
BP	GO:0071345	cellular response to cytokine stimulus	21/492	361/16729	0.00242463	0.038835	Cxcl1/Cav1/Ccr1/Saa3/Csf2rb/Csf2ra/Il1rn/Slc27a1/Ccr2/Irf5/Serpine1/Lepr/Tnfrsf1b/Pirb/Pf4/Il17re/Socs5/Il6ra/Csf1r/Il17rd/Syk	21
BP	GO:0050830	defense response to Gram-positive bacterium	7/492	63/16729	0.00243264	0.038835	C5ar1/Camp/Cd36/Myo1f/Lyz1/Ncf1/Card9	7
BP	GO:0032496	response to lipopolysaccharide	14/492	201/16729	0.00254861	0.0405047	Cxcl1/Snca/Slc11a1/Cd36/Cd300lb/Trib1/Serpine1/Zc3h12a/Tnip3/Ptafr/Tnfrsf1b/Pf4/Plcg2/Ncf2	14
BP	GO:0006739	NADP metabolic process	5/492	33/16729	0.00259027	0.0405341	Fmo2/Kcnab2/G6pdx/Ncf1/Ncf2	5
BP	GO:0030513	positive regulation of BMP signaling pathway	5/492	33/16729	0.00259027	0.0405341	Ube2o/Gpc3/4632428N05Rik/Crb2/Gata6	5
BP	GO:0046173	polyol biosynthetic process	5/492	33/16729	0.00259027	0.0405341	Snca/Ptafr/Plcg2/Isyna1/Plcd1	5
BP	GO:0030316	osteoclast differentiation	8/492	81/16729	0.002596	0.0405341	Adam8/Epha2/Ccr1/Fos/Gpc3/Car2/Inpp5d/Csf1r	8
BP	GO:0034599	cellular response to oxidative stress	13/492	180/16729	0.0026165	0.0406758	Prkcd/Anxa1/Snca/Hmox1/Cd36/Psap/Fos/Sfpq/G6pdx/Hk3/Mpo/Ngb/Lcn2	13
BP	GO:0008589	regulation of smoothened signaling pathway	7/492	64/16729	0.0026637	0.040874	Gpc3/Gli2/Wnt9a/Glis2/Smo/Foxa2/Gli1	7
BP	GO:0070167	regulation of biomineral tissue development	7/492	64/16729	0.0026637	0.040874	Bcor/Trpm4/Ccr1/Sox9/Ltbp3/Ano6/Pkdcc	7
BP	GO:1903426	regulation of reactive oxygen species biosynthetic process	7/492	64/16729	0.0026637	0.040874	Cav1/Itgb2/Klf4/Ptgis/Zc3h12a/Atp2b4/Icam1	7
BP	GO:0002285	lymphocyte activation involved in immune response	10/492	120/16729	0.00286127	0.043524	Lgals3/Slc11a1/Clec4e/Clec4d/Ccr2/Bcl3/Clcf1/Socs5/Plcg2/Icam1	10
BP	GO:0021954	central nervous system neuron development	7/492	65/16729	0.00291123	0.043524	Tsku/Cdh11/Gli2/Ephb1/Nrp2/Arhgef28/Btg2	7
BP	GO:0046209	nitric oxide metabolic process	7/492	65/16729	0.00291123	0.043524	Cav1/Itgb2/Klf4/Ptgis/Zc3h12a/Atp2b4/Icam1	7
BP	GO:0001755	neural crest cell migration	5/492	34/16729	0.00296464	0.043524	Sema3c/Lama5/Kitl/Nrp2/Smo	5
BP	GO:0042088	T-helper 1 type immune response	5/492	34/16729	0.00296464	0.043524	Slc11a1/Ccr2/Bcl3/Socs5/Il33	5
BP	GO:0071825	protein-lipid complex subunit organization	5/492	34/16729	0.00296464	0.043524	Lpl/Abca7/Soat1/Mpo/Pla2g7	5
BP	GO:1901031	regulation of response to reactive oxygen species	5/492	34/16729	0.00296464	0.043524	Snca/Cd36/Psap/Hk3/Ngb	5
BP	GO:0002825	regulation of T-helper 1 type immune response	4/492	21/16729	0.00297088	0.043524	Slc11a1/Ccr2/Socs5/Il33	4
BP	GO:0002888	positive regulation of myeloid leukocyte mediated immunity	4/492	21/16729	0.00297088	0.043524	Cxcl1/Ptafr/Adora2b/Syk	4
BP	GO:0010742	macrophage derived foam cell differentiation	4/492	21/16729	0.00297088	0.043524	Lpl/Cd36/Soat1/Pf4	4
BP	GO:0045730	respiratory burst	4/492	21/16729	0.00297088	0.043524	Slc11a1/Mpo/Cybb/Ncf1	4
BP	GO:0002763	positive regulation of myeloid leukocyte differentiation	6/492	49/16729	0.00300473	0.0438395	Ccr1/Fos/Car2/Kitl/Pf4/Csf1r	6
BP	GO:0090092	regulation of transmembrane receptor protein serine/threonine kinase signaling pathway	13/492	184/16729	0.00316474	0.0459857	Sfrp2/Cav1/Ube2o/Gpc3/4632428N05Rik/Crb2/Inhbe/Lemd3/Chst11/Ski/Gata6/Fbn1/Itga3	13
BP	GO:0032956	regulation of actin cytoskeleton organization	16/492	251/16729	0.00318554	0.0459901	Id1/Prkcd/Myo1f/Baiap2/Sema5a/Capg/Evl/Nckap1l/Pdxp/Synpo/Icam1/Arhgef10/Kank4/Csf1r/Spta1/Map3k1	16
BP	GO:0008154	actin polymerization or depolymerization	11/492	142/16729	0.00319088	0.0459901	Prkcd/Baiap2/Sema5a/Capg/Evl/Nckap1l/Pdxp/Icam1/Mical2/Spta1/Map3k1	11
BP	GO:0043588	skin development	14/492	207/16729	0.003328	0.0477729	Epha2/Anxa1/Sox9/Col5a2/Lama5/Myo5a/Cdh3/Evpl/Col3a1/Col1a2/Trim16/Fosl2/Smo/Itga3	14
BP	GO:0033003	regulation of mast cell activation	5/492	35/16729	0.00337656	0.0480821	Hmox1/Cd300lb/Ptpre/Adora2b/Syk	5
BP	GO:0043300	regulation of leukocyte degranulation	5/492	35/16729	0.00337656	0.0480821	Hmox1/Ccr2/Ptafr/Adora2b/Syk	5
BP	GO:0055123	digestive system development	10/492	123/16729	0.00342197	0.0485347	Sfrp2/Aldh1a2/Col3a1/Gata5/Klf5/Gli2/Pkdcc/Smo/Trps1/Gata6	10
BP	GO:0002253	activation of immune response	16/492	253/16729	0.00344291	0.0486378	Adam8/Lgals3/C5ar1/Cav1/Rab7b/Kcnn4/Myo1g/Lat2/Ezr/Tnip3/Nckap1l/Themis/Cacnb3/Nfam1/Plcg2/Syk	16
BP	GO:0060191	regulation of lipase activity	7/492	67/16729	0.00345878	0.0486378	Anxa1/Snca/Gm6484/Bicd1/Ptafr/Sort1/Plcd1	7
BP	GO:0032844	regulation of homeostatic process	20/492	348/16729	0.00348864	0.0486378	Adam8/Hbb-b2/Cav1/Anxa1/Snca/Trpm4/Ltbp3/Slc27a1/Car2/Nckap1l/Kitl/Ucp2/Tpcn2/Inpp5d/Plcg2/Csf1r/Foxa2/Tnfrsf11b/Terc/Syk	20
BP	GO:0021936	regulation of cerebellar granule cell precursor proliferation	3/492	11/16729	0.00349755	0.0486378	Gli2/Smo/Gli1	3
BP	GO:0032957	inositol trisphosphate metabolic process	3/492	11/16729	0.00349755	0.0486378	Ptafr/Plcg2/Plcd1	3
BP	GO:0002828	regulation of type 2 immune response	4/492	22/16729	0.00354775	0.0489001	Ccr2/Clcf1/Socs5/Il33	4
BP	GO:0090077	foam cell differentiation	4/492	22/16729	0.00354775	0.0489001	Lpl/Cd36/Soat1/Pf4	4
BP	GO:0046942	carboxylic acid transport	15/492	231/16729	0.00355762	0.0489001	Abcc1/Prkcd/Anxa1/Snca/Slc11a1/Cd36/Slc38a1/Il1rn/Slc27a1/Slc1a5/Slc16a3/Slc7a8/Slc6a8/Emb/Syk	15
CC	GO:0031012	extracellular matrix	39/503	364/16924	4.08e-12	1.39e-09	Mmp12/Lgals3/Lpl/Snca/Wisp2/Ltbp3/Emilin2/Col5a2/Spock2/Pkm/Col4a4/Lama5/Aebp1/Podn/Gpc3/Prtn3/Col6a1/Fbln2/Adamtsl5/Serpine1/Cpz/Egfl6/Lamb2/Col3a1/Loxl2/Adamtsl1/Col6a5/Col4a1/Wnt9a/Col1a2/Col14a1/Col4a6/Fmod/Col4a3/Fbn1/Tnfrsf11b/Thsd4/Mfge8/Col6a2	39
CC	GO:0005578	proteinaceous extracellular matrix	33/503	309/16924	2.11e-10	3.58e-08	Mmp12/Lgals3/Snca/Wisp2/Ltbp3/Emilin2/Col5a2/Spock2/Col4a4/Lama5/Podn/Gpc3/Col6a1/Fbln2/Adamtsl5/Cpz/Egfl6/Lamb2/Col3a1/Loxl2/Adamtsl1/Col6a5/Col4a1/Wnt9a/Col1a2/Col14a1/Col4a6/Fmod/Col4a3/Fbn1/Tnfrsf11b/Thsd4/Col6a2	33
CC	GO:0098644	complex of collagen trimers	7/503	19/16924	7.26e-07	8.23e-05	Col5a2/Col4a4/Col3a1/Col4a1/Col1a2/Col4a6/Col4a3	7
CC	GO:0045121	membrane raft	25/503	292/16924	2.27e-06	0.0001928	Ahnak/Cav1/Itgb2/Myof/Hmox1/Slc2a1/Kcnn4/Cd36/Lrp2/Slc27a1/Kcnd3/Lat2/Ptgis/Ezr/Tnfrsf1b/Nfam1/Prkcdbp/Ephb1/Cbl/Myo1c/Icam1/Smo/Ehd2/Arid3a/Plcd1	25
CC	GO:0005581	collagen trimer	12/503	79/16924	3.49e-06	0.0002031	Emilin2/Col5a2/Col4a4/Col6a1/Col3a1/Col6a5/Col4a1/Col1a2/Col14a1/Col4a6/Col4a3/Col6a2	12
CC	GO:0044853	plasma membrane raft	13/503	93/16924	3.58e-06	0.0002031	Cav1/Myof/Hmox1/Slc2a1/Cd36/Slc27a1/Kcnd3/Ptgis/Ezr/Prkcdbp/Cbl/Smo/Ehd2	13
CC	GO:0044420	extracellular matrix component	15/503	127/16924	5.56e-06	0.00027001	Snca/Col5a2/Col4a4/Lama5/Adamtsl5/Egfl6/Lamb2/Col3a1/Loxl2/Col4a1/Col1a2/Col4a6/Col4a3/Fbn1/Thsd4	15
CC	GO:0005901	caveola	12/503	85/16924	7.64e-06	0.00032454	Cav1/Myof/Hmox1/Slc2a1/Cd36/Slc27a1/Kcnd3/Ptgis/Prkcdbp/Cbl/Smo/Ehd2	12
CC	GO:0005912	adherens junction	28/503	406/16924	3.43e-05	0.00129398	Fam129b/Epha2/Ahnak/Flna/Cav1/Anxa1/Syne2/Plaur/Itga5/Ajuba/Iqgap1/Fat1/Vim/Ezr/Cdh3/Spry4/Tln1/Flrt2/Procr/Evl/Myh9/Shroom3/Tns3/Icam1/Fhl3/Sntb2/Afap1/Itga3	28
CC	GO:0005925	focal adhesion	25/503	347/16924	4.42e-05	0.00150389	Epha2/Ahnak/Flna/Cav1/Anxa1/Syne2/Plaur/Itga5/Ajuba/Iqgap1/Fat1/Vim/Ezr/Spry4/Tln1/Flrt2/Procr/Evl/Myh9/Tns3/Icam1/Fhl3/Sntb2/Afap1/Itga3	25
CC	GO:0005924	cell-substrate adherens junction	25/503	351/16924	5.33e-05	0.00155646	Epha2/Ahnak/Flna/Cav1/Anxa1/Syne2/Plaur/Itga5/Ajuba/Iqgap1/Fat1/Vim/Ezr/Spry4/Tln1/Flrt2/Procr/Evl/Myh9/Tns3/Icam1/Fhl3/Sntb2/Afap1/Itga3	25
CC	GO:0015629	actin cytoskeleton	27/503	395/16924	5.49e-05	0.00155646	Adam8/Fam129b/Ahnak/Flna/Snca/Mst1r/Slc2a1/Krt19/Myo1g/Myo1f/Iqgap1/Fermt3/Baiap2/Actg1/Myo5a/Ezr/Slc16a3/Myh9/Pdxp/Synpo/Inpp5d/Myo1c/Fhl3/Ncoa5/Afap1/Spta1/Map3k1	27
CC	GO:0070161	anchoring junction	28/503	421/16924	6.48e-05	0.00162726	Fam129b/Epha2/Ahnak/Flna/Cav1/Anxa1/Syne2/Plaur/Itga5/Ajuba/Iqgap1/Fat1/Vim/Ezr/Cdh3/Spry4/Tln1/Flrt2/Procr/Evl/Myh9/Shroom3/Tns3/Icam1/Fhl3/Sntb2/Afap1/Itga3	28
CC	GO:0030055	cell-substrate junction	25/503	356/16924	6.7e-05	0.00162726	Epha2/Ahnak/Flna/Cav1/Anxa1/Syne2/Plaur/Itga5/Ajuba/Iqgap1/Fat1/Vim/Ezr/Spry4/Tln1/Flrt2/Procr/Evl/Myh9/Tns3/Icam1/Fhl3/Sntb2/Afap1/Itga3	25
CC	GO:0008305	integrin complex	6/503	30/16924	0.00021635	0.00459737	Itgb2/Itgax/Itgam/Itga5/Myh9/Itga3	6
CC	GO:0098636	protein complex involved in cell adhesion	6/503	30/16924	0.00021635	0.00459737	Itgb2/Itgax/Itgam/Itga5/Myh9/Itga3	6
CC	GO:0031252	cell leading edge	21/503	301/16924	0.00027557	0.0055113	Epha2/Myo1g/Syne2/S100a6/Itga5/Ajuba/Iqgap1/Fat1/Pdpn/Tnfrsf12a/Abca7/Myo5a/Vim/Ezr/Tln1/Evl/Myh9/Ptpn13/Pdxp/Mcf2l/Arhgap44	21
CC	GO:0030175	filopodium	9/503	75/16924	0.00037062	0.00700058	Myo1g/Syne2/Fat1/Pdpn/Myo5a/Ezr/Ephb1/Tbc1d10c/Itga3	9
CC	GO:0043205	fibril	4/503	14/16924	0.00060873	0.0107081	Snca/Adamtsl5/Fbn1/Thsd4	4
CC	GO:0044448	cell cortex part	11/503	115/16924	0.00062989	0.0107081	Flna/Slc4a1/Slc2a1/Krt19/Myo1f/Myh9/Gypc/Inpp5d/Phldb1/Exoc8/Spta1	11
CC	GO:0005884	actin filament	9/503	82/16924	0.00072013	0.0111293	Flna/Myo1f/Actg1/Myo5a/Ezr/Inpp5d/Myo1c/Afap1/Map3k1	9
CC	GO:0030863	cortical cytoskeleton	9/503	82/16924	0.00072013	0.0111293	Flna/Slc4a1/Slc2a1/Krt19/Myo1f/Myh9/Gypc/Inpp5d/Spta1	9
CC	GO:0001726	ruffle	11/503	121/16924	0.00096414	0.0136787	S100a6/Itga5/Iqgap1/Pdpn/Tnfrsf12a/Abca7/Myo5a/Ezr/Tln1/Myh9/Pdxp	11
CC	GO:0005938	cell cortex	15/503	200/16924	0.00096555	0.0136787	Flna/Cav1/Snca/Slc4a1/Slc2a1/Krt19/Myo1f/Myh9/Gypc/Inpp5d/Cytip/Phldb1/Fam110c/Exoc8/Spta1	15
CC	GO:0045335	phagocytic vesicle	6/503	46/16924	0.00228513	0.0310778	Adam8/Rab7b/Slc11a1/Anxa3/Fmnl1/Syk	6
CC	GO:0005604	basement membrane	9/503	98/16924	0.00254917	0.0333353	Col4a4/Lama5/Egfl6/Lamb2/Loxl2/Col4a1/Col4a6/Col4a3/Fbn1	9
CC	GO:0001527	microfibril	3/503	11/16924	0.00360334	0.0453754	Adamtsl5/Fbn1/Thsd4	3
CC	GO:0008076	voltage-gated potassium channel complex	7/503	68/16924	0.00398403	0.0483776	Kcnc4/Cntnap1/Kcnd3/Kcnab2/Kcnab1/Kcnj2/Kcnt2	7
CC	GO:0000323	lytic vacuole	22/503	402/16924	0.00457955	0.0484165	Adam8/Ahnak/Rab7b/Anxa1/Slc11a1/Lrp2/Tm6sf1/Tcirg1/Psap/Gpc3/Myo5a/Ctsk/Col6a1/Epdr1/Atp6v0a4/Gusb/Tmem165/Ctsj/Sort1/Tpcn2/Mpo/Mfsd12	22
CC	GO:0005764	lysosome	22/503	402/16924	0.00457955	0.0484165	Adam8/Ahnak/Rab7b/Anxa1/Slc11a1/Lrp2/Tm6sf1/Tcirg1/Psap/Gpc3/Myo5a/Ctsk/Col6a1/Epdr1/Atp6v0a4/Gusb/Tmem165/Ctsj/Sort1/Tpcn2/Mpo/Mfsd12	22
CC	GO:0034705	potassium channel complex	7/503	70/16924	0.00468351	0.0484165	Kcnc4/Cntnap1/Kcnd3/Kcnab2/Kcnab1/Kcnj2/Kcnt2	7
CC	GO:0005583	fibrillar collagen trimer	3/503	12/16924	0.00469925	0.0484165	Col5a2/Col3a1/Col1a2	3
CC	GO:0098643	banded collagen fibril	3/503	12/16924	0.00469925	0.0484165	Col5a2/Col3a1/Col1a2	3
MF	GO:0005178	integrin binding	17/486	94/16606	1.69e-09	1.24e-06	Adam8/Wisp2/Itga5/Lama5/Fermt3/Gpnmb/Tln1/Egfl6/Lamb2/Col3a1/Icam1/Col4a3/Fbn1/Adam15/Mfge8/Syk/Itga3	17
MF	GO:0050839	cell adhesion molecule binding	19/486	164/16606	3.41e-07	0.00012515	Adam8/Itgb2/Wisp2/Itga5/Lama5/Fermt3/Gpnmb/Ezr/Tln1/Egfl6/Lamb2/Col3a1/Icam1/Col4a3/Fbn1/Adam15/Mfge8/Syk/Itga3	19
MF	GO:0005201	extracellular matrix structural constituent	7/486	28/16606	1.22e-05	0.00263158	Col5a2/Col4a4/Col3a1/Col4a1/Col1a2/Col4a3/Fbn1	7
MF	GO:0019838	growth factor binding	14/486	124/16606	1.61e-05	0.00263158	Wisp2/Cd36/Ltbp3/Il1rn/Col6a1/Col3a1/Pdxp/Col4a1/Sort1/Igfbp6/Il6ra/Col1a2/Trim16/Crim1	14
MF	GO:0005543	phospholipid binding	24/486	313/16606	1.79e-05	0.00263158	Myof/Anxa1/Snca/Myo1g/Iqgap1/Esyt3/Agap1/Itpr3/Hip1/Ptafr/Anxa3/Kcnj2/Anxa8/Adap1/Mcf2l/Myo1c/Arhgap44/Pla2g7/Esyt1/Exoc8/Ncf1/Micall1/Mfge8/Plcd1	24
MF	GO:0019955	cytokine binding	10/486	80/16606	0.00011044	0.0126826	Ccr1/Cd36/Ltbp3/Csf2ra/Il1rn/Ccr2/Plp2/Il6ra/Trim16/Csf1r	10
MF	GO:0003779	actin binding	24/486	353/16606	0.00012079	0.0126826	Flna/Slc4a1/Myo1g/Syne2/Myo1f/Ajuba/Hip1/Myo5a/Ezr/Capg/Tln1/Evl/Myh9/Anxa8/Shroom3/Synpo/Myo1c/Fhl3/Sntb2/Fmnl1/Afap1/Mical2/Spta1/Cotl1	24
MF	GO:0005198	structural molecule activity	26/486	411/16606	0.00020312	0.0186618	Ahnak/Cav1/Anxa1/Krt19/Cldn14/Col5a2/Cldn15/Col4a4/Krt7/Actg1/Mbp/Tubb2b/Vim/Tln1/Tubb6/Evpl/Col3a1/Col4a1/Col1a2/Sntb2/Col4a6/Col4a3/Krt80/Krt14/Fbn1/Tubb2a	26
MF	GO:0044548	S100 protein binding	4/486	12/16606	0.00029751	0.0218669	Ahnak/S100a6/Iqgap1/Ezr	4
MF	GO:0048407	platelet-derived growth factor binding	4/486	12/16606	0.00029751	0.0218669	Col6a1/Col3a1/Col4a1/Col1a2	4
MF	GO:0004629	phospholipase C activity	5/486	23/16606	0.00045727	0.0292004	Ccr1/Plce1/Pde12/Plcg2/Plcd1	5
MF	GO:0043492	ATPase activity, coupled to movement of substances	11/486	113/16606	0.00047674	0.0292004	Abcc1/Atp1a3/Abcc5/Tcirg1/Abcb1b/Abca7/Atp10a/Atp6v0a4/Atp2b4/Atp8b4/Atp8b2	11

## Sheet: GSvsM0.KEGGenrich.UP
Category	ID	Description	GeneRatio	BgRatio	pvalue	padj	geneID	Count
KEGG	mmu01100	Metabolic pathways	107/228	1106/5208	7.56156e-19	1.16448e-16	Cyp2c29/Idi1/Pmvk/Tm7sf2/Gclc/Sqle/Rdh11/Nsdhl/Cyp51/Hmgcs1/Ugdh/Acss2/Acat2/Msmo1/Me1/Fdft1/Cbs/Qdpr/Sc5d/Ebp/Acacb/Lipc/Kynu/Lss/Mvd/Acaca/Adh4/Mvk/Coasy/Ddc/Dhcr7/Cyp2c38/Cyp27a1/Pi4k2b/Aox1/Cyp2j5/Cyp2r1/Aldh1a7/Cyp2c55/Cyp4f14/Cyp1a2/Tat/Haao/9130409I23Rik/Cyp3a11/Hibadh/Gldc/Ugt2b36/Sgms2/Pcyt2/Ugt2b5/Idh1/Fdps/Gbe1/Ndufa4/Csad/Mmab/Comt/Atp5j/Acmsd/Agxt/Cyp2c44/Mdh1/Dhcr24/Cat/Paics/St3gal…	107
KEGG	mmu00100	Steroid biosynthesis	13/228	18/5208	1.09487e-14	8.4305e-13	Tm7sf2/Sqle/Nsdhl/Cyp51/Msmo1/Fdft1/Sc5d/Ebp/Lss/Dhcr7/Cyp2r1/Dhcr24/Hsd17b7	13
KEGG	mmu00980	Metabolism of xenobiotics by cytochrome P450	20/228	71/5208	9.05981e-12	4.6507e-10	Cyp2c29/Adh4/Gstm1/Cyp2c38/Gstm7/Cyp2c55/Cyp1a2/Cyp3a11/Gstm3/Gstm6/Ugt2b36/Gstm4/Gstm2/Ugt2b5/Cyp2f2/Gstp1/Mgst1/Cyp2c44/Gstt1/Cyp2c70	20
KEGG	mmu00982	Drug metabolism - cytochrome P450	21/228	81/5208	1.55327e-11	5.98009e-10	Cyp2c29/Adh4/Gstm1/Cyp2c38/Aox1/Gstm7/Cyp2c55/Cyp1a2/Cyp3a11/Gstm3/Gstm6/Ugt2b36/Gstm4/Gstm2/Ugt2b5/Gstp1/Mgst1/Cyp2c44/Gstt1/Cyp2c70/Fmo4	21
KEGG	mmu00480	Glutathione metabolism	13/228	53/5208	2.73125e-07	8.41224e-06	Gclc/Gstm1/Gstm7/Gstm3/Gstm6/Gstm4/Gstm2/Idh1/Gstp1/Mgst1/Gstt1/Lap3/Gclm	13
KEGG	mmu00900	Terpenoid backbone biosynthesis	7/228	14/5208	7.42563e-07	1.55873e-05	Idi1/Pmvk/Hmgcs1/Acat2/Mvd/Mvk/Fdps	7
KEGG	mmu00830	Retinol metabolism	14/228	67/5208	7.88506e-07	1.55873e-05	Cyp2c29/Rdh11/Adh4/Cyp2c38/Cyp26b1/Aldh1a7/Cyp2c55/Cyp1a2/Cyp3a11/Ugt2b36/Ugt2b5/Cyp2c44/Cyp2c70/Lrat	14
KEGG	mmu00260	Glycine, serine and threonine metabolism	10/228	33/5208	8.09732e-07	1.55873e-05	Cbs/Gldc/Gnmt/Gcat/Srr/Agxt/Aldh7a1/Amt/Gatm/Pipox	10
KEGG	mmu04146	Peroxisome	14/228	79/5208	6.26712e-06	0.000107237	Pmvk/Mvk/Idh1/Agxt/Cat/Pex13/Scp2/Acsl5/Baat/Sod1/Pecr/Pipox/Pex2/Pex6	14
KEGG	mmu00640	Propanoate metabolism	8/228	31/5208	3.92733e-05	0.000539267	Acss2/Acat2/Acacb/Acaca/Aldh7a1/Pcca/Mcee/Acss3	8
KEGG	mmu00591	Linoleic acid metabolism	9/228	40/5208	4.20208e-05	0.000539267	Cyp2c29/Cyp2c38/Cyp2j5/Cyp2c55/Cyp1a2/Cyp3a11/Cyp2c44/Akr1c6/Cyp2c70	9
KEGG	mmu00620	Pyruvate metabolism	9/228	40/5208	4.20208e-05	0.000539267	Acss2/Acat2/Me1/Acacb/Glo1/Acaca/Hagh/Mdh1/Aldh7a1	9
KEGG	mmu00380	Tryptophan metabolism	9/228	43/5208	7.72519e-05	0.000915138	Acat2/Kynu/Ddc/Aox1/Cyp1a2/Haao/Acmsd/Cat/Aldh7a1	9
KEGG	mmu03320	PPAR signaling pathway	11/228	73/5208	0.000286426	0.00315069	Scd1/Dbi/Me1/Fabp1/Ubc/Cyp27a1/Apoa2/Apoc3/Scp2/Acsl5/Rxrg	11
KEGG	mmu00630	Glyoxylate and dicarboxylate metabolism	5/228	18/5208	0.000825434	0.00847446	Acat2/Mdh1/Pcca/Mcee/Hyi	5
KEGG	mmu00140	Steroid hormone biosynthesis	7/228	47/5208	0.00395553	0.0360896	Cyp3a11/Ugt2b36/Ugt2b5/Comt/Srd5a1/Hsd17b7/Hsd17b2	7
KEGG	mmu01040	Biosynthesis of unsaturated fatty acids	5/228	25/5208	0.00398391	0.0360896	Scd1/Elovl6/Tecr/Baat/Pecr	5
KEGG	mmu00280	Valine, leucine and isoleucine degradation	7/228	49/5208	0.00501689	0.0429223	Hmgcs1/Acat2/Aox1/Hibadh/Aldh7a1/Pcca/Mcee	7

## Sheet: GSvsM0.KEGGenrich.DOWN
Category	ID	Description	GeneRatio	BgRatio	pvalue	padj	geneID	Count
KEGG	mmu04512	ECM-receptor interaction	14/185	84/5208	1.11571e-06	0.000158431	Cd36/Itga5/Col5a2/Col4a4/Lama5/Sv2a/Col6a1/Lamb2/Col3a1/Col4a1/Col1a2/Col4a6/Col6a2/Itga3	14
KEGG	mmu04974	Protein digestion and absorption	13/185	77/5208	2.35454e-06	0.000167173	Atp1a3/Kcnn4/Col5a2/Col4a4/Slc1a5/Col6a1/Col3a1/Col4a1/Slc7a8/Col1a2/Col14a1/Col4a6/Col6a2	13
KEGG	mmu04145	Phagosome	16/185	159/5208	0.000141799	0.00671182	Itgb2/Rab7b/Itgam/Cd36/Itga5/Tcirg1/Actg1/Tubb2b/Atp6v0a4/Tubb6/Atp6v0d2/Mpo/Tubb2a/Cybb/Ncf1/Ncf2	16
KEGG	mmu05146	Amoebiasis	12/185	104/5208	0.000279274	0.00991422	Itgb2/Rab7b/Itgam/Col5a2/Col4a4/Lama5/Lamb2/Col3a1/Col4a1/Col1a2/Col4a6/Pik3r5	12
KEGG	mmu04670	Leukocyte transendothelial migration	12/185	111/5208	0.000512722	0.0124648	Itgb2/Itgam/Cldn14/Cldn15/Actg1/Ezr/Plcg2/Icam1/Pik3r5/Cybb/Ncf1/Ncf2	12
KEGG	mmu04510	Focal adhesion	17/185	196/5208	0.000526681	0.0124648	Flna/Cav1/Itga5/Col5a2/Col4a4/Lama5/Actg1/Col6a1/Tln1/Lamb2/Col3a1/Col4a1/Col1a2/Col4a6/Pik3r5/Col6a2/Itga3	17
KEGG	mmu04380	Osteoclast differentiation	12/185	115/5208	0.000708177	0.0143659	Fos/Ctsk/Pirb/Plcg2/Csf1r/Fosl2/Pik3r5/Cybb/Ncf1/Tnfrsf11b/Ncf2/Syk	12
KEGG	mmu05144	Malaria	7/185	46/5208	0.00105324	0.018695	Hba-a2/Hbb-b1/Hbb-b2/Itgb2/Cd36/Gypc/Icam1	7
KEGG	mmu04060	Cytokine-cytokine receptor interaction	17/185	216/5208	0.00157287	0.0226448	Cxcl1/Ccr1/Csf2rb/Csf2ra/Ccr2/Tnfrsf12a/Inhbe/Lepr/Tnfrsf1b/Kitl/Clcf1/Pf4/Ccl6/Il6ra/Csf1r/Cxcl14/Tnfrsf11b	17
KEGG	mmu04966	Collecting duct acid secretion	5/185	25/5208	0.00159471	0.0226448	Slc4a1/Tcirg1/Car2/Atp6v0a4/Atp6v0d2	5
